# Supplementary material for: Regulation of Gene Expression of Methionine Sulfoxide Reductases and Their New Putative Roles in Plants
Source: PubMed Central journal article supplement (PMC6471524; doi:10.3390/ijms20061309), 2019-03-15
Supplement: ijms-20-01309-s001.pdf [file ijms-20-01309-s001.pdf]

| Name* | Locus                                                                                                                                                                                                                                                                                                          | Promoter                                                                          | Transcript                                                                                |
|-------|----------------------------------------------------------------------------------------------------------------------------------------------------------------------------------------------------------------------------------------------------------------------------------------------------------------|-----------------------------------------------------------------------------------|-------------------------------------------------------------------------------------------|
| PMSR1 | <b>peptidemethionine sulfoxide reductase 1</b><br>PMSR1 (GeneID: <a href="#">836286</a> )<br>Chromosome 5, Contig TAIR10_5<br>Synonyms: ARABIDOPSIS THALIANA<br>METHIONINE SULFOXIDE REDUCTASE A1,<br>AT5G61640, ATMSRA1, K11J9.18, K11J9_18,<br>peptidemethionine sulfoxide reductase 1, PMSR1<br>GXL_1314243 | GXP_3466370 (+)<br>24773980-24775155 (1176 bp)<br><br><b>3 coding transcripts</b> | <a href="#">GXT_28720625</a> (2 exons)<br><a href="#">NM_001345485</a> (PMSR1)            |
|       |                                                                                                                                                                                                                                                                                                                |                                                                                   | <a href="#">GXT_24712510</a> (2 exons)<br><a href="#">NM_125558</a> (PMSR1)<br>TSS = 1049 |
|       |                                                                                                                                                                                                                                                                                                                |                                                                                   | <a href="#">GXT_24723693</a> (2 exons)<br><a href="#">AK227434</a> (PMSR1)<br>TSS = 1076  |
| PMSR2 | <b>peptidemethionine sulfoxide reductase 2</b><br>PMSR2 (GeneID: <a href="#">830637</a> )<br>Chromosome 5, Contig TAIR10_5<br>Synonyms: ARABIDOPSIS THALIANA<br>METHIONINE SULFOXIDE REDUCTASE 2,<br>AT5G07460, ATMSRA2, peptidemethionine<br>sulfoxide reductase 2, PMSR2, T2I1.170, T2I1_170<br>GXL_1309175  | GXP_3460425 (-)<br>2361793-2363228 (1436 bp)<br><br><b>1 coding transcript</b>    | <a href="#">GXT_24688085</a> (2 exons)<br><a href="#">NM_120828</a> (PMSR2)               |
| PMSR3 | <b>peptidemethionine sulfoxide reductase 3</b><br>PMSR3 (GeneID: <a href="#">830638</a> )<br>Chromosome 5, Contig TAIR10_5<br>Synonyms: ARABIDOPSIS THALIANA<br>METHIONINE SULFOXIDE REDUCTASE 3,<br>AT5G07470, ATMSRA3, peptidemethionine<br>sulfoxide reductase 3, PMSR3, T2I1.180, T2I1_180<br>GXL_1309176  | GXP_3460426 (-)<br>2364171-2365479 (1309 bp)<br><br><b>2 coding transcripts</b>   | <a href="#">GXT_24688152</a> (2 exons)<br><a href="#">NM_120829</a> (PMSR3)               |
|       |                                                                                                                                                                                                                                                                                                                |                                                                                   | <a href="#">GXT_24720272</a> (2 exons)<br><a href="#">AK118353</a> (PMSR3)<br>TSS = 1209  |
| PMSR4 | <b>peptide met sulfoxide reductase 4</b><br>PMSR4 (GeneID: <a href="#">828616</a> )<br>Chromosome 4, Contig TAIR10_4<br>Synonyms: AT4G25130, F24A6.2, methionine<br>sulfoxide reductase A4, MSRA4, peptide met<br>sulfoxide reductase 4, PMSR4<br>GXL_1306811                                                  | GXP_3457608 (-)<br>12899990-12901090 (1101 bp)<br><br><b>1 coding transcript</b>  | <a href="#">GXT_24698183</a> (2 exons)<br><a href="#">NM_118645</a> (PMSR4)               |

|              |                                                                                                                                                                                                                                                |                                                                                   |                                                                                              |
|--------------|------------------------------------------------------------------------------------------------------------------------------------------------------------------------------------------------------------------------------------------------|-----------------------------------------------------------------------------------|----------------------------------------------------------------------------------------------|
| <b>MsrA5</b> | <b>Peptide methionine sulfoxide reductase family protein</b><br>MSRA5 (GeneID: <a href="#">816315</a> )<br>Chromosome 2, Contig TAIR10_2<br>Synonyms: AT2G18030, methionine sulfoxide reductase A5, MSRA5, T27K22.10, T27K22_10<br>GXL_1295342 | GXP_3444183 (+)<br>7839037-7840208 (1172 bp)<br><br><b>3 coding transcripts</b>   | <a href="#">GXT_24701888</a> (4 exons)<br><a href="#">NM_127359</a> (MSRA5)                  |
|              |                                                                                                                                                                                                                                                |                                                                                   | <a href="#">GXT_24701887</a> (3 exons)<br><a href="#">NM_201754</a> (MSRA5)<br>TSS = 1031    |
|              |                                                                                                                                                                                                                                                |                                                                                   | <a href="#">GXT_24721662</a> (4 exons)<br><a href="#">AK227376</a> (MSRA5)<br>TSS = 1072s    |
| <b>MsrB1</b> | <b>methionine sulfoxide reductase B 1</b><br>MSRB1 (GeneID: <a href="#">841804</a> )<br>Chromosome 1, Contig TAIR10_1<br>Synonyms: AT1G53670, ATMSRB1, F22G10.17, F22G10_17, methionine sulfoxide reductase B 1, MSRB1<br>GXL_1291503          | GXP_3439680 (+)<br>20035631-20036802 (1172 bp)<br><br><b>3 coding transcripts</b> | <a href="#">GXT_24712929</a> (5 exons)<br><a href="#">NM_104245</a> (MSRB1)                  |
|              |                                                                                                                                                                                                                                                |                                                                                   | <a href="#">GXT_24712930</a> (5 exons)<br><a href="#">NM_001124012</a> (MSRB1)<br>TSS = 1011 |
|              |                                                                                                                                                                                                                                                |                                                                                   | <a href="#">GXT_24721486</a> (5 exons)<br><a href="#">AK117314</a> (MSRB1)<br>TSS = 1072     |
| <b>MsrB2</b> | <b>methionine sulfoxide reductase B 2</b><br>MSRB2 (GeneID: <a href="#">828274</a> )<br>Chromosome 4, Contig TAIR10_4<br>Synonyms: AT4G21860, methionine sulfoxide reductase B 2, MSRB2, T8O5.70, T8O5_70<br>GXL_1306445                       | GXP_3457183 (-)<br>11601429-11602724 (1296 bp)<br><br><b>5 coding transcripts</b> | <a href="#">GXT_24693439</a> (3 exons)<br><a href="#">NM_118306</a> (MSRB2)                  |
|              |                                                                                                                                                                                                                                                |                                                                                   | <a href="#">GXT_24693440</a> (3 exons)<br><a href="#">NM_001084954</a> (MSRB2)<br>TSS = 1148 |
|              |                                                                                                                                                                                                                                                |                                                                                   | <a href="#">GXT_25289186</a> (4 exons)<br><a href="#">NM_001203862</a> (MSRB2)<br>TSS = 1148 |
|              |                                                                                                                                                                                                                                                |                                                                                   | <a href="#">GXT_28708001</a> (4 exons)<br><a href="#">NM_001341518</a> (MSRB2)<br>TSS = 1148 |
|              |                                                                                                                                                                                                                                                |                                                                                   | <a href="#">GXT_24718961</a> (3 exons)<br><a href="#">AK316971</a> (MSRB2)<br>TSS = 1196     |
| <b>MsrB3</b> | <b>methionine sulfoxide reductase B3</b><br>MSRB3 (GeneID: <a href="#">825817</a> )<br>Chromosome 4, Contig TAIR10_4<br>Synonyms: AT4G04800, ATMSRB3, methionine                                                                               | GXP_3455236 (+)<br>2438520-2439620 (1101 bp)<br><br><b>1 coding transcript</b>    | <a href="#">GXT_24715441</a> (3 exons)<br><a href="#">NM_116718</a> (MSRB3)                  |

|              |                                                                                                                                                                                                                                   |                                                                                   |                                                                                              |
|--------------|-----------------------------------------------------------------------------------------------------------------------------------------------------------------------------------------------------------------------------------|-----------------------------------------------------------------------------------|----------------------------------------------------------------------------------------------|
|              | sulfoxide reductase B3, MSRB3, T4B21.6, T4B21_6<br>GXL_1304769                                                                                                                                                                    |                                                                                   |                                                                                              |
| <b>MsrB4</b> | <b>methionine sulfoxide reductase B4</b><br>MSRB4 (GeneID: <a href="#">825818</a> )<br>Chromosome 4, Contig TAIR10_4<br>Synonyms: AT4G04810, ATMSRB4, methionine sulfoxide reductase B4, MSRB4, T4B21.22, T4B21_22<br>GXL_1304770 | GXP_3455238 (+)<br>2440241-2441341 (1101 bp)<br><br><b>2 coding transcripts</b>   | <a href="#">GXT 24715521</a> (3 exons)<br><a href="#">NM 116719</a> (MSRB4)                  |
|              |                                                                                                                                                                                                                                   |                                                                                   | <a href="#">GXT 28717681</a> (2 exons)<br><a href="#">NM 001340514</a> (MSRB4)               |
| <b>MsrB5</b> | <b>methionine sulfoxide reductase B5</b><br>MSRB5 (GeneID: <a href="#">825820</a> )<br>Chromosome 4, Contig TAIR10_4<br>Synonyms: AT4G04830, ATMSRB5, methionine sulfoxide reductase B5, MSRB5, T4B21.5, T4B21_5<br>GXL_1304771   | GXP_3455239 (+)<br>2444775-2445894 (1120 bp)<br><br><b>2 coding transcripts</b>   | <a href="#">GXT 24715522</a> (3 exons)<br><a href="#">NM 116721</a> (MSRB5)                  |
|              |                                                                                                                                                                                                                                   |                                                                                   | <a href="#">GXT 25290545</a> (3 exons)<br><a href="#">NM 001203745</a> (MSRB5)<br>TSS = 1020 |
| <b>MsrB6</b> | <b>methionine sulfoxide reductase B6</b><br>MSRB6 (GeneID: <a href="#">825821</a> )<br>Chromosome 4, Contig TAIR10_4<br>Synonyms: AT4G04840, ATMSRB6, methionine sulfoxide reductase B6, MSRB6, T4B21.4, T4B21_4<br>GXL_1304772   | GXP_3455240 (+)<br>2448434-2449660 (1227 bp)<br><br><b>2 coding transcripts</b>   | <a href="#">GXT 24715384</a> (4 exons)<br><a href="#">NM 116722</a> (MSRB6)                  |
|              |                                                                                                                                                                                                                                   |                                                                                   | <a href="#">GXT 24723339</a> (4 exons)<br><a href="#">AK118878</a> (MSRB6)<br>TSS = 1127     |
| <b>MsrB7</b> | <b>methionine sulfoxide reductase B7</b><br>MSRB7 (GeneID: <a href="#">828271</a> )<br>Chromosome 4, Contig TAIR10_4<br>Synonyms: AT4G21830, ATMSRB7, methionine sulfoxide reductase B7, MSRB7, T8O5.40, T8O5_40<br>GXL_1306442   | GXP_3457179 (-)<br>11585291-11586542 (1252 bp)<br><br><b>2 coding transcripts</b> | <a href="#">GXT 24693545</a> (3 exons)<br><a href="#">NM 118303</a> (MSRB7)                  |
|              |                                                                                                                                                                                                                                   |                                                                                   | <a href="#">GXT 24693546</a> (4 exons)<br><a href="#">NM 001084953</a> (MSRB7)<br>TSS = 1152 |
| <b>MsrB8</b> | <b>methionine sulfoxide reductase B8</b><br>MSRB8 (GeneID: <a href="#">828272</a> )<br>Chromosome 4, Contig TAIR10_4<br>Synonyms: AT4G21840, ATMSRB8, methionine sulfoxide reductase B8, MSRB8, T8O5.50, T8O5_50<br>GXL_1306443   | GXP_3457180 (-)<br>11588273-11589373 (1101 bp)<br><br><b>1 coding transcript</b>  | <a href="#">GXT 24693377</a> (3 exons)<br><a href="#">NM 118304</a> (MSRB8)                  |
| <b>MsrB9</b> | <b>methionine sulfoxide reductase B9</b><br>MSRB9 (GeneID: <a href="#">828273</a> )                                                                                                                                               | GXP_3457181 (-)<br>11592138-11593425 (1288 bp)                                    | <a href="#">GXT 24693438</a> (3 exons)<br><a href="#">NM 118305</a> (MSRB9)                  |

|  |                                                                                                                                             |                      |                                                                         |
|--|---------------------------------------------------------------------------------------------------------------------------------------------|----------------------|-------------------------------------------------------------------------|
|  | Chromosome 4, Contig TAIR10_4<br>Synonyms: AT4G21850, ATMSRB9, methionine<br>sulfoxide reductase B9, MSRB9, T8O5.60, T8O5_60<br>GXL_1306444 | 2 coding transcripts | <u>GXT_24693437</u> (2 exons)<br><u>NM_179087</u> (MSRB9)<br>TSS = 1188 |
|--|---------------------------------------------------------------------------------------------------------------------------------------------|----------------------|-------------------------------------------------------------------------|

**Table S1A** The list of 5 isoforms of methionine sulfoxide reductase (Msr) type A genes and 9 isoforms of B-type Msr (MsrB) genes originated from the *Arabidopsis thaliana* genome. Gene sequences were derived from the TAIR 10 database (<https://www.arabidopsis.org/>). For each gene the full name, accession number (ID), chromosome location, and all synonyms are given. For each gene all promoters were extracted directly from the ElDorado genome database ([https://www.genomatix.de/online\\_help/help\\_eldorado/introduction.html](https://www.genomatix.de/online_help/help_eldorado/introduction.html)). The location and length of each promoter accompanied by the number of encoded transcripts are specified. For each sequence analyzed the transcript start site (TSS) is 1001 unless specified otherwise. Each transcript is characterized with the number of exons and accession number to specific mRNA sequence in National Center for Biotechnology Information database (<https://www.ncbi.nlm.nih.gov>).

| Name*   | Locus                                                                                                                                                                                                                         | Promoter                                                                   | Transcript                                                                                                                                                                                   |
|---------|-------------------------------------------------------------------------------------------------------------------------------------------------------------------------------------------------------------------------------|----------------------------------------------------------------------------|----------------------------------------------------------------------------------------------------------------------------------------------------------------------------------------------|
| MsrA2.1 | <b>methionine sulfoxide reductase family protein</b><br>POPTR_0012s09290g (GeneID: <a href="#">7484440</a> );<br>Chromosome LGXII, Contig NC_008478<br>Synonyms: POPTRDRAFT_422117,<br>POPTR_0012s09290g<br>GXL_914392        | GXP_2492359 (-)<br>10326644-10327744 (1101 bp)<br><br>1 coding transcript  | <a href="#">GXT_23681117</a> (2 exons)<br><a href="#">XM_002318656</a> (POPTR_0012s09290g)                                                                                                   |
| MsrA2.2 | <b>hypothetical protein</b><br>POPTR_0015s09910g (GeneID: <a href="#">18105852</a> )<br>Chromosome LGXV, Contig NC_008481<br>Synonyms: POPTR_0015s09910g<br>GXL_1953678                                                       | GXP_5576574 (-)<br>10974177-10975277 (1101 bp)<br><br>1 coding transcript  | <a href="#">GXT_26747626</a> (2 exons)<br><a href="#">XM_006374483</a> (POPTR_0015s09910g)                                                                                                   |
| MsrA4.1 | <b>hypothetical protein</b><br>POPTR_0015s12390g (GeneID: <a href="#">7457599</a> )<br>Chromosome LGXV, Contig NC_008481<br>Synonyms: POPTRDRAFT_824833,<br>POPTR_0015s12390g<br>GXL_918998                                   | GXP_2497451 (-)<br>12656397-12657497 (1101 bp)<br><br>1 coding transcript  | <a href="#">GXT_23685395</a> (2 exons)<br><a href="#">XM_002322287</a> (POPTR_0015s12390g)                                                                                                   |
| MsrA4.2 | <b>hypothetical protein</b><br>POPTR_0012s11630g (GeneID: <a href="#">18103860</a> )<br>Chromosome LGXII, Contig NC_008478<br>Synonyms: POPTR_0012s11630g<br>GXL_2308570                                                      | GXP_7080902 (-)<br>11980041-11981141 (1101 bp)<br><br>1 coding transcript  | <a href="#">GXT_28080054</a> (2 exons)<br><a href="#">XM_006376903</a> (POPTR_0012s11630g)                                                                                                   |
| MsrA5   | <b>peptide methionine sulfoxide reductase family protein</b><br>POPTR_0007s14050g (GeneID: <a href="#">7495540</a> )<br>Chromosome LGVII, Contig NC_008473<br>Synonyms: POPTRDRAFT_655450,<br>POPTR_0007s14050g<br>GXL_908130 | GXP_2485511 (+)<br>13975396-13976496 (1101 bp)<br><br>1 coding transcript  | <a href="#">GXT_23688611</a> (4 exons)<br><a href="#">XM_002310268</a> (POPTR_0007s14050g)                                                                                                   |
| MsrB1   | <b>hypothetical protein</b><br>POPTR_0011s11490g (GeneID: <a href="#">7462308</a> )<br>Chromosome LGXI, Contig NC_008477<br>Synonyms: POPTRDRAFT_568844,<br>POPTR_0011s11490g<br>GXL_2308225                                  | GXP_7080439 (+)<br>14233440-14234540 (1101 bp)<br><br>2 coding transcripts | <a href="#">GXT_28087242</a> (3 exons)<br><a href="#">XM_006377694</a> (POPTR_0011s11490g)<br><br><a href="#">GXT_28087243</a> (4 exons)<br><a href="#">XM_002316839</a> (POPTR_0011s11490g) |

**Table S1B**

|                |                                                                                                                                                                                               |                                                                            |                                                                                            |
|----------------|-----------------------------------------------------------------------------------------------------------------------------------------------------------------------------------------------|----------------------------------------------------------------------------|--------------------------------------------------------------------------------------------|
| <b>MsrB3.1</b> | <b>hypothetical protein</b><br>POPTR_0001s29320g (GeneID: <a href="#">7470782</a> )<br>Chromosome LGI, Contig NC_008467<br>Synonyms: POPTRDRAFT_707507,<br>POPTR_0001s29320g<br>GXL_895645    | GXP_2471852 (+)<br>28036075-28037175 (1101 bp)<br><br>2 coding transcripts | <a href="#">GXT_26739897</a> (2 exons)<br><a href="#">XM_006369640</a> (POPTR_0001s29320g) |
|                |                                                                                                                                                                                               |                                                                            | <a href="#">GXT_23675830</a> (3 exons)<br><a href="#">XM_002300270</a> (POPTR_0001s29320g) |
| <b>MsrB3.2</b> | <b>hypothetical protein</b><br>POPTR_0009s08420g (GeneID: <a href="#">7469676</a> )<br>Chromosome LGIX, Contig NC_008475<br>Synonyms: POPTRDRAFT_767763,<br>POPTR_0009s08420g<br>GXL_902769   | GXP_2479686 (+)<br>7712847-7713947 (1101 bp)<br><br>2 coding transcripts   | <a href="#">GXT_26745176</a> (3 exons)<br><a href="#">XM_006379082</a> (POPTR_0009s08420g) |
|                |                                                                                                                                                                                               |                                                                            | <a href="#">GXT_23679128</a> (3 exons)<br><a href="#">XM_002313915</a> (POPTR_0009s08420g) |
| <b>MsrB5</b>   | <b>hypothetical protein</b><br>POPTR_0008s20300g (GeneID: <a href="#">7454233</a> )<br>Chromosome LGVIII, Contig NC_008474<br>Synonyms: POPTRDRAFT_565286,<br>POPTR_0008s20300g<br>GXL_910001 | GXP_2487518 (-)<br>14053984-14055084 (1101 bp)<br><br>1 coding transcript  | <a href="#">GXT_23679962</a> (3 exons)<br><a href="#">XM_002312688</a> (POPTR_0008s20300g) |

**Table S1B** The list of 5 isoforms of methionine sulfoxide reductase (Msr) type A genes and 4 isoforms of B-type Msr (MsrB) genes originated from the *Populus trichocarpa* genome. Gene sequences were derived from the using Poptr 2.0 database ([https://phytozome.jgi.doe.gov/pz/portal.html#!info?alias=Org\\_Ptrichocarpa](https://phytozome.jgi.doe.gov/pz/portal.html#!info?alias=Org_Ptrichocarpa)). For each gene the full name, accession number (ID), chromosome location, and all synonyms are given. For each gene all promoters were extracted directly from the EIDorado genome database ([https://www.genomatix.de/online\\_help/help\\_eldorado/introduction.html](https://www.genomatix.de/online_help/help_eldorado/introduction.html)). The location and length of each promoter accompanied by the number of encoded transcripts are specified. For each sequence analyzed the transcript start site (TSS) is 1001 unless specified otherwise. Each transcript is characterized with the number of exons and accession number to specific mRNA sequence in National Center for Biotechnology Information database (<https://www.ncbi.nlm.nih.gov>).

| Gene name      | Locus                                                                                                                                                                                                              | Promoter                                                                          | Transcript                                                                                        |
|----------------|--------------------------------------------------------------------------------------------------------------------------------------------------------------------------------------------------------------------|-----------------------------------------------------------------------------------|---------------------------------------------------------------------------------------------------|
| <i>MsrA2.1</i> | <b>peptide methionine sulfoxide reductase A2-1</b><br>LOC4336192 (GeneID: <a href="#">4336192</a> )<br>Chromosome 4, Contig 13104<br>Synonyms: LOC4336192, MSRA2-1, OsJ_15220,<br>OsMSRA2.1<br>GXL_810337          | GXP_2162925 (-)<br>24104768-24105933 (1166 bp)<br><br><b>2 coding transcripts</b> | <a href="#">GXT_28014730</a> (2 exons)<br><a href="#">XM_015781799</a> (LOC4336192)               |
|                |                                                                                                                                                                                                                    |                                                                                   | <a href="#">GXT_23452618</a> (2 exons)<br><a href="#">AK064801</a> (LOC4336192)<br>TSS = 1066     |
| <i>MsrA2.2</i> | <b>peptide methionine sulfoxide reductase A2-2</b><br>LOC107277650 (GeneID: <a href="#">107277650</a> )<br>Chromosome 4, Contig 13104<br>Synonyms: LOC107277650, MSRA2-2, OsMSRA2.2<br>GXL_2292712                 | GXP_7016752 (-)<br>24110771-24111871 (1101 bp)<br><br><b>1 coding transcript</b>  | <a href="#">GXT_28013482</a> (3 exons)<br><a href="#">XM_015779606</a> (LOC107277650)             |
| <i>MsrA4</i>   | <b>peptide methionine sulfoxide reductase A4, chloroplastic</b><br>LOC4349402 (GeneID: <a href="#">4349402</a> )<br>Chromosome 10, Contig 13110<br>Synonyms: LOC4349402, MSRA4, OsMSRA4<br>GXL_793939              | GXP_2144455 (+)<br>22253764-22254987 (1224 bp)<br><br><b>2 coding transcripts</b> | <a href="#">GXT_28048001</a> (2 exons)<br><a href="#">XM_015758657</a> (LOC4349402)               |
|                |                                                                                                                                                                                                                    |                                                                                   | <a href="#">GXT_23466560</a> (2 exons)<br><a href="#">AK067167</a> (LOC4349402)<br>TSS = 1020     |
|                |                                                                                                                                                                                                                    |                                                                                   | <a href="#">GXT_23472590</a> (1 exon)<br><a href="#">AK109715</a> (LOC4349402)<br>TSS = 1124      |
| <i>MsrA5</i>   | <b>peptide methionine sulfoxide reductase A5</b><br>LOC4340052 (GeneID: <a href="#">4340052</a> )<br>Chromosome 6, Contig 13106<br>Synonyms: LOC4340052, MSRA5, OsMSRA5<br>GXL_814325                              | GXP_2167398 (-)<br>2029286-2031318 (2033 bp)<br><br><b>2 coding transcripts</b>   | <a href="#">GXT_28017847</a> (4 exons)<br><a href="#">XM_015787395</a> (LOC4340052)<br>TSS = 1018 |
|                |                                                                                                                                                                                                                    |                                                                                   | <a href="#">GXT_23453583</a> (4 exons)<br><a href="#">AK069328</a> (LOC4340052)<br>TSS = 1108     |
| <i>MsrB1</i>   | <b>peptide methionine sulfoxide reductase B1, chloroplastic</b><br>LOC4341018 (GeneID: <a href="#">4341018</a> )<br>Chromosome 6, Contig 13106<br>Synonyms: LOC4341018, MSRB1, OsJ_21331,<br>OsMSRB1<br>GXL_815326 | GXP_2168518 (-)<br>15721109-15722368 (1260 bp)<br><br><b>1 coding transcript</b>  | <a href="#">GXT_28018647</a> (5 exons)<br><a href="#">XM_015788787</a> (LOC4341018)               |



**Table S1C**

|              |                                                                                                                                                                                                          |                                                                                   |                                                                                               |
|--------------|----------------------------------------------------------------------------------------------------------------------------------------------------------------------------------------------------------|-----------------------------------------------------------------------------------|-----------------------------------------------------------------------------------------------|
| <i>MsrB3</i> | <b>peptide methionine sulfoxide reductase B3,<br/>chloroplactic</b><br>LOC4338744 (GeneID: <a href="#">4338744</a> )<br>Chromosome 5, Contig 13105<br>Synonyms: LOC4338744, MSRB3, OsMSRB3<br>GXL_812980 | GXP_2165891 (+)<br>19680750-19681945 (1196 bp)<br><br><b>3 coding transcripts</b> | <a href="#">GXT_28039792</a> (3 exons)<br><a href="#">XM_015781814</a> (LOC4338744)           |
|              |                                                                                                                                                                                                          |                                                                                   | <a href="#">GXT_23470549</a> (3 exons)<br><a href="#">AK071730</a> (LOC4338744)<br>TSS = 1019 |
|              |                                                                                                                                                                                                          |                                                                                   | <a href="#">GXT_23470404</a> (3 exons)<br><a href="#">AK104169</a> (LOC4338744)<br>TSS = 1023 |
| <i>MsrB5</i> | <b>peptide methionine sulfoxide reductase B5</b><br>LOC4332888 (GeneID: <a href="#">4332888</a> )<br>Chromosome 3, Contig 13103<br>Synonyms: LOC4332888, MSRB5, OsJ_10923,<br>OsMSRB5<br>GXL_807000      | GXP_2159172 (+)<br>14009172-14010318 (1147 bp)<br><br><b>2 coding transcripts</b> | <a href="#">GXT_28037587</a> (3 exons)<br><a href="#">XM_015777603</a> (LOC4332888)           |
|              |                                                                                                                                                                                                          |                                                                                   | <a href="#">GXT_23469473</a> (3 exons)<br><a href="#">AK068764</a> (LOC4332888)<br>TSS = 1042 |

**Table S1C** The list of 4 isoforms of methionine sulfoxide reductase (Msr) type A genes and 3 isoforms of B-type Msr (MsrB) genes originated from *Oryza sativa* genome. Gene sequences were derived from the MSU release 7 database (<http://www.plantgdb.org/OsGDB/>). For each gene the full name, accession number (ID), chromosome location, and all synonyms are given. For each gene all promoters were extracted directly from the ElDorado genome database ([https://www.genomatix.de/online\\_help/help\\_eldorado/introduction.html](https://www.genomatix.de/online_help/help_eldorado/introduction.html)). The location and length of each promoter accompanied by the number of encoded transcripts are specified. For each sequence analyzed the transcript start site (TSS) is 1001 unless specified otherwise. Each transcript is characterized with the number of exons and accession number to specific mRNA sequence in National Center for Biotechnology Information database (<https://www.ncbi.nlm.nih.gov>).

**Table S2A** List of TFs and REs predicted to interact with the promoter region of one specific type (A or B) of *Msr* gene originating from the *Arabidopsis thaliana*, *Populus trichocarpa*, and *Oryza sativa* genomes. The predictions were made using MatInspector software, and the intersections of the 2 lists of elements were calculated using the Venn web tool.

|          | Type-specific TFs and REs                                                                                                                                                                                                                                                                                                                                                                                                                                                                                                                                                                                                                                                                                                                                                                                                                                                                                                                                                                                                                                                                                                                                                                                                                                                                                                                                                                                                                                                                                                                                                                                                                                                                                                                                                                                                                                                                                                                                                                                                                                                                                                                                                                                                                                                                                     |
|----------|---------------------------------------------------------------------------------------------------------------------------------------------------------------------------------------------------------------------------------------------------------------------------------------------------------------------------------------------------------------------------------------------------------------------------------------------------------------------------------------------------------------------------------------------------------------------------------------------------------------------------------------------------------------------------------------------------------------------------------------------------------------------------------------------------------------------------------------------------------------------------------------------------------------------------------------------------------------------------------------------------------------------------------------------------------------------------------------------------------------------------------------------------------------------------------------------------------------------------------------------------------------------------------------------------------------------------------------------------------------------------------------------------------------------------------------------------------------------------------------------------------------------------------------------------------------------------------------------------------------------------------------------------------------------------------------------------------------------------------------------------------------------------------------------------------------------------------------------------------------------------------------------------------------------------------------------------------------------------------------------------------------------------------------------------------------------------------------------------------------------------------------------------------------------------------------------------------------------------------------------------------------------------------------------------------------|
| <b>A</b> | Ethylene-responsive transcription factor ERF014 (AT1G44830), Putative cis-acting element on various PAL and 4CL gene promoters, Ethylene-responsive transcription factor 2, Rice bHLH protein, WRKY transcription factor 8, NAM-like protein CUP-SHAPED COTYLEDON 1, BES1-interacting Myc-like protein 1, B3 domain-containing transcription factor NGA4, Myb domain protein 118 (Plant Growth Activator 37, PGA37), WRKY DNA-binding protein 40, Ethylene-responsive transcription factor 10, Mitochondrial dysfunction motif Myb domain protein 74, KNOTTED1 (KN1) and KNOTTED interacting protein (KIP) are TALE class homeodomain proteins - the KN1-KIP complex binds this DNA motif with high affinity, RNA polymerase III transcription initiation factor complex (TFIIIC), NAC domain containing protein 96, Cytokinin Response Factor 10, Nodulin consensus sequence 3, Sugar responsive elements Myb domain protein 116, Ethylene-responsive transcription factor 105, VIRE2-interacting protein 1, Ethylene-responsive transcription factor 115, R2R3-type myb-like transcription factor (IIG-type binding site), Heat stress transcription factor C-1, C-repeat-binding factor 2 (DREB1B), Cooperatively regulated by ethylene and jasmonate 1 (DEAR1), Transcription factor TCP23, Ethylene-responsive transcription factor 5, Myb domain protein 111 (secondary DNA binding preference), Iron-dependent regulatory sequence, BES1-interacting Myc-like protein 2, Ethylene-responsive transcription factor ERF112 (AT2G33710), RY and Sph motifs conserved in seed-specific promoters, TCP domain protein 7, TCP domain protein 21 (AT5G08330), C-repeat-binding factor 3 (DREB1A), TCP class II transcription factor, Ethylene-responsive transcription factor ERF019 (AT1G22810), Ethylene-responsive transcription factor ERF017 (AT1G19210), NAC (No Apical Meristem) domain transcriptional regulator superfamily protein, Ethylene-responsive transcription factor 15 (AT2G31230), Dof zinc finger protein DOF5.1 (AT5G02460), NAC domain containing protein 3 (ORE1 SISTER1), Redox responsive transcription factor 1 (secondary DNA binding preference), Ethylene-responsive transcription factor ERF018 (secondary DNA binding preference), Dof zinc finger protein DOF2.2 (AT2G28810) |
| <b>B</b> | Myb domain protein 119, Heat stress transcription factor A-1b (HSF3), Transcription factor TGA3, Indeterminate(ID)-domain 5 protein (RAVEN), BES1/BZR1 homolog 4 (AT1G78700), WRKY DNA binding protein 38, OCS-like elements, CUP-SHAPED COTYLEDON 2, HRS1 Homolog 3 (AT1G25550), REVEILLE 5, C-repeat-binding factor 2 (DREB1C), Dehydration-responsive element-binding protein 2C (secondary DNA binding preference), LIM domain protein binding to a PAL-box like sequence, Arabidopsis NAC domain containing protein 81; ATAF2 Dof zinc finger protein DOF4.7 (AT4G38000), ABA-responsive element binding protein 3, WRKY DNA binding protein 12, Homeobox-leucine zipper protein HAT2, Indeterminate(ID)-domain 11 (AtIDD11), WRKY transcription factor 55, Homeodomain protein of the Knotted class1, Phytochrome-interacting factor 5 (PIL6), NAC domain containing protein 45, Transcription factor TCP15 (AT1G69690), Dof zinc finger protein DOF5.8 (AT5G66940), E2F transcription factor 3, NTM1-LIKE 6 (NAC domain containing protein 62), Homeobox-leucine zipper protein ATHB-20, Vascular related NAC-domain protein 1, BBES1/BZR1-like protein 2 (AT4G36780), Silencing element binding factor - transcriptional repressor Myb domain protein 55                                                                                                                                                                                                                                                                                                                                                                                                                                                                                                                                                                                                                                                                                                                                                                                                                                                                                                                                                                                                                                              |

**Table S2B** List of TFs and REs predicted to interact with the promoter region of *MsrS* originating from one of the three studied species, i.e., *Arabidopsis thaliana* (At), *Populus trichocarpa* (Pt), and *Oryza sativa* (Os). The predictions were made using MatInspector software, and the intersections of the 3 lists of elements were calculated using the Venn web tool.

|           | Species-specific TFs and REs                                                                                                                                                                                                                                                                                                                                                                                                                                                                                                                                                                                                                                                                                                                                                                                                                                                                                                                                                                                                                                                                                                                                                                                                                                                                                                                                                                                                                                                                                                                                                                                                                                                                                                                                                                                                                                                                                                                                                                                                                                                                                                                                                                                                                |
|-----------|---------------------------------------------------------------------------------------------------------------------------------------------------------------------------------------------------------------------------------------------------------------------------------------------------------------------------------------------------------------------------------------------------------------------------------------------------------------------------------------------------------------------------------------------------------------------------------------------------------------------------------------------------------------------------------------------------------------------------------------------------------------------------------------------------------------------------------------------------------------------------------------------------------------------------------------------------------------------------------------------------------------------------------------------------------------------------------------------------------------------------------------------------------------------------------------------------------------------------------------------------------------------------------------------------------------------------------------------------------------------------------------------------------------------------------------------------------------------------------------------------------------------------------------------------------------------------------------------------------------------------------------------------------------------------------------------------------------------------------------------------------------------------------------------------------------------------------------------------------------------------------------------------------------------------------------------------------------------------------------------------------------------------------------------------------------------------------------------------------------------------------------------------------------------------------------------------------------------------------------------|
| <b>At</b> | WRKY transcription factor 8, NAM-like protein CUP-SHAPED COTYLEDON 1, Transcription factor TGA3, Indeterminate(ID)-domain 5 protein (RAVEN), BES1/BZR1 homolog 4 (AT1G78700), Dwarf and Delayed Flowering 2, WRKY DNA-binding protein 18, CUP-SHAPED COTYLEDON 2, REVEILLE 5 CUP-SHAPED COTYLEDON 3, ANT (Arabidopsis protein AINTEGUMENTA) member of the plant-specific family of AP2/EREBP-transcription factors, Arabidopsis NAC domain containing protein 81; ATAF2 Dof zinc finger protein DOF4.7 (AT4G38000), ABA-responsive element binding protein 3, RNA polymerase III transcription initiation factor complex (TFIIIC), Indeterminate(ID)-domain 11 (AtIDD11), NAC domain containing protein 2, WRKY transcription factor 55, DNA-binding protein S1FA3 HBP-1a, suggested to be involved in the cell cycle-dependent expression, Myb domain protein 116, Phytochrome-interacting factor 5 (PIL6), R2R3-type myb-like transcription factor (IIG-type binding site), Heat stress transcription factor C-1, Cooperatively regulated by ethylene and jasmonate 1 (DEAR1), NAC domain containing protein 45, BES1-interacting Myc-like protein 2 RY and Sph motifs conserved in seed-specific promoters, NAC (No Apical Meristem) domain transcriptional regulator superfamily protein, NTM1-LIKE 6 (NAC domain containing protein 62), NAC domain containing protein 3 (ORE1 SISTER1)                                                                                                                                                                                                                                                                                                                                                                                                                                                                                                                                                                                                                                                                                                                                                                                                                                                |
| <b>Pt</b> | Ethylene-responsive transcription factor ERF014 (AT1G44830), B3 domain-containing transcription factor NGA4, Myb domain protein 118 (Plant Growth Activator 37, PGA37), C-repeat-binding factor 2 (DREB1C) Myb domain protein 111 (secondary DNA binding preference), Dof zinc finger protein DOF5.8 (AT5G66940), C-repeat-binding factor 3 (DREB1A), Dof zinc finger protein DOF5.1 (AT5G02460), Dof zinc finger protein DOF2.2 (AT2G28810)                                                                                                                                                                                                                                                                                                                                                                                                                                                                                                                                                                                                                                                                                                                                                                                                                                                                                                                                                                                                                                                                                                                                                                                                                                                                                                                                                                                                                                                                                                                                                                                                                                                                                                                                                                                                |
| <b>Os</b> | Ethylene-responsive transcription factor RAP2-3 (secondary DNA binding preference), Ethylene-responsive transcription factor 2, LOB domain-containing protein 13, Heat stress transcription factor A-1b (HSF3), Wheat NAC-domain DNA binding factor (DNA binding site I), Rice bHLH protein Ethylene-responsive transcription factor RAP2-6, Ethylene-responsive transcription factor 10, Redox responsive transcription factor 1, Dehydration-responsive element-binding protein 2G (AT5G18450), Dehydration-responsive element-binding protein 2C (secondary DNA binding preference), Ethylene-responsive transcription factor ERF057 (AT5G65130), LIM domain protein binding to a PAL-box like sequence, Target of early activation tagged (EAT) 2, Ethylene-responsive transcription factor 1B (AT3G23240), Ethylene-responsive transcription factor 1A (AT4G17500), NAC domain containing protein 96, Cytokinin Response Factor 10, Ethylene-responsive transcription factor 8 FYF Up-regulating 321 Factor 1 (AT1G71450), Nodulin consensus sequence 3, Ethylene-responsive transcription factor 105, Ethylene-responsive transcription factor 115, C-repeat-binding factor 2 (DREB1B), Transcription factor TCP23, Transcription factor TCP15 (AT1G69690), Ethylene-responsive transcription factor 5, TCP class I transcription factor X gene core promoter element 1, Iron-dependent regulatory sequence, Ethylene and salt inducible 3, Transcription factor TGA2, Human motif ten element, TCP domain protein 21 (AT5G08330), TCP class II transcription factor, FAR-RED Impaired Response 1, Ethylene-responsive transcription factor ERF019 (AT1G22810), E2F transcription factor 3, Ethylene-responsive transcription factor ERF017 (AT1G19210), Phytochrome B-regulated transcription factor PIF3 Ethylene-responsive transcription factor 15 (AT2G31230), Dehydration-responsive element-binding protein 2C, Redox responsive transcription factor 1 (secondary DNA binding preference), Transcription factor II B (TFIIB) recognition element, BBES1/BZR1-like protein 2 (AT4G36780), Ethylene-responsive transcription factor ERF018 (secondary DNA binding preference), Ethylene-responsive transcription factor RAP2-11 |

**Table S2C** The list of transcription factors and responsive elements predicted to bind the promoter region of each isoform of methionine sulfoxide reductase type A and B of three species: *Arabidopsis thaliana*, *Populus trichocarpa*, and *Oryza sativa*. The TFs were predicted using MatInspector software and the intersections of 30 lists of elements were calculated using the Venn web tool.

| Gene Name                                                                                                                                                                                                                                                                              | total | Transcription factor or responsive element |
|----------------------------------------------------------------------------------------------------------------------------------------------------------------------------------------------------------------------------------------------------------------------------------------|-------|--------------------------------------------|
| AtMsra5 AtMsraB1 AtMsraB2 AtMsraB3 AtMsraB4 AtMsraB5 AtMsraB6 AtMsraB7<br>AtMsraB8 AtMsraB9 AtPMSR1 AtPMSR2 AtPMSR3 AtPMSR4 OsMsraA2.1<br>OsMsraA4 OsMsraA5 OsMsraB1 OsMsraB3 OsMsraB5 PtMsraA2.1 PtMsraA2.2<br>PtMsraA4.1 PtMsraA4.2 PtMsraA5 PtMsraB1 PtMsraB3.1 PtMsraB3.2 PtMsraB5 | 1     | Protodermal factor 2                       |
| AtMsra5 AtMsraB1 AtMsraB2 AtMsraB3 AtMsraB4 AtMsraB5 AtMsraB6 AtMsraB7<br>AtMsraB8 AtMsraB9 AtPMSR1 AtPMSR2 AtPMSR3 AtPMSR4 OsMsraA2.1<br>OsMsraA4 OsMsraA5 OsMsraB3 OsMsraB5 PtMsraA2.1 PtMsraA2.2 PtMsraA4.1<br>PtMsraA4.2 PtMsraA5 PtMsraB1 PtMsraB3.1 PtMsraB3.2 PtMsraB5          | 1     | Jasmonate response element                 |
| AtMsra5 AtMsraB1 AtMsraB2 AtMsraB3 AtMsraB4 AtMsraB5 AtMsraB6 AtMsraB7<br>AtMsraB8 AtMsraB9 AtPMSR1 AtPMSR2 AtPMSR3 AtPMSR4 OsMsraA2.1<br>OsMsraA4 OsMsraB1 OsMsraB5 PtMsraA2.1 PtMsraA2.2 PtMsraA4.1 PtMsraA4.2<br>PtMsraA5 PtMsraB1 PtMsraB3.1 PtMsraB3.2 PtMsraB5                   | 1     | SBF-1                                      |
| AtMsra5 AtMsraB1 AtMsraB2 AtMsraB3 AtMsraB4 AtMsraB5 AtMsraB6 AtMsraB7<br>AtMsraB8 AtMsraB9 AtPMSR1 AtPMSR2 AtPMSR3 AtPMSR4 OsMsraA2.1<br>OsMsraA4 OsMsraA5 OsMsraB1 OsMsraB3 OsMsraB5 PtMsraA2.1 PtMsraA4.1<br>PtMsraA4.2 PtMsraA5 PtMsraB1 PtMsraB3.1 PtMsraB3.2                     | 1     | Homeodomain protein WUSCHEL                |
| AtMsra5 AtMsraB1 AtMsraB2 AtMsraB3 AtMsraB4 AtMsraB5 AtMsraB6 AtMsraB7<br>AtMsraB8 AtMsraB9 AtPMSR2 AtPMSR3 AtPMSR4 OsMsraA2.1 OsMsraA4<br>OsMsraA5 OsMsraB3 OsMsraB5 PtMsraA2.1 PtMsraA2.2 PtMsraA4.1 PtMsraA4.2<br>PtMsraA5 PtMsraB1 PtMsraB3.1 PtMsraB3.2 PtMsraB5                  | 1     | Homeodomain GLABROUS 1                     |
| AtMsra5 AtMsraB1 AtMsraB2 AtMsraB3 AtMsraB4 AtMsraB5 AtMsraB6 AtMsraB7<br>AtMsraB8 AtMsraB9 AtPMSR1 AtPMSR2 AtPMSR3 AtPMSR4 OsMsraA2.1<br>OsMsraB3 OsMsraB5 PtMsraA2.1 PtMsraA2.2 PtMsraA4.1 PtMsraA4.2 PtMsraA5<br>PtMsraB1 PtMsraB3.1 PtMsraB3.2 PtMsraB5                            | 1     | Plant TATA box                             |
| AtMsra5 AtMsraB1 AtMsraB2 AtMsraB3 AtMsraB5 AtMsraB6 AtMsraB7 AtMsraB8<br>AtMsraB9 AtPMSR1 AtPMSR2 AtPMSR3 AtPMSR4 OsMsraA2.1 OsMsraA4<br>OsMsraB1 OsMsraB3 OsMsraB5 PtMsraA2.1 PtMsraA2.2 PtMsraA4.1 PtMsraA4.2<br>PtMsraB1 PtMsraB3.1 PtMsraB3.2 PtMsraB5                            | 1     | TESMIN/TSO1-like CXC 2                     |
| AtMsra5 AtMsraB1 AtMsraB2 AtMsraB4 AtMsraB5 AtMsraB6 AtMsraB7 AtMsraB8<br>AtMsraB9 AtPMSR1 AtPMSR2 AtPMSR3 AtPMSR4 OsMsraA2.1 OsMsraA4<br>OsMsraA5 OsMsraB1 OsMsraB5 PtMsraA2.1 PtMsraA2.2 PtMsraA4.1 PtMsraA4.2<br>PtMsraA5 PtMsraB1 PtMsraB3.2 PtMsraB5                              | 1     | KANADI box                                 |
| AtMsra5 AtMsraB1 AtMsraB2 AtMsraB3 AtMsraB4 AtMsraB5 AtMsraB6 AtMsraB7<br>AtMsraB8 AtMsraB9 AtPMSR1 AtPMSR2 AtPMSR3 AtPMSR4 OsMsraA2.1<br>OsMsraA4 OsMsraA5 PtMsraA2.1 PtMsraA2.2 PtMsraA4.1 PtMsraA5 PtMsraB1<br>PtMsraB3.1 PtMsraB3.2 PtMsraB5                                       | 1     | G2-like family protein                     |

|                                                                                                                                                                                                                                |   |                                                                                                                  |
|--------------------------------------------------------------------------------------------------------------------------------------------------------------------------------------------------------------------------------|---|------------------------------------------------------------------------------------------------------------------|
| AtMsrA5 AtMsrB1 AtMsrB2 AtMsrB3 AtMsrB4 AtMsrB5 AtMsrB6 AtMsrB8<br>AtMsrB9 AtPMSR1 AtPMSR2 AtPMSR3 AtPMSR4 OsMsrA2.1 OsMsrA2.2<br>OsMsrA4 OsMsrA5 OsMsrB1 OsMsrB5 PtMsrA2.1 PtMsrA4.1 PtMsrB1<br>PtMsrB3.1 PtMsrB3.2 PtMsrB5   | 1 | Stomatal Carpenter 1 (dof5.7) (secondary DNA binding preference)                                                 |
| AtMsrA5 AtMsrB1 AtMsrB2 AtMsrB3 AtMsrB4 AtMsrB5 AtMsrB7 AtMsrB8<br>AtMsrB9 AtPMSR1 AtPMSR2 AtPMSR3 AtPMSR4 OsMsrA4 OsMsrB3 OsMsrB5<br>PtMsrA2.1 PtMsrA2.2 PtMsrA4.1 PtMsrA4.2 PtMsrA5 PtMsrB1 PtMsrB3.1<br>PtMsrB3.2 PtMsrB5   | 1 | DIVARICATA 1 (myb related R-R-type factor AT5G58900)                                                             |
| AtMsrA5 AtMsrB1 AtMsrB2 AtMsrB3 AtMsrB5 AtMsrB6 AtMsrB7 AtMsrB8<br>AtMsrB9 AtPMSR1 AtPMSR2 AtPMSR3 AtPMSR4 OsMsrA2.1 OsMsrA4<br>OsMsrB1 PtMsrA2.1 PtMsrA2.2 PtMsrA4.1 PtMsrA4.2 PtMsrA5 PtMsrB1<br>PtMsrB3.1 PtMsrB3.2 PtMsrB5 | 1 | Trihelix transcription factor GT-1                                                                               |
| AtMsrA5 AtMsrB1 AtMsrB3 AtMsrB4 AtMsrB6 AtMsrB7 AtMsrB8 AtMsrB9<br>AtPMSR1 AtPMSR2 AtPMSR3 OsMsrA2.1 OsMsrA4 OsMsrA5 OsMsrB3<br>OsMsrB5 PtMsrA2.1 PtMsrA2.2 PtMsrA4.1 PtMsrA4.2 PtMsrA5 PtMsrB1<br>PtMsrB3.1 PtMsrB3.2 PtMsrB5 | 1 | Transcriptional repressor BELLRINGER                                                                             |
| AtMsrA5 AtMsrB1 AtMsrB2 AtMsrB3 AtMsrB5 AtMsrB6 AtMsrB7 AtMsrB8<br>AtMsrB9 AtPMSR1 AtPMSR4 OsMsrA2.1 OsMsrA4 OsMsrB1 OsMsrB3<br>OsMsrB5 PtMsrA2.1 PtMsrA2.2 PtMsrA4.1 PtMsrA4.2 PtMsrA5 PtMsrB1<br>PtMsrB3.1 PtMsrB3.2 PtMsrB5 | 1 | Nodulin consensus sequence 1                                                                                     |
| AtMsrA5 AtMsrB1 AtMsrB2 AtMsrB3 AtMsrB5 AtMsrB6 AtMsrB7 AtMsrB8<br>AtMsrB9 AtPMSR1 AtPMSR2 AtPMSR3 AtPMSR4 OsMsrA2.1 OsMsrA2.2<br>OsMsrA5 OsMsrB3 OsMsrB5 PtMsrA2.1 PtMsrA2.2 PtMsrA4.1 PtMsrA4.2<br>PtMsrB1 PtMsrB3.2         | 1 | Cis-element in the GAPDH promoters conferring light inducibility                                                 |
| AtMsrA5 AtMsrB2 AtMsrB3 AtMsrB4 AtMsrB5 AtMsrB6 AtMsrB7 AtMsrB9<br>AtPMSR1 AtPMSR2 AtPMSR3 AtPMSR4 OsMsrA2.1 OsMsrA4 OsMsrB5<br>PtMsrA2.1 PtMsrA2.2 PtMsrA4.1 PtMsrA4.2 PtMsrA5 PtMsrB1 PtMsrB3.1<br>PtMsrB3.2 PtMsrB5         | 1 | RAP2.2, involved in carotenoid and tocopherol biosynthesis and in the expression of photosynthesis-related genes |
| AtMsrA5 AtMsrB1 AtMsrB3 AtMsrB4 AtMsrB5 AtMsrB8 AtMsrB9 AtPMSR1<br>AtPMSR2 AtPMSR4 OsMsrA2.1 OsMsrA4 OsMsrA5 OsMsrB1 OsMsrB3<br>OsMsrB5 PtMsrA2.1 PtMsrA2.2 PtMsrA4.2 PtMsrA5 PtMsrB1 PtMsrB3.1<br>PtMsrB3.2 PtMsrB5           | 1 | DNA-binding storekeeper protein-related transcriptional regulator (AT4G00250)                                    |
| AtMsrA5 AtMsrB1 AtMsrB2 AtMsrB3 AtMsrB4 AtMsrB5 AtMsrB7 AtMsrB8<br>AtMsrB9 AtPMSR1 AtPMSR3 AtPMSR4 OsMsrA2.1 OsMsrA4 OsMsrB3<br>OsMsrB5 PtMsrA2.1 PtMsrA2.2 PtMsrA4.1 PtMsrA4.2 PtMsrA5 PtMsrB1<br>PtMsrB3.1 PtMsrB3.2         | 1 | Class I GATA factors                                                                                             |
| AtMsrA5 AtMsrB1 AtMsrB2 AtMsrB3 AtMsrB4 AtMsrB5 AtMsrB6 AtMsrB7<br>AtMsrB8 AtMsrB9 AtPMSR2 AtPMSR3 AtPMSR4 OsMsrA2.1 OsMsrA5                                                                                                   | 1 | Homeobox protein 32                                                                                              |

|                                                                                                                                                                                                                      |   |                                                                                |
|----------------------------------------------------------------------------------------------------------------------------------------------------------------------------------------------------------------------|---|--------------------------------------------------------------------------------|
| OsMsrb1 OsMsrb5 PtMsra2.1 PtMsra2.2 PtMsra4.1 PtMsra4.2 PtMsra5<br>PtMsrb3.1 PtMsrb3.2                                                                                                                               |   |                                                                                |
| AtMsra5 AtMsrb1 AtMsrb2 AtMsrb4 AtMsrb5 AtMsrb6 AtMsrb7 AtMsrb8<br>AtMsrb9 AtPMSR2 AtPMSR3 AtPMSR4 OsMsra2.1 OsMsra4 OsMsrb1<br>OsMsrb3 OsMsrb5 PtMsra2.1 PtMsra2.2 PtMsra4.2 PtMsra5 PtMsrb3.1<br>PtMsrb3.2 PtMsrb5 | 1 | Avian C-type LTR TATA box                                                      |
| AtMsra5 AtMsrb1 AtMsrb2 AtMsrb5 AtMsrb6 AtMsrb7 AtMsrb8 AtMsrb9<br>AtPMSR1 AtPMSR2 AtPMSR3 AtPMSR4 OsMsra2.2 OsMsrb1 OsMsrb3<br>OsMsrb5 PtMsra2.1 PtMsra4.1 PtMsra4.2 PtMsra5 PtMsrb1 PtMsrb3.1<br>PtMsrb5           | 1 | Myb-like protein of <i>Petunia hybrida</i>                                     |
| AtMsra5 AtMsrb1 AtMsrb3 AtMsrb4 AtMsrb5 AtMsrb6 AtMsrb7 AtMsrb8<br>AtMsrb9 AtPMSR1 AtPMSR2 AtPMSR3 AtPMSR4 OsMsra4 OsMsra5 OsMsrb3<br>PtMsra2.1 PtMsra2.2 PtMsra4.1 PtMsra5 PtMsrb1 PtMsrb3.1 PtMsrb3.2              | 1 | Heterodimer of NAC-domain transcription factors GmNAC30 and GmNAC81            |
| AtMsrb1 AtMsrb2 AtMsrb5 AtMsrb6 AtMsrb7 AtMsrb8 AtMsrb9 AtPMSR1<br>AtPMSR2 AtPMSR3 AtPMSR4 OsMsra2.1 OsMsra5 OsMsrb1 OsMsrb3<br>OsMsrb5 PtMsra2.1 PtMsra2.2 PtMsra4.1 PtMsra4.2 PtMsra5 PtMsrb1<br>PtMsrb3.1         | 1 | Myb domain protein 96 (MYBCOV1)                                                |
| AtMsrb2 AtMsrb3 AtMsrb5 AtMsrb6 AtMsrb7 AtMsrb8 AtMsrb9 AtPMSR1<br>AtPMSR2 AtPMSR3 AtPMSR4 OsMsra2.1 OsMsra4 OsMsrb1 OsMsrb5<br>PtMsra2.1 PtMsra2.2 PtMsra4.1 PtMsra4.2 PtMsra5 PtMsrb1 PtMsrb3.1<br>PtMsrb3.2       | 1 | Late elongated hypocotyl 1                                                     |
| AtMsra5 AtMsrb1 AtMsrb2 AtMsrb3 AtMsrb5 AtMsrb7 AtMsrb9 AtPMSR1<br>AtPMSR2 AtPMSR3 OsMsra4 OsMsra5 OsMsrb3 OsMsrb5 PtMsra2.1<br>PtMsra2.2 PtMsra4.1 PtMsra4.2 PtMsra5 PtMsrb1 PtMsrb3.1 PtMsrb3.2<br>PtMsrb5         | 1 | Target of early activation tagged 1 (RAP2.7) (tertiary DNA binding preference) |
| AtMsra5 AtMsrb1 AtMsrb2 AtMsrb3 AtMsrb4 AtMsrb5 AtMsrb6 AtMsrb7<br>AtMsrb8 AtMsrb9 AtPMSR1 AtPMSR2 AtPMSR4 OsMsra2.1 OsMsrb5<br>PtMsra2.1 PtMsra2.2 PtMsra4.1 PtMsra4.2 PtMsra5 PtMsrb1 PtMsrb3.1<br>PtMsrb3.2       | 1 | Yabby transcription factor CRABS CLAW                                          |
| AtMsra5 AtMsrb2 AtMsrb3 AtMsrb4 AtMsrb5 AtMsrb6 AtMsrb7 AtMsrb8<br>AtMsrb9 AtPMSR2 AtPMSR3 AtPMSR4 OsMsra2.1 OsMsra5 OsMsrb5<br>PtMsra2.1 PtMsra2.2 PtMsra4.1 PtMsra5 PtMsrb1 PtMsrb3.1 PtMsrb3.2<br>PtMsrb5         | 1 | AS1/AS2 repressor complex binding motif II                                     |
| AtMsrb1 AtMsrb3 AtMsrb4 AtMsrb5 AtMsrb6 AtMsrb7 AtMsrb8 AtMsrb9<br>AtPMSR1 AtPMSR2 AtPMSR3 AtPMSR4 OsMsra2.1 OsMsra4 OsMsra5<br>OsMsrb1 PtMsra2.1 PtMsra2.2 PtMsra4.1 PtMsrb1 PtMsrb3.1 PtMsrb5                      | 1 | NAC WITH TRANSMEMBRANE MOTIF 1-LIKE 6 (NTL6/NTM1)                              |

|                                                                                                                                                                                                     |   |                                                                                                                          |
|-----------------------------------------------------------------------------------------------------------------------------------------------------------------------------------------------------|---|--------------------------------------------------------------------------------------------------------------------------|
| AtMsrA5 AtMsrB1 AtMsrB2 AtMsrB5 AtMsrB6 AtMsrB7 AtMsrB8 AtMsrB9<br>AtPMSR1 AtPMSR2 AtPMSR3 OsMsrA4 OsMsrB1 OsMsrB3 OsMsrB5<br>PtMsrA2.2 PtMsrA4.1 PtMsrA4.2 PtMsrA5 PtMsrB1 PtMsrB3.1 PtMsrB3.2     | 1 | Storekeeper (STK), plant specific DNA binding protein important for tuber-specific and sucrose-inducible gene expression |
| AtMsrA5 AtMsrB1 AtMsrB3 AtMsrB4 AtMsrB6 AtMsrB7 AtMsrB8 AtMsrB9<br>AtPMSR1 AtPMSR2 AtPMSR3 OsMsrA2.1 OsMsrB3 OsMsrB5 PtMsrA2.1<br>PtMsrA2.2 PtMsrA4.1 PtMsrA4.2 PtMsrA5 PtMsrB3.1 PtMsrB3.2 PtMsrB5 | 1 | Cellular and viral TATA box elements                                                                                     |
| AtMsrB1 AtMsrB2 AtMsrB3 AtMsrB4 AtMsrB5 AtMsrB6 AtMsrB7 AtMsrB8<br>AtMsrB9 AtPMSR1 AtPMSR2 AtPMSR3 OsMsrA4 OsMsrB1 PtMsrA2.2<br>PtMsrA4.1 PtMsrA4.2 PtMsrA5 PtMsrB1 PtMsrB3.1 PtMsrB3.2 PtMsrB5     | 1 | GAAA motif involved in pollen specific transcriptional activation                                                        |
| AtMsrB1 AtMsrB2 AtMsrB3 AtMsrB4 AtMsrB5 AtMsrB6 AtMsrB7 AtMsrB9<br>AtPMSR1 AtPMSR2 AtPMSR3 OsMsrA2.1 OsMsrA4 PtMsrA2.1 PtMsrA2.2<br>PtMsrA4.1 PtMsrA4.2 PtMsrA5 PtMsrB1 PtMsrB3.1 PtMsrB3.2 PtMsrB5 | 1 | Sequence motif from the promoters of different sugar-responsive genes                                                    |
| AtMsrB2 AtMsrB3 AtMsrB4 AtMsrB5 AtMsrB6 AtMsrB8 AtMsrB9 AtPMSR1<br>AtPMSR2 AtPMSR3 OsMsrA2.1 OsMsrA4 OsMsrB5 PtMsrA2.1 PtMsrA2.2<br>PtMsrA4.1 PtMsrA4.2 PtMsrA5 PtMsrB1 PtMsrB3.1 PtMsrB3.2 PtMsrB5 | 1 | Homeobox protein 34                                                                                                      |
| AtMsrB1 AtMsrB2 AtMsrB3 AtMsrB4 AtMsrB5 AtMsrB6 AtMsrB8 AtMsrB9<br>AtPMSR1 AtPMSR3 AtPMSR4 OsMsrA2.1 OsMsrA5 OsMsrB3 PtMsrA2.1<br>PtMsrA2.2 PtMsrA4.1 PtMsrA4.2 PtMsrA5 PtMsrB1 PtMsrB3.1 PtMsrB5   | 1 | Prolamin box, conserved in cereal seed storage protein gene promoters                                                    |
| AtMsrB1 AtMsrB2 AtMsrB3 AtMsrB5 AtMsrB6 AtMsrB8 AtMsrB9 AtPMSR2<br>AtPMSR3 AtPMSR4 OsMsrA2.1 OsMsrA2.2 OsMsrA4 OsMsrB1 OsMsrB3<br>PtMsrA2.1 PtMsrA2.2 PtMsrA4.1 PtMsrA4.2 PtMsrB1 PtMsrB3.2 PtMsrB5 | 1 | bZIP protein G-Box binding factor 1                                                                                      |
| AtMsrB2 AtMsrB3 AtMsrB4 AtMsrB5 AtMsrB6 AtMsrB7 AtMsrB8 AtMsrB9<br>AtPMSR1 AtPMSR2 AtPMSR3 AtPMSR4 OsMsrA4 OsMsrA5 OsMsrB5<br>PtMsrA2.1 PtMsrA2.2 PtMsrA4.2 PtMsrA5 PtMsrB1 PtMsrB3.2               | 1 | Circadian clock associated 1                                                                                             |
| AtMsrA5 AtMsrB1 AtMsrB2 AtMsrB3 AtMsrB4 AtMsrB5 AtMsrB6 AtMsrB8<br>AtMsrB9 AtPMSR1 AtPMSR2 AtPMSR3 OsMsrA2.1 OsMsrA5 OsMsrB5<br>PtMsrA2.1 PtMsrA2.2 PtMsrA4.1 PtMsrA5 PtMsrB1 PtMsrB5               | 1 | Homeobox-leucine zipper protein REVOLUTA (REV, IFL1)                                                                     |
| AtMsrA5 AtMsrB1 AtMsrB3 AtMsrB5 AtMsrB6 AtMsrB7 AtMsrB8 AtMsrB9<br>AtPMSR1 AtPMSR2 AtPMSR3 OsMsrA2.1 OsMsrA5 OsMsrB5 PtMsrA2.1<br>PtMsrA2.2 PtMsrA4.2 PtMsrA5 PtMsrB1 PtMsrB3.2 PtMsrB5             | 1 | Mammalian C-type LTR TATA box                                                                                            |
| AtMsrA5 AtMsrB1 AtMsrB2 AtMsrB3 AtMsrB6 AtMsrB7 AtMsrB8 AtMsrB9<br>AtPMSR1 AtPMSR2 AtPMSR4 OsMsrB1 PtMsrA2.1 PtMsrA2.2 PtMsrA4.1<br>PtMsrA4.2 PtMsrA5 PtMsrB1 PtMsrB3.1 PtMsrB3.2 PtMsrB5           | 1 | AT-hook motif nuclear-localized protein 20                                                                               |
| AtMsrA5 AtMsrB1 AtMsrB4 AtMsrB5 AtMsrB6 AtMsrB7 AtMsrB8 AtMsrB9<br>AtPMSR1 AtPMSR2 AtPMSR4 OsMsrA4 OsMsrB3 OsMsrB5 PtMsrA2.1<br>PtMsrA2.2 PtMsrA4.1 PtMsrA4.2 PtMsrA5 PtMsrB1 PtMsrB5               | 1 | MADS-box protein SQUAMOSA                                                                                                |



|                                                                                                                                                                                             |   |                                                                                                                                     |
|---------------------------------------------------------------------------------------------------------------------------------------------------------------------------------------------|---|-------------------------------------------------------------------------------------------------------------------------------------|
| AtMsrA5 AtMsrB1 AtMsrB2 AtMsrB3 AtMsrB4 AtMsrB6 AtMsrB7 AtMsrB8<br>AtPMSR1 AtPMSR3 AtPMSR4 OsMsrA2.1 OsMsrA4 OsMsrA5 OsMsrB3<br>OsMsrB5 PtMsrA2.1 PtMsrA2.2 PtMsrA5 PtMsrB1 PtMsrB3.1       | 1 | GA-regulated myb gene from barley                                                                                                   |
| AtMsrA5 AtMsrB1 AtMsrB2 AtMsrB3 AtMsrB4 AtMsrB5 AtMsrB6 AtMsrB7<br>AtMsrB8 AtMsrB9 AtPMSR2 AtPMSR3 AtPMSR4 OsMsrA4 OsMsrA5 OsMsrB5<br>PtMsrA5 PtMsrB1 PtMsrB3.1 PtMsrB3.2 PtMsrB5           | 1 | GT2-box and GT3-box motifs                                                                                                          |
| AtMsrA5 AtMsrB1 AtMsrB2 AtMsrB4 AtMsrB6 AtMsrB7 AtMsrB8 AtMsrB9<br>AtPMSR2 AtPMSR3 AtPMSR4 OsMsrA2.1 PtMsrA2.1 PtMsrA2.2 PtMsrA4.1<br>PtMsrA4.2 PtMsrA5 PtMsrB1 PtMsrB3.1 PtMsrB3.2 PtMsrB5 | 1 | WRKY DNA-binding protein 70                                                                                                         |
| AtMsrA5 AtMsrB1 AtMsrB3 AtMsrB5 AtMsrB6 AtMsrB7 AtMsrB8 AtMsrB9<br>AtPMSR2 AtPMSR3 AtPMSR4 OsMsrA4 OsMsrB5 PtMsrA2.1 PtMsrA2.2<br>PtMsrA4.1 PtMsrA4.2 PtMsrA5 PtMsrB3.1 PtMsrB3.2 PtMsrB5   | 1 | Homeobox-leucine zipper protein ATHB-24                                                                                             |
| AtMsrA5 AtMsrB2 AtMsrB3 AtMsrB4 AtMsrB5 AtMsrB6 AtMsrB7 AtMsrB8<br>AtMsrB9 AtPMSR1 AtPMSR2 AtPMSR3 AtPMSR4 OsMsrA2.2 OsMsrB1<br>PtMsrA2.1 PtMsrA2.2 PtMsrA4.1 PtMsrB1 PtMsrB3.1             | 1 | Heat shock element                                                                                                                  |
| AtMsrA5 AtMsrB2 AtMsrB5 AtMsrB6 AtMsrB7 AtMsrB8 AtMsrB9 AtPMSR1<br>AtPMSR2 AtPMSR3 AtPMSR4 OsMsrB1 OsMsrB3 PtMsrA4.1 PtMsrA4.2<br>PtMsrA5 PtMsrB1 PtMsrB3.1 PtMsrB3.2 PtMsrB5               | 1 | TATA-binding protein, general transcription factor that interacts with other factors to form the preinitiation complex at promoters |
| AtMsrA5 AtMsrB1 AtMsrB2 AtMsrB3 AtMsrB4 AtMsrB8 AtPMSR1 AtPMSR2<br>AtPMSR3 OsMsrA4 OsMsrA5 OsMsrB1 PtMsrA2.1 PtMsrA2.2 PtMsrA4.1<br>PtMsrA4.2 PtMsrB1 PtMsrB3.1 PtMsrB3.2 PtMsrB5           | 1 | CCAAT-box in plant promoters                                                                                                        |
| AtMsrB2 AtMsrB3 AtMsrB4 AtMsrB5 AtMsrB6 AtMsrB8 AtMsrB9 AtPMSR1<br>AtPMSR3 AtPMSR4 OsMsrA2.1 OsMsrA4 OsMsrB1 PtMsrA2.1 PtMsrA2.2<br>PtMsrA4.1 PtMsrA5 PtMsrB1 PtMsrB3.1 PtMsrB3.2           | 1 | APETALA2                                                                                                                            |
| AtMsrA5 AtMsrB1 AtMsrB2 AtMsrB3 AtMsrB5 AtMsrB6 AtMsrB8 AtMsrB9<br>AtPMSR1 AtPMSR3 OsMsrB1 OsMsrB5 PtMsrA2.1 PtMsrA2.2 PtMsrA4.1<br>PtMsrA4.2 PtMsrA5 PtMsrB1 PtMsrB3.1 PtMsrB5             | 1 | Lentivirus LTR TATA box                                                                                                             |
| AtMsrB1 AtMsrB2 AtMsrB3 AtMsrB4 AtMsrB5 AtMsrB6 AtMsrB7 AtMsrB9<br>AtPMSR2 AtPMSR3 AtPMSR4 OsMsrA2.1 OsMsrA4 PtMsrA2.1 PtMsrA4.1<br>PtMsrA4.2 PtMsrA5 PtMsrB1 PtMsrB3.1 PtMsrB3.2           | 1 | Circadian clock associated 1 (secondary DNA binding preference)                                                                     |
| AtMsrB1 AtMsrB2 AtMsrB3 AtMsrB4 AtMsrB5 AtMsrB6 AtMsrB8 AtMsrB9<br>AtPMSR2 OsMsrA2.1 OsMsrA5 OsMsrB1 OsMsrB3 OsMsrB5 PtMsrA2.1<br>PtMsrA2.2 PtMsrA4.1 PtMsrA4.2 PtMsrB1 PtMsrB3.2           | 1 | LATE ELONGATED HYPOCOTYL                                                                                                            |
| AtMsrB1 AtMsrB5 AtMsrB6 AtMsrB7 AtMsrB8 AtMsrB9 AtPMSR1 AtPMSR2<br>AtPMSR3 AtPMSR4 OsMsrA2.1 OsMsrA4 PtMsrA2.1 PtMsrA2.2 PtMsrA4.2<br>PtMsrA5 PtMsrB3.1 PtMsrB3.2 PtMsrB5                   | 1 | Zinc finger of Arabidopsis thaliana 6 (Cold induced zinc finger protein 2)                                                          |

|                                                                                                                                                                           |   |                                                                                              |
|---------------------------------------------------------------------------------------------------------------------------------------------------------------------------|---|----------------------------------------------------------------------------------------------|
| AtMsrb1 AtMsrb3 AtMsrb4 AtMsrb5 AtMsrb6 AtMsrb7 AtMsrb8 AtMsrb9<br>AtPMSR1 AtPMSR3 AtPMSR4 OsMsra5 OsMsrb1 OsMsrb3 OsMsrb5<br>PtMsra4.1 PtMsrb1 PtMsrb3.1 PtMsrb3.2       | 1 | Trihelix DNA-binding factor GT-3a                                                            |
| AtMsrb1 AtMsrb2 AtMsrb3 AtMsrb5 AtMsrb6 AtMsrb8 AtMsrb9 AtPMSR2<br>AtPMSR3 AtPMSR4 OsMsra2.1 OsMsra5 PtMsra2.1 PtMsra2.2 PtMsra4.2<br>PtMsra5 PtMsrb1 PtMsrb3.2 PtMsrb5   | 1 | WUSCHEL-related homeobox 13                                                                  |
| AtMsra5 AtMsrb1 AtMsrb4 AtMsrb5 AtMsrb6 AtMsrb7 AtPMSR2 AtPMSR3<br>OsMsra2.1 OsMsra5 OsMsrb1 OsMsrb3 PtMsra2.1 PtMsra2.2 PtMsra4.1<br>PtMsra4.2 PtMsrb1 PtMsrb3.1 PtMsrb5 | 1 | Drosophila initiator motifs                                                                  |
| AtMsrb1 AtMsrb2 AtMsrb5 AtMsrb6 AtMsrb7 AtMsrb8 AtMsrb9 AtPMSR1<br>AtPMSR2 AtPMSR3 OsMsra5 OsMsrb3 OsMsrb5 PtMsra2.1 PtMsra2.2<br>PtMsra4.1 PtMsrb3.1 PtMsrb5             | 1 | S1F, site 1 binding factor of spinach rps1 promoter                                          |
| AtMsrb1 AtMsrb6 AtMsrb8 AtMsrb9 AtPMSR1 AtPMSR2 AtPMSR4 OsMsra4<br>OsMsrb1 OsMsrb5 PtMsra2.1 PtMsra2.2 PtMsra4.1 PtMsra4.2 PtMsra5<br>PtMsrb3.1 PtMsrb3.2 PtMsrb5         | 1 | TESMIN/TSO1-like CXC 6 (At2G20110)                                                           |
| AtMsrb1 AtMsrb2 AtMsrb3 AtMsrb6 AtMsrb7 AtMsrb8 AtMsrb9 AtPMSR1<br>AtPMSR2 OsMsra2.2 OsMsra4 OsMsra5 OsMsrb1 OsMsrb3 PtMsra2.1<br>PtMsra5 PtMsrb1 PtMsrb5                 | 1 | Cis-element involved in SA (salicylic acid) induction of secretion-related genes<br>via NPR1 |
| AtMsrb3 AtMsrb4 AtMsrb5 AtMsrb6 AtMsrb7 AtMsrb8 AtMsrb9 AtPMSR1<br>AtPMSR2 OsMsra2.1 OsMsra4 PtMsra2.1 PtMsra2.2 PtMsra4.1 PtMsra4.2<br>PtMsra5 PtMsrb3.2 PtMsrb5         | 1 | Secondary wall NAC binding elements                                                          |
| AtMsra5 AtMsrb1 AtMsrb2 AtMsrb9 AtPMSR1 AtPMSR3 AtPMSR4<br>OsMsra2.1 OsMsra4 OsMsra5 OsMsrb3 OsMsrb5 PtMsra2.1 PtMsra4.1<br>PtMsrb1 PtMsrb3.1 PtMsrb3.2 PtMsrb5           | 1 | Myb domain protein r1 (ATMYB44)                                                              |
| AtMsrb1 AtMsrb2 AtMsrb3 AtMsrb5 AtMsrb8 AtPMSR1 AtPMSR3 AtPMSR4<br>OsMsra2.2 OsMsra4 OsMsra5 OsMsrb1 OsMsrb3 OsMsrb5 PtMsra4.2<br>PtMsrb1 PtMsrb3.1 PtMsrb3.2             | 1 | GAZ-like 3 (AT5G22990)                                                                       |
| AtMsra5 AtMsrb2 AtMsrb5 AtMsrb6 AtMsrb7 AtPMSR1 AtPMSR3 OsMsra2.1<br>OsMsra4 OsMsrb3 OsMsrb5 PtMsra2.1 PtMsra4.1 PtMsra4.2 PtMsra5<br>PtMsrb1 PtMsrb3.1 PtMsrb3.2         | 1 | KH and zinc finger CCCH domain-containing protein                                            |
| AtMsrb1 AtMsrb2 AtMsrb4 AtMsrb5 AtMsrb6 AtMsrb8 AtMsrb9 AtPMSR1<br>AtPMSR3 OsMsrb3 PtMsra2.1 PtMsra2.2 PtMsra4.1 PtMsra4.2 PtMsra5<br>PtMsrb3.1 PtMsrb3.2 PtMsrb5         | 1 | Soybean embryo factor 4                                                                      |
| AtMsra5 AtMsrb1 AtMsrb2 AtMsrb3 AtMsrb4 AtMsrb5 AtMsrb6 AtMsrb8<br>AtMsrb9 AtPMSR1 AtPMSR4 OsMsra2.1 OsMsrb1 OsMsrb3 PtMsra2.2<br>PtMsra4.1 PtMsra5 PtMsrb5               | 1 | Arabidopsis 6b-interacting protein 1-like 1                                                  |

|                                                                                                                                                               |   |                                                                                                      |
|---------------------------------------------------------------------------------------------------------------------------------------------------------------|---|------------------------------------------------------------------------------------------------------|
| AtMsrb2 AtMsrb6 AtMsrb7 AtMsrb8 AtMsrb9 AtPMSR1 AtPMSR4 OsMsra2.1 OsMsrb1 OsMsrb5 PtMsra2.1 PtMsra2.2 PtMsra4.1 PtMsra4.2 PtMsra5 PtMsrb3.1 PtMsrb3.2 PtMsrb5 | 1 | Evening element                                                                                      |
| AtMsra5 AtMsrb1 AtMsrb2 AtMsrb3 AtMsrb5 AtMsrb6 AtMsrb7 AtMsrb9 AtPMSR2 AtPMSR3 OsMsra2.1 OsMsra4 OsMsra5 OsMsrb5 PtMsra5 PtMsrb3.1 PtMsrb3.2 PtMsrb5         | 1 | Dof3 - single zinc finger transcription factor                                                       |
| AtMsra5 AtMsrb1 AtMsrb2 AtMsrb3 AtMsrb6 AtMsrb8 AtMsrb9 AtPMSR2 AtPMSR3 OsMsrb1 OsMsrb3 OsMsrb5 PtMsra2.1 PtMsra4.2 PtMsra5 PtMsrb1 PtMsrb3.2 PtMsrb5         | 1 | Zea mays MYB-related protein 1 (transfer cell specific)                                              |
| AtMsra5 AtMsrb5 AtMsrb6 AtMsrb7 AtMsrb8 AtMsrb9 AtPMSR3 OsMsra2.1 OsMsra4 PtMsra2.1 PtMsra2.2 PtMsra4.1 PtMsra4.2 PtMsra5 PtMsrb1 PtMsrb3.1 PtMsrb3.2 PtMsrb5 | 1 | Homeobox-leucine zipper protein ATHB-23                                                              |
| AtMsrb1 AtMsrb3 AtMsrb4 AtMsrb7 AtPMSR1 AtPMSR2 AtPMSR3 AtPMSR4 OsMsra2.1 OsMsra2.2 OsMsra5 OsMsrb1 OsMsrb3 PtMsra2.1 PtMsra2.2 PtMsrb3.1 PtMsrb3.2           | 1 | Type-B response regulator (ARR10), member of the GARP-family of plant myb-related DNA binding motifs |
| AtMsrb1 AtMsrb2 AtMsrb3 AtMsrb4 AtMsrb8 AtMsrb9 AtPMSR1 AtPMSR2 AtPMSR3 OsMsra2.1 OsMsra2.2 OsMsra4 OsMsra5 OsMsrb3 PtMsra2.1 PtMsrb3.1 PtMsrb3.2             | 1 | Myb-related protein 3R-1 (PC-MYB1)                                                                   |
| AtMsrb4 AtMsrb5 AtMsrb6 AtMsrb7 AtMsrb8 AtMsrb9 AtPMSR1 AtPMSR2 AtPMSR3 OsMsra2.1 OsMsra4 PtMsra2.2 PtMsra4.1 PtMsra4.2 PtMsrb1 PtMsrb3.2 PtMsrb5             | 1 | Heat stress transcription factor B-3                                                                 |
| AtMsra5 AtMsrb1 AtMsrb2 AtMsrb3 AtMsrb4 AtMsrb5 AtMsrb6 AtMsrb7 AtMsrb8 AtMsrb9 AtPMSR1 AtPMSR2 OsMsra2.1 OsMsra4 OsMsra5 PtMsra4.2 PtMsra5                   | 1 | Maize INDETERMINATE1 zinc finger protein                                                             |
| AtMsra5 AtMsrb3 AtMsrb4 AtMsrb6 AtMsrb8 AtPMSR1 AtPMSR3 AtPMSR4 OsMsra2.1 OsMsra4 OsMsra5 OsMsrb1 PtMsra2.1 PtMsra2.2 PtMsra5 PtMsrb3.1 PtMsrb5               | 1 | Calmodulin-binding NAC protein                                                                       |
| AtMsrb1 AtMsrb4 AtMsrb5 AtMsrb6 AtMsrb7 AtMsrb8 AtMsrb9 AtPMSR1 AtPMSR3 AtPMSR4 OsMsra2.1 OsMsra5 OsMsrb5 PtMsra4.1 PtMsrb1 PtMsrb3.1 PtMsrb3.2               | 1 | Myb domain protein 98                                                                                |
| AtMsra5 AtMsrb1 AtMsrb2 AtMsrb3 AtMsrb4 AtMsrb5 AtMsrb7 AtMsrb9 AtPMSR1 AtPMSR4 OsMsra2.1 OsMsrb1 OsMsrb3 PtMsra2.1 PtMsrb1 PtMsrb3.1 PtMsrb5                 | 1 | NAC with transmembrane motif 1-like 8 (NTL8/NTM1-like 8)                                             |
| AtMsrb1 AtMsrb3 AtMsrb4 AtMsrb5 AtMsrb7 AtMsrb8 AtPMSR1 OsMsra2.1 OsMsra4 OsMsra5 OsMsrb1 OsMsrb3 OsMsrb5 PtMsra2.1 PtMsra4.2 PtMsrb3.2 PtMsrb5               | 1 | Squamosa promoter-binding-like protein 9                                                             |

|                                                                                                                                                           |   |                                                                                                                                       |
|-----------------------------------------------------------------------------------------------------------------------------------------------------------|---|---------------------------------------------------------------------------------------------------------------------------------------|
| AtMsrA5 AtMsrB1 AtMsrB2 AtMsrB4 AtMsrB6 AtMsrB7 AtMsrB8 AtPMSR2<br>AtPMSR3 AtPMSR4 OsMsrA5 OsMsrB1 PtMsrA2.1 PtMsrA4.1 PtMsrB3.1<br>PtMsrB3.2 PtMsrB5     | 1 | Motif similar to the conserved 8 bp distal element of the 43 bp pseudo-palindromic nitrogen response element (NRE)                    |
| AtMsrA5 AtMsrB1 AtMsrB5 AtMsrB6 AtMsrB8 AtPMSR2 AtPMSR3 AtPMSR4<br>OsMsrA4 OsMsrB1 PtMsrA2.1 PtMsrA2.2 PtMsrA4.2 PtMsrB1 PtMsrB3.1<br>PtMsrB3.2 PtMsrB5   | 1 | Myb domain protein 107                                                                                                                |
| AtMsrB1 AtMsrB2 AtMsrB4 AtMsrB5 AtMsrB6 AtMsrB9 AtPMSR2 AtPMSR3<br>AtPMSR4 OsMsrA4 OsMsrA5 PtMsrA2.1 PtMsrA2.2 PtMsrA4.1 PtMsrA4.2<br>PtMsrA5 PtMsrB3.2   | 1 | Telomere repeat-binding protein 5                                                                                                     |
| AtMsrA5 AtMsrB1 AtMsrB3 AtMsrB4 AtMsrB5 AtMsrB6 AtMsrB7 AtPMSR2<br>AtPMSR3 OsMsrA2.1 OsMsrA5 OsMsrB5 PtMsrA2.1 PtMsrA4.2 PtMsrB1<br>PtMsrB3.1 PtMsrB5     | 1 | AGL15, Arabidopsis MADS-domain protein AGAMOUS-like 15                                                                                |
| AtMsrA5 AtMsrB1 AtMsrB2 AtMsrB3 AtMsrB4 AtMsrB5 AtMsrB6 AtMsrB9<br>AtPMSR2 OsMsrA4 OsMsrB1 OsMsrB3 OsMsrB5 PtMsrA5 PtMsrB1 PtMsrB3.1<br>PtMsrB3.2         | 1 | PBF (MPBF)                                                                                                                            |
| AtMsrA5 AtMsrB1 AtMsrB2 AtMsrB3 AtMsrB4 AtMsrB6 AtMsrB8 AtPMSR2<br>OsMsrA2.1 OsMsrA5 OsMsrB1 OsMsrB3 PtMsrA2.2 PtMsrA4.2 PtMsrA5<br>PtMsrB1 PtMsrB3.1     | 1 | NAC domain containing protein 103                                                                                                     |
| AtMsrB1 AtMsrB4 AtMsrB5 AtMsrB6 AtMsrB7 AtMsrB8 AtPMSR2 OsMsrA2.1<br>OsMsrA4 OsMsrB3 OsMsrB5 PtMsrA2.1 PtMsrA2.2 PtMsrA4.1 PtMsrB3.1<br>PtMsrB3.2 PtMsrB5 | 1 | DNA-binding protein of sweet potato that binds to the SP8a (ACTGTGTA) and SP8b (TACTATT) sequences of sporamin and beta-amylase genes |
| AtMsrB1 AtMsrB2 AtMsrB4 AtMsrB6 AtMsrB7 AtMsrB8 AtMsrB9 AtPMSR3<br>AtPMSR4 OsMsrA2.1 OsMsrA5 OsMsrB5 PtMsrA2.2 PtMsrA4.1 PtMsrA4.2<br>PtMsrB1 PtMsrB5     | 1 | Early Flowering MYB Protein (AT2G03500)                                                                                               |
| AtMsrA5 AtMsrB2 AtMsrB4 AtMsrB5 AtMsrB6 AtMsrB8 AtMsrB9 AtPMSR1<br>AtPMSR2 AtPMSR4 OsMsrA2.1 OsMsrB1 OsMsrB3 PtMsrA2.2 PtMsrA5<br>PtMsrB3.1               | 1 | ICE (inducer of CBF expression 1), AtMYC2 (rd22BP1)                                                                                   |
| AtMsrB2 AtMsrB3 AtMsrB4 AtMsrB6 AtMsrB7 AtPMSR1 AtPMSR2 AtPMSR4<br>OsMsrA2.1 OsMsrA5 OsMsrB5 PtMsrA2.1 PtMsrA2.2 PtMsrA4.2 PtMsrB1<br>PtMsrB5             | 1 | Phosphate starvation response 1                                                                                                       |
| AtMsrA5 AtMsrB1 AtMsrB3 AtMsrB5 AtMsrB6 AtMsrB7 AtMsrB8 AtMsrB9<br>AtPMSR1 AtPMSR2 OsMsrA4 OsMsrA5 PtMsrA2.1 PtMsrA2.2 PtMsrA5<br>PtMsrB5                 | 1 | Homeobox-leucine zipper protein ATHB-6                                                                                                |
| AtMsrA5 AtMsrB3 AtMsrB4 AtMsrB6 AtMsrB7 AtMsrB8 AtMsrB9 AtPMSR1<br>AtPMSR2 OsMsrA2.1 OsMsrA4 PtMsrA2.1 PtMsrA2.2 PtMsrA5 PtMsrB1<br>PtMsrB3.2             | 1 | NAC domain containing protein 5                                                                                                       |

|                                                                                                                                                   |   |                                                                                                                   |
|---------------------------------------------------------------------------------------------------------------------------------------------------|---|-------------------------------------------------------------------------------------------------------------------|
| AtMsra5 AtMsrb1 AtMsrb3 AtMsrb4 AtMsrb7 AtMsrb9 AtPMSR1 AtPMSR3<br>AtPMSR4 OsMsrb1 OsMsrb3 PtMsra2.1 PtMsra2.2 PtMsra4.1 PtMsra4.2<br>PtMsra5     | 1 | Dof1 / MNB1a - single zinc finger transcription factor                                                            |
| AtMsrb3 AtMsrb6 AtMsrb7 AtMsrb8 AtMsrb9 AtPMSR1 AtPMSR3 AtPMSR4<br>OsMsra2.1 OsMsra4 OsMsrb5 PtMsra2.1 PtMsra5 PtMsrb1 PtMsrb3.1<br>PtMsrb5       | 1 | Botrytis-susceptible1 (MYB108)                                                                                    |
| AtMsrb4 AtMsrb5 AtMsrb6 AtMsrb7 AtMsrb8 AtPMSR1 AtPMSR3 AtPMSR4<br>OsMsra4 OsMsra5 OsMsrb1 OsMsrb5 PtMsra2.1 PtMsra4.2 PtMsrb1 PtMsrb5            | 1 | Myb domain protein 3R-4                                                                                           |
| AtMsra5 AtMsrb5 AtMsrb6 AtMsrb7 AtMsrb8 AtMsrb9 AtPMSR1 OsMsrb1<br>PtMsra2.1 PtMsra2.2 PtMsra4.1 PtMsra4.2 PtMsra5 PtMsrb1 PtMsrb3.1<br>PtMsrb3.2 | 1 | High mobility group I/Y-like proteins                                                                             |
| AtMsra5 AtMsrb1 AtMsrb2 AtMsrb5 AtMsrb8 AtPMSR2 AtPMSR3 AtPMSR4<br>OsMsra2.1 OsMsra2.2 OsMsra4 OsMsrb1 PtMsra4.1 PtMsra4.2 PtMsrb3.2<br>PtMsrb5   | 1 | Transcription factor of rice and barley binding to the iron deficiency-<br>responsive cis-acting element 2 (IDE2) |
| AtMsra5 AtMsrb2 AtMsrb3 AtMsrb7 AtMsrb8 AtMsrb9 AtPMSR2 AtPMSR3<br>AtPMSR4 OsMsra2.2 OsMsrb3 PtMsra2.1 PtMsra4.2 PtMsra5 PtMsrb3.1<br>PtMsrb5     | 1 | NIN-binding nucleotide sequences                                                                                  |
| AtMsra5 AtMsrb2 AtMsrb7 AtMsrb8 AtPMSR2 AtPMSR3 AtPMSR4 OsMsra5<br>OsMsrb1 OsMsrb5 PtMsra2.1 PtMsra2.2 PtMsra4.2 PtMsra5 PtMsrb3.2<br>PtMsrb5     | 1 | Zinc-dependent activator protein-1, WRKY 1                                                                        |
| AtMsra5 AtMsrb1 AtMsrb2 AtMsrb3 AtMsrb9 AtPMSR2 AtPMSR3 OsMsra2.1<br>OsMsra4 PtMsra2.1 PtMsra2.2 PtMsra4.1 PtMsra5 PtMsrb1 PtMsrb3.1<br>PtMsrb5   | 1 | WRKY DNA-binding protein 50                                                                                       |
| AtMsrb1 AtMsrb2 AtMsrb4 AtMsrb5 AtMsrb6 AtMsrb7 AtMsrb9 AtPMSR2<br>AtPMSR3 OsMsra2.1 OsMsra4 PtMsra2.1 PtMsra2.2 PtMsra4.1 PtMsra5<br>PtMsrb3.1   | 1 | NAC with transmembrane motif 1                                                                                    |
| AtMsra5 AtMsrb1 AtMsrb5 AtMsrb7 AtPMSR2 AtPMSR4 OsMsra2.1<br>OsMsra2.2 OsMsra4 OsMsra5 OsMsrb5 PtMsra2.1 PtMsra4.1 PtMsra4.2<br>PtMsra5 PtMsrb3.2 | 1 | Opaque-2 regulatory protein                                                                                       |
| AtMsra5 AtMsrb1 AtMsrb2 AtMsrb6 AtMsrb8 AtMsrb9 AtPMSR2 OsMsra2.1<br>OsMsra4 PtMsra2.1 PtMsra2.2 PtMsra4.1 PtMsra4.2 PtMsrb1 PtMsrb3.1<br>PtMsrb5 | 1 | Trihelix transcription factor GTL1                                                                                |
| AtMsra5 AtMsrb2 AtMsrb3 AtMsrb4 AtMsrb5 AtMsrb7 AtMsrb9 AtPMSR2<br>OsMsra4 OsMsrb5 PtMsra2.2 PtMsra4.1 PtMsra4.2 PtMsra5 PtMsrb1<br>PtMsrb5       | 1 | Muscle TATA box                                                                                                   |
| AtMsrb2 AtMsrb3 AtMsrb5 AtMsrb6 AtMsrb7 AtPMSR3 OsMsra4 OsMsra5<br>OsMsrb5 PtMsra2.1 PtMsra2.2 PtMsra4.1 PtMsra5 PtMsrb1 PtMsrb3.1<br>PtMsrb3.2   | 1 | Myb family transcription factor At3g10113                                                                         |

|                                                                                                                                                            |   |                                                                                                       |
|------------------------------------------------------------------------------------------------------------------------------------------------------------|---|-------------------------------------------------------------------------------------------------------|
| AtMsra5 AtMsraB1 AtMsraB2 AtMsraB3 AtMsraB4 AtMsraB5 AtMsraB6 AtMsraB7<br>AtMsraB9 OsMsraA2.1 OsMsraA5 OsMsraB1 OsMsraB3 PtMsraA2.1 PtMsraB3.2<br>PtMsraB5 | 1 | Recognition site for BZIP transcription factors that belong to the group of<br>Opaque-2 like proteins |
| AtMsra5 AtMsraB6 AtMsraB7 AtMsraB9 AtPMSR1 AtPMSR2 AtPMSR3 AtPMSR4<br>OsMsraB1 PtMsraA2.1 PtMsraA2.2 PtMsraA4.2 PtMsraA5 PtMsraB3.1 PtMsraB5               | 1 | Secondary wall MYB-responsive element, MYB46 and MYB83 binding sites                                  |
| AtMsraB2 AtMsraB3 AtMsraB5 AtMsraB7 AtMsraB9 AtPMSR1 AtPMSR2 AtPMSR3<br>AtPMSR4 OsMsraA2.1 OsMsraB1 OsMsraB3 PtMsraA4.2 PtMsraA5 PtMsraB1                  | 1 | WRKY plant specific zinc-finger-type factor associated with pathogen defence,<br>W box                |
| AtMsra5 AtMsraB1 AtMsraB2 AtMsraB3 AtMsraB5 AtMsraB6 AtMsraB9 AtPMSR1<br>AtPMSR2 AtPMSR4 OsMsraA5 PtMsraA2.2 PtMsraA4.1 PtMsraA4.2 PtMsraB1                | 1 | Myb domain protein 52                                                                                 |
| AtMsra5 AtMsraB3 AtMsraB4 AtMsraB6 AtMsraB7 AtMsraB9 AtPMSR1 AtPMSR2<br>AtPMSR4 OsMsraA4 OsMsraA5 OsMsraB5 PtMsraA2.1 PtMsraA4.2 PtMsraB5                  | 1 | B3 domain-containing transcription factor FUS3                                                        |
| AtMsraB1 AtMsraB3 AtMsraB4 AtMsraB5 AtMsraB7 AtMsraB8 AtMsraB9 AtPMSR1<br>AtPMSR2 OsMsraA2.2 OsMsraA5 OsMsraB3 PtMsraA5 PtMsraB1 PtMsraB5                  | 1 | RWP-RK domain containing 2                                                                            |
| AtMsraB2 AtMsraB4 AtMsraB5 AtMsraB6 AtMsraB7 AtMsraB9 AtPMSR1 AtPMSR2<br>OsMsraA2.1 OsMsraA2.2 OsMsraA5 OsMsraB3 PtMsraA2.2 PtMsraB1 PtMsraB5              | 1 | Growth-regulating factor 9                                                                            |
| AtMsra5 AtMsraB1 AtMsraB2 AtMsraB7 AtMsraB8 AtMsraB9 AtPMSR1 AtPMSR3<br>AtPMSR4 OsMsraA5 OsMsraB3 OsMsraB5 PtMsraA2.1 PtMsraA2.2 PtMsraA4.1                | 1 | NAC domain containing protein 3                                                                       |
| AtMsra5 AtMsraB1 AtMsraB2 AtMsraB3 AtMsraB6 AtMsraB7 AtMsraB8 AtMsraB9<br>AtPMSR1 AtPMSR4 OsMsraA2.2 OsMsraA5 OsMsraB1 PtMsraA2.2 PtMsraA4.2               | 1 | Nodulin consensus sequence 2                                                                          |
| AtMsra5 AtMsraB2 AtMsraB3 AtMsraB5 AtMsraB7 AtPMSR2 AtPMSR3 OsMsraA2.1<br>PtMsraA2.1 PtMsraA2.2 PtMsraA4.2 PtMsraA5 PtMsraB1 PtMsraB3.1 PtMsraB5           | 1 | GT1-Box binding factors with a trihelix DNA-binding domain                                            |
| AtMsraB2 AtMsraB6 AtMsraB7 AtMsraB9 AtPMSR2 AtPMSR3 OsMsraA2.1<br>OsMsraA2.2 OsMsraA4 OsMsraA5 OsMsraB1 OsMsraB3 OsMsraB5 PtMsraA4.2<br>PtMsraB1           | 1 | Brassinazole-resistant 1                                                                              |
| AtMsraB1 AtMsraB2 AtMsraB4 AtMsraB6 AtMsraB7 AtMsraB9 AtPMSR2 AtPMSR4<br>OsMsraA2.2 OsMsraA5 PtMsraA2.1 PtMsraA5 PtMsraB1 PtMsraB3.1 PtMsraB5              | 1 | Hormone up-regulated at dawn element                                                                  |
| AtMsraB5 AtMsraB6 AtMsraB7 AtMsraB9 AtPMSR4 OsMsraA2.2 OsMsraA4 OsMsraA5<br>OsMsraB1 PtMsraA4.1 PtMsraA4.2 PtMsraB1 PtMsraB3.1 PtMsraB3.2 PtMsraB5         | 1 | Arabidopsis NAC domain containing protein 19                                                          |
| AtMsraB3 AtMsraB4 AtMsraB5 AtMsraB6 AtMsraB7 AtPMSR1 AtPMSR2 AtPMSR3<br>AtPMSR4 OsMsraB3 OsMsraB5 PtMsraA2.1 PtMsraA5 PtMsraB1                             | 1 | Tracheary-element-regulating cis-element                                                              |
| AtMsraB6 AtMsraB7 AtMsraB9 AtPMSR1 AtPMSR2 AtPMSR3 AtPMSR4 OsMsraA5<br>OsMsraB1 OsMsraB5 PtMsraA2.1 PtMsraA4.1 PtMsraB3.1 PtMsraB3.2                       | 1 | Myb domain protein 49                                                                                 |
| AtMsraB1 AtMsraB2 AtMsraB4 AtMsraB5 AtMsraB6 AtMsraB7 AtMsraB8 AtPMSR1<br>AtPMSR2 AtPMSR3 OsMsraA4 OsMsraA5 PtMsraA5 PtMsraB1                              | 1 | Myb family transcription factor (G2-like family)                                                      |
| AtMsraB1 AtMsraB2 AtMsraB3 AtMsraB8 AtMsraB9 AtPMSR1 AtPMSR2 AtPMSR4<br>OsMsraA2.2 OsMsraA4 PtMsraA4.2 PtMsraB1 PtMsraB3.2 PtMsraB5                        | 1 | NAC WITH TRANSMEMBRANE MOTIF 1-LIKE 8 (NTL8/NTM1-like 8)                                              |
| AtMsra5 AtMsraB1 AtMsraB3 AtMsraB4 AtMsraB6 AtMsraB7 AtMsraB8 AtMsraB9<br>AtPMSR1 AtPMSR2 OsMsraA2.1 OsMsraB1 PtMsraA2.1 PtMsraA5                          | 1 | NAC domain containing protein 4                                                                       |

|                                                                                                                             |   |                                                                    |
|-----------------------------------------------------------------------------------------------------------------------------|---|--------------------------------------------------------------------|
| AtMsrb1 AtMsrb5 AtMsrb7 AtMsrb8 AtMsrb9 AtPMSR1 AtPMSR2 PtMsra2.1 PtMsra2.2 PtMsra4.1 PtMsra4.2 PtMsra5 PtMsrb1 PtMsrb5     | 1 | Homeobox 51, Late Meristem Identity 1                              |
| AtMsra5 AtMsrb2 AtMsrb3 AtMsrb4 AtMsrb5 AtMsrb7 AtPMSR1 AtPMSR3 AtPMSR4 OsMsra2.2 OsMsra4 OsMsrb3 PtMsra2.1 PtMsra2.2       | 1 | Basic pentacysteine proteins                                       |
| AtMsra5 AtMsrb1 AtMsrb2 AtMsrb3 AtMsrb6 AtMsrb7 AtMsrb8 AtPMSR1 AtPMSR4 OsMsra5 OsMsrb5 PtMsra4.1 PtMsrb3.1 PtMsrb5         | 1 | Wheat NAC-domain DNA binding factor (DNA binding site II)          |
| AtMsrb1 AtMsrb2 AtMsrb9 AtPMSR1 AtPMSR4 OsMsra2.2 OsMsra5 OsMsrb1 OsMsrb3 OsMsrb5 PtMsra2.1 PtMsra4.2 PtMsrb3.1 PtMsrb3.2   | 1 | Oryza sativa CaM-binding transcription factor                      |
| AtMsra5 AtMsrb3 AtMsrb4 AtMsrb5 AtPMSR2 AtPMSR3 AtPMSR4 OsMsra2.1 OsMsra2.2 OsMsra4 OsMsra5 OsMsrb1 OsMsrb3 PtMsrb5         | 1 | Arabidopsis 6B-interacting protein 1-like 2 (AT3G14180)            |
| AtMsra5 AtMsrb2 AtMsrb4 AtMsrb7 AtMsrb8 AtPMSR2 AtPMSR3 OsMsra2.1 OsMsra5 OsMsrb1 PtMsra2.1 PtMsra5 PtMsrb1 PtMsrb3.2       | 1 | Paired amphipathic helix domain-containing protein                 |
| AtMsrb1 AtMsrb3 AtMsrb7 AtMsrb8 AtMsrb9 AtPMSR2 AtPMSR3 OsMsrb3 OsMsrb5 PtMsra4.1 PtMsrb1 PtMsrb3.1 PtMsrb3.2 PtMsrb5       | 1 | Protein ethylene insensitive 3                                     |
| AtMsrb2 AtMsrb3 AtMsrb5 AtPMSR2 AtPMSR3 OsMsra2.1 OsMsra4 OsMsra5 OsMsrb5 PtMsra2.1 PtMsra4.1 PtMsra4.2 PtMsra5 PtMsrb3.2   | 1 | Telomere binding protein 3 (TRB2)                                  |
| AtMsra5 AtMsrb1 AtMsrb2 AtMsrb3 AtMsrb4 AtPMSR2 AtPMSR4 OsMsra2.1 OsMsra5 OsMsrb3 OsMsrb5 PtMsra2.1 PtMsra4.1 PtMsrb3.1     | 1 | ETTIN (Auxin Response Factor 3)                                    |
| AtMsrb1 AtMsrb2 AtMsrb5 AtMsrb8 AtPMSR2 AtPMSR4 OsMsra2.1 OsMsra2.2 PtMsra2.1 PtMsra4.1 PtMsra4.2 PtMsrb1 PtMsrb3.2 PtMsrb5 | 1 | Phytochrome interacting factor3-like 5                             |
| AtMsra5 AtMsrb3 AtMsrb6 AtMsrb7 AtMsrb8 AtPMSR3 AtPMSR4 OsMsra2.1 OsMsra4 OsMsra5 OsMsrb3 OsMsrb5 PtMsrb3.1 PtMsrb5         | 1 | NACL-inducible gene 1                                              |
| AtMsra5 AtMsrb2 AtMsrb4 AtMsrb6 AtMsrb7 AtMsrb8 AtMsrb9 AtPMSR3 OsMsra2.1 OsMsra5 OsMsrb3 OsMsrb5 PtMsra2.1 PtMsrb1         | 1 | AP2/ERF and B3 domain-containing transcription factor RAV1         |
| AtMsra5 AtMsrb2 AtMsrb4 AtMsrb6 AtMsrb7 AtMsrb8 AtPMSR3 OsMsra2.1 OsMsra4 OsMsrb1 OsMsrb3 PtMsra4.1 PtMsra4.2 PtMsrb3.2     | 1 | Morning element (sequence motifs enriched in morning-phased genes) |
| AtMsrb1 AtMsrb3 AtMsrb7 AtMsrb8 AtMsrb9 AtPMSR1 AtPMSR2 AtPMSR4 OsMsra4 OsMsra5 OsMsrb3 PtMsrb1 PtMsrb3.2                   | 1 | NAC domain containing protein 71                                   |
| AtMsra5 AtMsrb1 AtMsrb3 AtMsrb5 AtMsrb7 AtMsrb9 AtPMSR1 AtPMSR2 OsMsrb5 PtMsra2.1 PtMsra4.2 PtMsra5 PtMsrb3.2               | 1 | Homeobox-leucine zipper protein ATHB-15 (INCURVATA 4)              |
| AtMsra5 AtMsrb1 AtMsrb3 AtMsrb5 AtPMSR1 AtPMSR2 OsMsra2.2 OsMsra4 OsMsra5 OsMsrb1 OsMsrb5 PtMsra2.2 PtMsrb3.1               | 1 | Shoot-apical-meristem arrest 2 (AT5G08750)                         |
| AtMsra5 AtMsrb6 AtMsrb7 AtPMSR1 AtPMSR2 OsMsrb1 PtMsra2.2 PtMsra4.1 PtMsra4.2 PtMsrb1 PtMsrb3.1 PtMsrb3.2 PtMsrb5           | 1 | Homeobox-leucine zipper protein ATHB-5                             |
| AtMsrb2 AtMsrb4 AtMsrb6 AtMsrb9 AtPMSR1 AtPMSR2 OsMsra2.1 OsMsra5 OsMsrb1 OsMsrb5 PtMsra2.2 PtMsra4.1 PtMsrb3.2             | 1 | Myb domain protein 99 (ATMYBCU15)                                  |
| AtMsrb2 AtMsrb3 AtMsrb4 AtMsrb7 AtPMSR1 AtPMSR3 AtPMSR4 OsMsrb5 PtMsra2.1 PtMsra2.2 PtMsra4.1 PtMsra4.2 PtMsrb1             | 1 | PHR1-like 2 (G2-like family)(AT3G24120)                            |

|                                                                                                                      |   |                                                                                                               |
|----------------------------------------------------------------------------------------------------------------------|---|---------------------------------------------------------------------------------------------------------------|
| AtMsrb1 AtMsrb2 AtMsrb8 AtPMSR1 AtPMSR4 OsMsra2.1 OsMsra2.2<br>OsMsra5 OsMsrb1 PtMsra4.1 PtMsra4.2 PtMsrb1 PtMsrb3.2 | 1 | Rice transcription activator-1 (RITA), basic leucine zipper protein, highly expressed during seed development |
| AtMsrb2 AtMsrb3 AtMsrb5 AtMsrb7 AtMsrb8 AtMsrb9 AtPMSR1 AtPMSR4<br>OsMsra4 PtMsra4.1 PtMsra4.2 PtMsrb3.1 PtMsrb3.2   | 1 | Homeodomain glabrous 9                                                                                        |
| AtMsrb2 AtMsrb5 AtMsrb7 AtMsrb8 AtMsrb9 AtPMSR1 AtPMSR4 OsMsra2.1<br>OsMsra4 OsMsra5 PtMsra2.1 PtMsra4.1 PtMsra4.2   | 1 | Myb domain protein 57                                                                                         |
| AtMsra5 AtMsrb1 AtMsrb3 AtMsrb5 AtPMSR2 AtPMSR3 AtPMSR4 OsMsra4<br>PtMsra2.1 PtMsra4.2 PtMsra5 PtMsrb1 PtMsrb5       | 1 | 5'-part of bipartite RAV1 binding site, interacting with AP2 domain                                           |
| AtMsra5 AtMsrb4 AtMsrb7 AtMsrb9 AtPMSR2 AtPMSR3 AtPMSR4 OsMsra4<br>OsMsrb5 PtMsra5 PtMsrb1 PtMsrb3.2 PtMsrb5         | 1 | Arabidopsis thaliana meristem layer 1                                                                         |
| AtMsrb2 AtMsrb3 AtMsrb6 AtMsrb7 AtMsrb9 AtPMSR2 AtPMSR3 OsMsra5<br>OsMsrb5 PtMsra4.1 PtMsra4.2 PtMsrb1 PtMsrb5       | 1 | KANADI 4 (Aberrant Testa Shape)                                                                               |
| AtMsra5 AtMsrb6 AtMsrb7 AtMsrb9 AtPMSR2 AtPMSR4 OsMsra5 OsMsrb3<br>PtMsra2.1 PtMsra4.2 PtMsra5 PtMsrb1 PtMsrb3.1     | 1 | CA-rich element                                                                                               |
| AtMsrb3 AtMsrb4 AtMsrb8 AtMsrb9 AtPMSR2 AtPMSR4 OsMsrb5 PtMsra2.2<br>PtMsra4.1 PtMsra4.2 PtMsra5 PtMsrb1 PtMsrb3.2   | 1 | L1-specific homeodomain protein ATML1 (A. thaliana meristem layer 1)                                          |
| AtMsra5 AtMsrb1 AtMsrb3 AtMsrb5 AtMsrb6 AtMsrb7 AtMsrb9 AtPMSR2<br>PtMsra2.1 PtMsra2.2 PtMsra4.2 PtMsra5 PtMsrb1     | 1 | PHAVOLUTA (Homeobox-leucine zipper protein ATHB-9)                                                            |
| AtMsra5 AtMsrb1 AtMsrb6 AtMsrb8 AtPMSR2 OsMsra2.1 OsMsra4 OsMsrb1<br>PtMsra2.1 PtMsra2.2 PtMsra4.1 PtMsra4.2 PtMsrb1 | 1 | Binding sites for AP1, AP3-PI and AG dimers                                                                   |
| AtMsrb1 AtMsrb3 AtMsrb4 AtMsrb5 AtMsrb6 AtMsrb7 AtMsrb9 AtPMSR2<br>OsMsra2.1 OsMsrb3 PtMsra4.1 PtMsra4.2 PtMsrb5     | 1 | AG-motif binding protein 1                                                                                    |
| AtMsrb7 AtMsrb8 AtMsrb9 AtPMSR3 OsMsra2.1 OsMsra4 OsMsra5 OsMsrb5<br>PtMsra2.1 PtMsra2.2 PtMsra4.1 PtMsrb1 PtMsrb3.2 | 1 | Male sterile 188 (MYB103)                                                                                     |
| AtMsra5 AtMsrb1 AtMsrb3 AtMsrb4 AtMsrb7 AtMsrb9 OsMsra4 OsMsrb3<br>PtMsra2.1 PtMsra2.2 PtMsra5 PtMsrb3.1 PtMsrb3.2   | 1 | AGL3, MADS Box protein                                                                                        |
| AtMsrb1 AtMsrb2 AtMsrb3 AtMsrb4 AtMsrb5 AtMsrb9 OsMsra2.1 OsMsra5<br>OsMsrb1 OsMsrb5 PtMsra5 PtMsrb1 PtMsrb3.1       | 1 | I-Box in rbcS genes and other light regulated genes                                                           |
| AtMsrb1 AtMsrb2 AtMsrb4 AtMsrb6 AtMsrb7 AtPMSR1 AtPMSR2 AtPMSR3<br>AtPMSR4 OsMsra2.1 OsMsrb1 PtMsra4.1               | 1 | Abscisic acid responsive elements-binding factor 2 (AREB-1)                                                   |
| AtMsrb2 AtMsrb4 AtMsrb5 AtMsrb7 AtPMSR1 AtPMSR2 AtPMSR3 AtPMSR4<br>OsMsra2.2 OsMsra5 PtMsra4.2 PtMsra5               | 1 | R2R3-type myb-like transcription factor (I-type binding site)                                                 |
| AtMsrb2 AtMsrb4 AtMsrb7 AtMsrb8 AtMsrb9 AtPMSR1 AtPMSR2 AtPMSR3<br>OsMsra4 PtMsra2.2 PtMsra4.1 PtMsra4.2             | 1 | NAC domain containing protein 87                                                                              |
| AtMsrb4 AtMsrb5 AtMsrb6 AtPMSR1 AtPMSR2 AtPMSR4 OsMsra2.1<br>OsMsra2.2 OsMsra5 OsMsrb1 OsMsrb3 PtMsra5               | 1 | bZIP transcription factor implicated in ABA induced gene expression                                           |
| AtMsra5 AtMsrb5 AtMsrb7 AtMsrb8 AtMsrb9 AtPMSR1 AtPMSR2 OsMsra4<br>OsMsrb1 PtMsra4.1 PtMsra4.2 PtMsrb3.2             | 1 | AS1/AS2 repressor complex binding motif I                                                                     |



|                                                                                                           |   |                                                                                                                                                       |
|-----------------------------------------------------------------------------------------------------------|---|-------------------------------------------------------------------------------------------------------------------------------------------------------|
| AtMsrb1 AtMsrb2 AtPMSR1 AtPMSR2 OsMsra2.1 OsMsra2.2 OsMsra4 OsMsra5 OsMsrb1 OsMsrb3 OsMsrb5 PtMsra4.1     | 1 | WRINKLED 1                                                                                                                                            |
| AtMsrb2 AtMsrb3 AtMsrb5 AtMsrb9 AtPMSR1 AtPMSR3 OsMsra2.1 OsMsra4 OsMsra5 PtMsra4.2 PtMsra5 PtMsrb3.1     | 1 | Calmodulin binding WRKY transcription factor 11                                                                                                       |
| AtMsrb2 AtMsrb3 AtMsrb7 AtMsrb8 AtPMSR1 AtPMSR4 OsMsra5 OsMsrb1 OsMsrb5 PtMsra4.2 PtMsrb1 PtMsrb5         | 1 | Ethylene-responsive transcription factor SCHLAFMUTZE                                                                                                  |
| AtMsra5 AtMsrb1 AtMsrb6 AtMsrb7 AtPMSR1 OsMsra2.1 OsMsra5 PtMsra2.1 PtMsra2.2 PtMsra4.1 PtMsra4.2 PtMsrb1 | 1 | Homeobox protein 40                                                                                                                                   |
| AtMsra5 AtMsrb3 AtMsrb4 AtMsrb8 AtPMSR1 OsMsra2.1 OsMsra4 OsMsra5 OsMsrb3 PtMsra2.2 PtMsrb3.1 PtMsrb3.2   | 1 | Zinc-finger protein in alfalfa roots, regulates salt tolerance                                                                                        |
| AtMsra5 AtMsrb4 AtMsrb6 AtMsrb9 AtPMSR2 AtPMSR3 AtPMSR4 OsMsra4 OsMsrb5 PtMsra2.1 PtMsra4.1 PtMsrb3.1     | 1 | Ethylene-responsive transcription factor RAP2.1                                                                                                       |
| AtMsrb2 AtMsrb4 AtMsrb8 AtPMSR2 OsMsra2.1 OsMsra5 OsMsrb1 OsMsrb3 PtMsra2.1 PtMsra4.1 PtMsrb1 PtMsrb5     | 1 | P1BS, PHR1 binding sequences                                                                                                                          |
| AtMsra5 AtMsrb2 AtMsrb4 AtMsrb6 AtMsrb9 AtPMSR3 OsMsra2.1 OsMsrb5 PtMsra2.1 PtMsrb1 PtMsrb3.1 PtMsrb3.2   | 1 | Two-component response regulator ARR11                                                                                                                |
| AtMsra5 AtMsrb6 AtMsrb7 AtMsrb8 AtPMSR3 OsMsra4 OsMsrb5 PtMsra4.1 PtMsra5 PtMsrb3.1 PtMsrb3.2 PtMsrb5     | 1 | CXC domain containing TSO1-like protein 1 (TCX3)                                                                                                      |
| AtMsrb4 AtMsrb6 AtMsrb9 AtPMSR4 OsMsra2.1 OsMsra4 OsMsra5 OsMsrb3 PtMsra2.1 PtMsra4.1 PtMsra5 PtMsrb1     | 1 | Heat shock transcription factor C1                                                                                                                    |
| AtMsra5 AtMsrb4 AtMsrb5 AtMsrb7 AtMsrb9 OsMsra2.1 OsMsra4 OsMsrb1 OsMsrb5 PtMsra4.1 PtMsra5 PtMsrb5       | 1 | Arabidopsis NAC domain containing protein 92 (ATNAC6)                                                                                                 |
| AtMsra5 AtMsrb1 AtMsrb3 AtMsrb6 AtMsrb9 AtPMSR1 AtPMSR2 AtPMSR3 AtPMSR4 OsMsra2.1 PtMsrb5                 | 1 | Homeobox-leucine zipper protein ATHB-7                                                                                                                |
| AtMsrb9 AtPMSR1 AtPMSR2 OsMsra2.1 OsMsra2.2 OsMsra4 OsMsra5 OsMsrb1 PtMsra5 PtMsrb1 PtMsrb3.1             | 1 | Arabidopsis thaliana signal-responsive gene1, Ca <sup>2+</sup> / calmodulin binding protein homolog to NtER1 (tobacco early ethylene-responsive gene) |
| AtMsrb2 AtMsrb5 AtMsrb7 AtMsrb8 AtMsrb9 AtPMSR1 AtPMSR3 AtPMSR4 OsMsrb5 PtMsra2.2 PtMsra4.1               | 1 | NAC secondary wall thickening promoting factor 2                                                                                                      |
| AtMsrb5 AtPMSR1 AtPMSR3 AtPMSR4 OsMsra2.1 OsMsra2.2 OsMsra4 OsMsrb1 OsMsrb3 OsMsrb5 PtMsrb5               | 1 | bZIP transcription factor binding to OCS-elements                                                                                                     |
| AtMsrb1 AtMsrb2 AtMsrb4 AtMsrb7 AtMsrb9 AtPMSR1 AtPMSR3 OsMsra4 OsMsrb1 PtMsrb3.2 PtMsrb5                 | 1 | Salt tolerance zinc finger (ZAT10)                                                                                                                    |
| AtMsrb2 AtMsrb3 AtMsrb7 AtMsrb8 AtPMSR1 AtPMSR4 OsMsra2.1 PtMsra4.1 PtMsrb3.1 PtMsrb3.2 PtMsrb5           | 1 | Wheat bZIP transcription factor HBP1B (histone gene binding protein 1b)                                                                               |
| AtMsrb3 AtMsrb5 AtMsrb7 AtPMSR1 AtPMSR4 OsMsra2.2 OsMsrb1 OsMsrb3 PtMsra2.1 PtMsra5 PtMsrb5               | 1 | Root hair-specific element with a 2-nucleotid spacer between left part (LP) and right part (RP)                                                       |
| AtMsrb3 AtMsrb6 AtMsrb7 AtMsrb8 AtMsrb9 AtPMSR2 AtPMSR3 OsMsra5 PtMsra2.1 PtMsrb1 PtMsrb5                 | 1 | Heat shock transcription factor B2A                                                                                                                   |

|                                                                                                     |   |                                                                                                          |
|-----------------------------------------------------------------------------------------------------|---|----------------------------------------------------------------------------------------------------------|
| AtMsrA5 AtMsrB3 AtMsrB7 AtPMSR2 AtPMSR4 OsMsrB1 OsMsrB5 PtMsrA4.1 PtMsrA5 PtMsrB1 PtMsrB3.2         | 1 | Reproductive Meristem 1 (secondary DNA binding preference)                                               |
| AtMsrA5 AtMsrB2 AtMsrB5 AtMsrB7 AtPMSR2 OsMsrA2.2 OsMsrA4 OsMsrB3 PtMsrA2.1 PtMsrA4.2 PtMsrB1       | 1 | (GA) <sub>n</sub> /(CT) <sub>n</sub> binding proteins (GBP, soybean; BBR, barley)                        |
| AtMsrA5 AtMsrB5 AtMsrB9 AtPMSR2 OsMsrA2.1 OsMsrA4 OsMsrA5 OsMsrB1 OsMsrB3 OsMsrB5 PtMsrB5           | 1 | CAACTC regulatory elements, GA-inducible                                                                 |
| AtMsrB2 AtMsrB4 AtMsrB5 AtMsrB6 AtMsrB8 AtPMSR2 OsMsrA5 OsMsrB3 PtMsrA4.2 PtMsrB1 PtMsrB3.2         | 1 | NAC domain containing protein 16                                                                         |
| AtMsrB5 AtPMSR3 AtPMSR4 OsMsrA2.2 OsMsrA4 OsMsrA5 PtMsrA2.1 PtMsrA2.2 PtMsrA4.2 PtMsrB3.1 PtMsrB5   | 1 | SEF3, Soybean embryo factor 3                                                                            |
| AtMsrA5 AtMsrB4 AtMsrB5 AtMsrB6 AtMsrB8 AtMsrB9 AtPMSR3 OsMsrA2.2 OsMsrB5 PtMsrA4.1 PtMsrB3.1       | 1 | Myb domain protein 65                                                                                    |
| AtMsrB1 AtMsrB3 AtMsrB4 AtMsrB5 AtMsrB6 AtPMSR3 OsMsrA2.1 OsMsrA5 OsMsrB1 PtMsrA5 PtMsrB3.1         | 1 | LOB domain-containing protein 19                                                                         |
| AtMsrB5 AtMsrB7 AtMsrB8 AtMsrB9 AtPMSR3 OsMsrA4 OsMsrB5 PtMsrA2.2 PtMsrA4.2 PtMsrB3.1 PtMsrB3.2     | 1 | Homeobox protein 25                                                                                      |
| AtMsrB4 AtMsrB5 AtMsrB6 AtPMSR4 OsMsrA2.1 OsMsrA4 OsMsrA5 OsMsrB5 PtMsrA2.2 PtMsrB1 PtMsrB5         | 1 | Squamosa promoter binding protein-like 14                                                                |
| AtMsrA5 AtMsrB1 AtMsrB5 AtMsrB8 PtMsrA2.1 PtMsrA2.2 PtMsrA4.1 PtMsrA4.2 PtMsrA5 PtMsrB3.1 PtMsrB3.2 | 1 | ARID/BRIGHT DNA-binding domain-containing protein                                                        |
| AtMsrA5 AtMsrB2 AtMsrB6 AtMsrB7 OsMsrB5 PtMsrA2.1 PtMsrA4.1 PtMsrA4.2 PtMsrA5 PtMsrB3.1 PtMsrB3.2   | 1 | Dof zinc finger protein DOF3.4 (OBF binding protein 1)                                                   |
| AtMsrB1 AtMsrB2 AtMsrB5 AtMsrB9 OsMsrA2.1 OsMsrA5 OsMsrB3 OsMsrB5 PtMsrA2.1 PtMsrB3.1 PtMsrB3.2     | 1 | Myb domain protein 62 (BW62B)                                                                            |
| AtMsrB1 AtMsrB2 AtMsrB6 AtMsrB8 OsMsrA2.1 PtMsrA2.1 PtMsrA2.2 PtMsrA4.2 PtMsrB1 PtMsrB3.2 PtMsrB5   | 1 | ABA response elements                                                                                    |
| AtMsrB1 AtMsrB3 AtMsrB5 OsMsrA2.1 OsMsrA2.2 OsMsrA4 OsMsrA5 OsMsrB1 OsMsrB3 OsMsrB5 PtMsrB3.1       | 1 | Lateral organ boundaries                                                                                 |
| AtMsrB1 AtMsrB7 AtMsrB8 OsMsrA4 OsMsrA5 OsMsrB5 PtMsrA2.1 PtMsrA5 PtMsrB1 PtMsrB3.1 PtMsrB5         | 1 | Floral homeotic protein AGL15                                                                            |
| AtMsrB5 AtMsrB6 AtMsrB7 AtMsrB8 OsMsrB1 PtMsrA2.2 PtMsrA4.2 PtMsrA5 PtMsrB3.1 PtMsrB3.2 PtMsrB5     | 1 | Arabidopsis thaliana homeo box protein 1                                                                 |
| AtMsrA5 AtMsrB2 AtMsrB8 AtPMSR1 AtPMSR2 AtPMSR4 OsMsrA2.1 OsMsrB1 PtMsrA2.1 PtMsrB3.2               | 1 | Root hair-specific element with a 3-nucleotid spacer between left part (LP) and right part (RP)          |
| AtMsrB1 AtMsrB2 AtMsrB7 AtPMSR1 AtPMSR2 AtPMSR4 OsMsrB3 PtMsrA2.1 PtMsrA2.2 PtMsrA4.2               | 1 | Flowering locus C                                                                                        |
| AtMsrA5 AtMsrB5 AtMsrB6 AtPMSR1 AtPMSR2 OsMsrA5 PtMsrA2.2 PtMsrA4.1 PtMsrB1 PtMsrB3.1               | 1 | GCN4, conserved in cereal seed storage protein gene promoters, similar to yeast GCN4 and vertebrate AP-1 |

|                                                                                            |   |                                                                                                    |
|--------------------------------------------------------------------------------------------|---|----------------------------------------------------------------------------------------------------|
| AtMsrb6 AtPMSR1 AtPMSR2 OsMsra2.1 OsMsra2.2 OsMsra4 OsMsra5<br>OsMsrb1 OsMsrb3 PtMsrb1     | 1 | Octamer motif found in plant histone H3 and H4 genes                                               |
| AtMsra5 AtMsrb1 AtMsrb2 AtMsrb4 AtMsrb6 AtMsrb7 AtPMSR1 AtPMSR3<br>OsMsra2.1 PtMsra2.2     | 1 | NAC domain containing protein 79 (AT5G07680)                                                       |
| AtMsrb1 AtMsrb2 AtMsrb3 AtMsrb5 AtMsrb7 AtMsrb8 AtPMSR1 AtPMSR3<br>OsMsrb5 PtMsra2.1       | 1 | Myb domain protein 56                                                                              |
| AtMsrb2 AtMsrb3 AtMsrb6 AtMsrb7 AtPMSR1 AtPMSR3 OsMsra5 PtMsra2.1<br>PtMsra5 PtMsrb3.2     | 1 | TEF cis acting elements in both RNA polymerase II-dependent promoters and<br>rDNA spacer sequences |
| AtMsrb2 AtMsrb7 AtMsrb9 AtPMSR1 AtPMSR3 OsMsra2.1 PtMsra4.1<br>PtMsra4.2 PtMsra5 PtMsrb3.2 | 1 | Myb domain protein 46                                                                              |
| AtMsra5 AtMsrb2 AtMsrb5 AtMsrb7 AtMsrb9 AtPMSR1 AtPMSR4 OsMsra5<br>PtMsra4.2 PtMsrb5       | 1 | SQUA promoter binding proteins                                                                     |
| AtMsrb1 AtMsrb2 AtMsrb4 AtMsrb5 AtPMSR1 AtPMSR4 OsMsrb1 OsMsrb3<br>PtMsra5 PtMsrb3.2       | 1 | Common plant regulatory factor (CPRF) from parsley                                                 |
| AtMsrb3 AtMsrb4 AtMsrb6 AtMsrb8 AtMsrb9 AtPMSR1 AtPMSR4 PtMsra4.1<br>PtMsrb1 PtMsrb3.2     | 1 | SEPALLATA3, transcription factor AGL9                                                              |
| AtMsra5 AtMsrb1 AtMsrb9 AtPMSR1 OsMsrb1 PtMsra4.1 PtMsra4.2 PtMsra5<br>PtMsrb3.1 PtMsrb3.2 | 1 | Target of early activation tagged (EAT) 2 (secondary DNA binding preference)                       |
| AtMsra5 AtMsrb2 AtMsrb3 AtMsrb4 AtMsrb5 AtPMSR1 OsMsra4 OsMsra5<br>PtMsra4.2 PtMsra5       | 1 | AGL2, Arabidopsis MADS-domain protein AGAMOUS-like 2                                               |
| AtMsra5 AtMsrb6 AtPMSR1 OsMsra2.1 OsMsra4 OsMsrb3 PtMsra2.1<br>PtMsra2.2 PtMsrb3.2 PtMsrb5 | 1 | Dof zinc finger protein DOF1.6 (AT1G47655)                                                         |
| AtMsrb9 AtPMSR1 OsMsra2.1 OsMsra2.2 OsMsra4 OsMsra5 OsMsrb1<br>PtMsra5 PtMsrb1 PtMsrb3.1   | 1 | Calmodulin-binding transcription activator 1 (AtSR2)                                               |
| AtMsra5 AtMsrb5 AtMsrb6 AtMsrb9 AtPMSR2 AtPMSR3 OsMsra2.1<br>OsMsra5 OsMsrb1 PtMsra4.2     | 1 | GATA transcription factor 19 (HANABA TARANU LIKE 2, HANL2)                                         |
| AtMsrb4 AtMsrb8 AtPMSR2 AtPMSR3 OsMsra4 OsMsra5 OsMsrb5 PtMsra2.2<br>PtMsrb3.2 PtMsrb5     | 1 | MYB protein from wheat                                                                             |
| AtMsrb3 AtMsrb6 AtMsrb7 AtMsrb8 AtPMSR2 AtPMSR4 OsMsra2.1<br>PtMsra2.1 PtMsra2.2 PtMsra4.2 | 1 | Myc recognition sequences                                                                          |
| AtMsrb5 AtPMSR2 AtPMSR4 OsMsra2.1 OsMsra2.2 OsMsra5 OsMsrb3<br>OsMsrb5 PtMsra4.1 PtMsra4.2 | 1 | Arabidopsis leucine zipper protein TGA1                                                            |
| AtMsra5 AtMsrb1 AtMsrb2 AtMsrb3 AtMsrb5 AtPMSR2 OsMsra2.2 OsMsra5<br>OsMsrb1 OsMsrb3       | 1 | Dehydration-responsive element-binding protein A-4                                                 |
| AtMsrb3 AtMsrb4 AtMsrb5 AtMsrb6 AtMsrb9 AtPMSR2 OsMsra5 OsMsrb5<br>PtMsra5 PtMsrb3.2       | 1 | Sunflower homeodomain leucine-zipper protein Hahb-4                                                |
| AtMsra5 AtMsrb3 AtMsrb4 AtMsrb6 AtPMSR3 AtPMSR4 OsMsra4 OsMsra5<br>OsMsrb3 PtMsrb3.2       | 1 | Squamosa promoter-binding-like protein 5                                                           |

|                                                                                                     |   |                                                                                                        |
|-----------------------------------------------------------------------------------------------------|---|--------------------------------------------------------------------------------------------------------|
| AtMsra5 AtMsraB5 AtMsraB7 AtMsraB8 AtPMSR3 AtPMSR4 OsMsraB3 OsMsraB5<br>PtMsraA5 PtMsraB3.1         | 1 | E2F class I sites                                                                                      |
| AtMsraA5 AtMsraB2 AtMsraB4 AtMsraB5 AtPMSR3 OsMsraA2.2 OsMsraA5 OsMsraB3<br>PtMsraA4.1 PtMsraB3.1   | 1 | Drosophila motif ten element                                                                           |
| AtMsraA5 AtMsraB3 AtMsraB5 AtPMSR3 OsMsraA2.2 OsMsraA5 OsMsraB1 OsMsraB3<br>OsMsraB5 PtMsraB3.1     | 1 | Trihelix-domain transcription factor VFP5 (AT5G05550)                                                  |
| AtMsraB1 AtMsraB3 AtMsraB5 AtPMSR3 OsMsraA2.1 OsMsraB1 OsMsraB5<br>PtMsraA4.2 PtMsraB3.1 PtMsraB3.2 | 1 | Agamous, required for normal flower development, similarity to SRF (human)<br>and MCM (yeast) proteins |
| AtMsraB1 AtMsraB4 AtMsraB5 AtMsraB6 AtPMSR3 OsMsraA2.1 OsMsraB1 OsMsraB5<br>PtMsraA2.2 PtMsraB1     | 1 | Trihelix transcription factor GTL2                                                                     |
| AtMsraA5 AtMsraB5 AtPMSR4 OsMsraA2.1 OsMsraA5 OsMsraB1 OsMsraB5<br>PtMsraA4.2 PtMsraA5 PtMsraB3.2   | 1 | MybSt1 (Myb Solanum tuberosum 1) with a single myb repeat                                              |
| AtMsraB2 AtMsraB4 AtMsraB5 AtMsraB6 AtMsraB7 AtMsraB9 OsMsraA2.2 PtMsraA5<br>PtMsraB1 PtMsraB5      | 1 | Phytochrome interacting factor 4                                                                       |
| AtMsraB1 AtMsraB4 AtMsraB5 AtPMSR1 AtPMSR4 OsMsraA5 OsMsraB1 OsMsraB3<br>PtMsraA5                   | 1 | BBES1/BZR1-like protein 3 (AT4G18890)                                                                  |
| AtMsraB2 AtMsraB4 AtMsraB6 AtMsraB9 AtPMSR1 AtPMSR4 OsMsraA5 PtMsraB1<br>PtMsraB5                   | 1 | Mycorrhiza transcription factor                                                                        |
| AtMsraB4 AtMsraB7 AtPMSR1 AtPMSR4 OsMsraA2.2 OsMsraA4 OsMsraB1<br>OsMsraB5 PtMsraB5                 | 1 | Squamosa promoter-binding-like protein 1                                                               |
| AtMsraB2 AtMsraB6 AtMsraB7 AtMsraB8 AtPMSR1 OsMsraA2.1 OsMsraA4 OsMsraB3<br>PtMsraA2.1              | 1 | WRKY DNA-binding protein 45                                                                            |
| AtMsraB5 AtMsraB8 AtMsraB9 AtPMSR1 OsMsraA4 OsMsraA5 PtMsraA2.1<br>PtMsraA4.2 PtMsraB5              | 1 | Homeobox protein 33                                                                                    |
| AtMsraB5 AtMsraB9 AtPMSR1 OsMsraA2.1 OsMsraA4 OsMsraB1 OsMsraB3 PtMsraB1<br>PtMsraB3.1              | 1 | Anther-specific myb gene from tobacco                                                                  |
| AtMsraB5 AtPMSR2 AtPMSR3 AtPMSR4 OsMsraA2.1 OsMsraB3 OsMsraB5<br>PtMsraA4.1 PtMsraA4.2              | 1 | Basic region / leucine zipper motif 60                                                                 |
| AtMsraA5 AtMsraB2 AtMsraB3 AtMsraB4 AtPMSR2 AtPMSR3 OsMsraA4 OsMsraA5<br>OsMsraB3                   | 1 | Heat stress transcription factor A-6b                                                                  |
| AtMsraB2 AtMsraB5 AtMsraB6 AtMsraB7 AtPMSR2 AtPMSR3 OsMsraA4 PtMsraA2.1<br>PtMsraB1                 | 1 | KANADI 4 (Aberrant Testa Shape) (secondary DNA binding preference)                                     |
| AtMsraB1 AtMsraB2 AtPMSR2 AtPMSR4 OsMsraA2.2 OsMsraA5 OsMsraB1<br>OsMsraB3 PtMsraB3.1               | 1 | Callose Defective Microspore 1 (zinc finger CCCH domain-containing protein<br>15)                      |
| AtMsraB3 AtMsraB5 AtMsraB7 AtPMSR2 AtPMSR4 PtMsraA2.2 PtMsraA4.2<br>PtMsraB3.2 PtMsraB5             | 1 | Myb family transcription factor REVEILLE 1                                                             |
| AtMsraB6 AtMsraB7 AtMsraB8 AtPMSR2 AtPMSR4 OsMsraA2.1 OsMsraA5 OsMsraB3<br>PtMsraB1                 | 1 | Oryza sativa bZIP protein 8                                                                            |

|                                                                                        |   |                                                                                    |
|----------------------------------------------------------------------------------------|---|------------------------------------------------------------------------------------|
| AtMsrb1 AtMsrb2 AtMsrb3 AtMsrb4 AtPMSR2 OsMsra2.1 OsMsra5<br>PtMsra2.2 PtMsrb5         | 1 | Basic leucine-zipper 52                                                            |
| AtMsrb1 AtMsrb4 AtMsrb5 AtPMSR2 OsMsra5 OsMsrb1 PtMsra2.2 PtMsra5<br>PtMsrb3.2         | 1 | Maize activator P of flavonoid biosynthetic genes                                  |
| AtMsra5 AtMsrb5 AtMsrb6 AtMsrb9 AtPMSR3 PtMsra4.1 PtMsra5 PtMsrb3.1<br>PtMsrb5         | 1 | Late Meristem Identity 1 (AtHB51, LMI1)                                            |
| AtMsrb1 AtMsrb6 AtMsrb9 AtPMSR3 OsMsra5 PtMsra4.2 PtMsra5 PtMsrb3.1<br>PtMsrb5         | 1 | Reproductive Meristem 1                                                            |
| AtMsrb1 AtPMSR3 OsMsra4 PtMsra2.1 PtMsra2.2 PtMsra4.1 PtMsra5<br>PtMsrb3.1 PtMsrb3.2   | 1 | High mobility group I/Y-like protein isolated from pea                             |
| AtMsrb4 AtMsrb5 AtMsrb9 AtPMSR3 OsMsra2.2 OsMsra4 OsMsra5 OsMsrb3<br>PtMsrb5           | 1 | ABORTED MICROSPORES                                                                |
| AtMsrb5 AtMsrb9 AtPMSR3 OsMsra5 OsMsrb5 PtMsra4.1 PtMsra4.2<br>PtMsra5 PtMsrb3.1       | 1 | Myb domain protein 121                                                             |
| AtMsra5 AtMsrb1 AtMsrb5 AtPMSR4 OsMsra2.1 OsMsra2.2 OsMsrb1<br>PtMsra2.1 PtMsra4.2     | 1 | Ethylene-responsive transcription factor RAP2-6 (secondary DNA binding preference) |
| AtMsrb1 AtMsrb2 AtMsrb9 AtPMSR4 OsMsra2.2 OsMsra4 OsMsra5 OsMsrb3<br>PtMsrb1           | 1 | Coupling element 3 (CE3), non-ACGT ABRE                                            |
| AtMsra5 AtMsrb1 AtMsrb2 OsMsra4 OsMsra5 OsMsrb1 OsMsrb3 OsMsrb5<br>PtMsrb5             | 1 | M-phase-specific activators (NtmybA1, NtmybA2, NtmybB)                             |
| AtMsra5 AtMsrb8 AtMsrb9 OsMsra4 OsMsrb3 PtMsra2.1 PtMsra4.1 PtMsrb1<br>PtMsrb3.1       | 1 | Myb family transcription factor AT1G74840                                          |
| AtMsra5 OsMsra2.1 OsMsra2.2 OsMsra5 PtMsra2.2 PtMsra4.1 PtMsra4.2<br>PtMsrb3.1 PtMsrb5 | 1 | Sugar and ABA responsive element conserved in several rbcS promoters               |
| AtMsrb1 AtMsrb2 AtMsrb5 OsMsrb1 PtMsra2.2 PtMsra4.1 PtMsra4.2<br>PtMsra5 PtMsrb5       | 1 | HDZip class I protein ATHB5                                                        |
| AtMsrb4 OsMsra2.1 OsMsra2.2 OsMsra4 OsMsra5 PtMsra2.2 PtMsra4.1<br>PtMsra4.2 PtMsrb3.2 | 1 | Member of the EPF family of zinc finger transcription factors                      |
| AtMsrb6 OsMsra2.1 OsMsra2.2 OsMsra5 OsMsrb1 PtMsra2.2 PtMsra4.2<br>PtMsrb1 PtMsrb5     | 1 | ERSE I (ER stress-response element I)-like motif                                   |
| AtMsrb9 AtPMSR1 AtPMSR2 AtPMSR4 OsMsra5 OsMsrb5 PtMsra4.1 PtMsrb5                      | 1 | SHI related sequence 1 (STYLISH 1) (secondary DNA binding preference)              |
| AtMsrb7 AtPMSR1 AtPMSR2 OsMsra2.2 OsMsra4 OsMsra5 OsMsrb5<br>PtMsra2.2                 | 1 | FAR-RED ELONGATED HYPOCOTYLS 3 and FAR-RED IMPAIRED RESPONSE 1                     |
| AtMsrb3 AtPMSR1 AtPMSR3 OsMsra2.2 OsMsrb5 PtMsra4.2 PtMsrb3.2<br>PtMsrb5               | 1 | Myb domain protein 67 (ATY53)                                                      |
| AtMsra5 AtMsrb5 AtMsrb9 AtPMSR1 AtPMSR4 OsMsrb1 PtMsra4.1 PtMsrb1                      | 1 | Myb domain protein R1 (ATMYB44)                                                    |
| AtMsrb5 AtPMSR1 OsMsra2.1 OsMsra2.2 OsMsra5 OsMsrb5 PtMsra2.1<br>PtMsra2.2             | 1 | C-repeat/dehydration response element                                              |

|                                                                                 |   |                                                                                                   |
|---------------------------------------------------------------------------------|---|---------------------------------------------------------------------------------------------------|
| AtMsra5 AtMsraB4 AtMsraB6 AtPMSR2 AtPMSR3 OsMsraB1 OsMsraB5 PtMsraA2.1          | 1 | Two-component response regulator ARR14                                                            |
| AtMsra5 AtMsraB5 AtPMSR2 AtPMSR3 OsMsraA4 OsMsraA5 PtMsraA5 PtMsraB3.1          | 1 | Asymmetric leaves2-like 18 (LOB domain-containing protein 16)                                     |
| AtMsraB1 AtMsraB5 AtPMSR2 AtPMSR3 OsMsraA5 OsMsraB3 PtMsraA2.1 PtMsraB1         | 1 | Plant specific floral meristem identity gene LEAFY (LFY)                                          |
| AtMsraB6 AtMsraB9 AtPMSR2 AtPMSR3 OsMsraA2.1 PtMsraA2.1 PtMsraA5 PtMsraB5       | 1 | Putative cis-acting element in various PAL and 4CL gene promoters                                 |
| AtMsraB3 AtPMSR2 AtPMSR4 OsMsraB5 PtMsraA2.1 PtMsraA5 PtMsraB1 PtMsraB5         | 1 | Hordeum vulgare Myb-related CAB-promoter-binding protein 1                                        |
| AtMsraA5 AtMsraB3 AtPMSR2 OsMsraA5 PtMsraA2.1 PtMsraA5 PtMsraB3.1 PtMsraB3.2    | 1 | HD-ZIP class III protein ATHB9                                                                    |
| AtMsraB1 AtMsraB4 AtMsraB8 AtPMSR2 OsMsraA4 PtMsraA5 PtMsraB3.2 PtMsraB5        | 1 | Myb-domain transcription factor werewolf                                                          |
| AtMsraB4 AtMsraB8 AtPMSR2 OsMsraA4 OsMsraA5 PtMsraA2.1 PtMsraA2.2 PtMsraB1      | 1 | Myb domain protein 31 (AtMYB31)                                                                   |
| AtMsraA5 AtMsraB2 AtMsraB4 AtPMSR3 AtPMSR4 PtMsraA4.1 PtMsraB3.2 PtMsraB5       | 1 | AGL1, Arabidopsis MADS-domain protein AGAMOUS-like 1                                              |
| AtMsraA5 AtMsraB9 AtPMSR3 AtPMSR4 OsMsraA2.2 OsMsraA4 PtMsraA4.2 PtMsraB1       | 1 | VirE2-interacting protein 1                                                                       |
| AtMsraA5 AtMsraB1 AtMsraB3 AtMsraB5 AtPMSR3 OsMsraA2.1 PtMsraA2.2 PtMsraA4.1    | 1 | NAC domain containing protein 38                                                                  |
| AtMsraA5 AtMsraB3 AtMsraB5 AtPMSR3 OsMsraA2.1 PtMsraA4.1 PtMsraA5 PtMsraB3.1    | 1 | Homeobox-leucine zipper protein ATHB-53                                                           |
| AtMsraA5 AtMsraB3 AtPMSR3 OsMsraA4 OsMsraA5 PtMsraB1 PtMsraB3.2 PtMsraB5        | 1 | Heat shock transcription factor C1 (secondary DNA binding preference)                             |
| AtMsraB7 AtPMSR4 OsMsraA2.1 OsMsraA2.2 OsMsraA5 OsMsraB3 PtMsraA5 PtMsraB5      | 1 | bZIP transcription factor from Antirrhinum majus                                                  |
| AtMsraA5 AtMsraB1 AtMsraB2 AtMsraB4 AtMsraB8 OsMsraA2.1 OsMsraA4 OsMsraB1       | 1 | WRKY DNA-binding protein 20                                                                       |
| AtMsraA5 AtMsraB2 AtMsraB5 AtMsraB6 PtMsraA2.1 PtMsraA4.2 PtMsraB1 PtMsraB3.1   | 1 | Ribosomal protein box, appears unique to plant RP genes and genes associated with gene expression |
| AtMsraA5 AtMsraB4 AtMsraB6 AtMsraB7 OsMsraA4 OsMsraA5 PtMsraB1 PtMsraB3.1       | 1 | Myb domain protein 33                                                                             |
| AtMsraB1 AtMsraB3 AtMsraB6 AtMsraB7 OsMsraB3 PtMsraA4.1 PtMsraA4.2 PtMsraA5     | 1 | Transcription factor NAC2                                                                         |
| AtMsraB1 AtMsraB4 AtMsraB6 OsMsraA2.1 OsMsraA2.2 OsMsraB1 OsMsraB3 PtMsraA5     | 1 | Brassinosteroid insensitive 1-EMS suppressor 1                                                    |
| AtMsraB1 AtMsraB4 AtMsraB9 OsMsraA4 OsMsraA5 PtMsraB1 PtMsraB3.1 PtMsraB3.2     | 1 | Rice MYB proteins with single DNA binding domains, binding to the amylase element (TATCCA)        |
| AtMsraB2 AtMsraB3 AtMsraB9 OsMsraA2.1 OsMsraA4 PtMsraA2.1 PtMsraA2.2 PtMsraA4.2 | 1 | Myb domain protein 59                                                                             |
| AtMsraB2 OsMsraA2.1 OsMsraA2.2 OsMsraA4 OsMsraA5 OsMsraB1 OsMsraB5 PtMsraB1     | 1 | ABA (abscisic acid) inducible transcriptional activator                                           |
| AtMsraB3 AtMsraB4 AtMsraB5 AtMsraB7 OsMsraA2.1 OsMsraB1 OsMsraB3 PtMsraA4.1     | 1 | Two-component response regulator ARR14 (secondary DNA binding preference)                         |
| AtMsraB3 AtMsraB6 AtMsraB8 PtMsraA2.1 PtMsraB1 PtMsraB3.1 PtMsraB3.2 PtMsraB5   | 1 | Myb domain protein 93                                                                             |

|                                                                 |   |                                                                                            |
|-----------------------------------------------------------------|---|--------------------------------------------------------------------------------------------|
| AtMsrb3 AtMsrb7 AtPMSR1 AtPMSR3 AtPMSR4 PtMsra2.1 PtMsra4.1     | 1 | Myb family transcription factor At5g56840                                                  |
| AtMsrb2 AtMsrb7 AtPMSR1 AtPMSR3 PtMsra2.1 PtMsra4.1 PtMsrb3.1   | 1 | High Cambial Activity 2 (AT5G62940, DOF5.6)                                                |
| AtMsrb4 AtMsrb7 AtMsrb9 AtPMSR1 AtPMSR3 OsMsra4 OsMsrb3         | 1 | NAC domain containing protein 58                                                           |
| AtMsrb4 AtPMSR1 AtPMSR3 OsMsra4 OsMsra5 PtMsrb3.1 PtMsrb5       | 1 | Arabidopsis Telo-box interacting protein related to the conserved animal protein Pur-alpha |
| AtMsrb9 AtPMSR1 OsMsra2.2 OsMsra4 OsMsra5 OsMsrb3 PtMsrb1       | 1 | Oriza sativa leaf and tiller angle increased controller                                    |
| AtMsrb1 AtMsrb9 AtPMSR2 AtPMSR4 OsMsra2.1 OsMsra5 OsMsrb3       | 1 | bZIP factors DPBF-1 and 2 (Dc3 promoter binding factor-1 and 2)                            |
| AtMsrb1 AtMsrb2 AtMsrb5 AtMsrb9 AtPMSR2 OsMsrb5 PtMsra2.1       | 1 | MADS-box protein GORDITA (AGL63)                                                           |
| AtMsrb1 AtMsrb2 AtPMSR3 AtPMSR4 PtMsra5 PtMsrb3.1 PtMsrb3.2     | 1 | TCP class I transcription factor (Arabidopsis)                                             |
| AtMsra5 AtPMSR3 OsMsra2.2 OsMsra5 OsMsrb1 OsMsrb3 PtMsrb1       | 1 | Myb domain protein 88                                                                      |
| AtMsrb1 AtPMSR3 OsMsra2.2 OsMsrb1 OsMsrb5 PtMsra4.2 PtMsrb1     | 1 | Target of early activation tagged 1 (RAP2.7)                                               |
| AtMsrb7 AtMsrb8 AtMsrb9 AtPMSR3 OsMsra2.1 PtMsra2.1 PtMsra5     | 1 | Early-phytochrome-responsive 1 (REVEILLE 7)                                                |
| AtMsra5 AtMsrb4 AtMsrb7 AtPMSR4 OsMsra2.1 OsMsra5 OsMsrb3       | 1 | GATA transcription factor 4                                                                |
| AtMsra5 AtMsrb5 OsMsra2.1 OsMsra2.2 OsMsra4 OsMsra5 OsMsrb1     | 1 | Promoter elements involved in MgProto (Mg-protoporphyrin IX) and light-mediated induction  |
| AtMsra5 AtMsrb9 OsMsra2.1 PtMsra2.1 PtMsra4.2 PtMsrb1 PtMsrb5   | 1 | Arabidopsis thaliana class A heat shock factor 1a                                          |
| AtMsrb3 AtMsrb4 AtMsrb6 AtMsrb9 PtMsra2.2 PtMsrb1 PtMsrb5       | 1 | ULT1 interacting factor 1 (AT4G37180)                                                      |
| AtMsrb5 OsMsra2.1 OsMsra2.2 OsMsra4 OsMsra5 OsMsrb1 OsMsrb3     | 1 | Mitochondrial transcription termination factor family protein (mTERF)                      |
| OsMsra2.1 OsMsra2.2 OsMsra4 PtMsra4.2 PtMsra5 PtMsrb3.2 PtMsrb5 | 1 | Anaerobic basic leucine zipper                                                             |
| OsMsra2.1 OsMsra2.2 OsMsra4 OsMsra5 OsMsrb1 OsMsrb3 PtMsrb1     | 1 | H. vulgare dehydration-response factor 1                                                   |
| OsMsra2.1 OsMsra2.2 OsMsra4 OsMsra5 OsMsrb3 OsMsrb5 PtMsrb1     | 1 | ABA insensitive protein 4 (ABI4)                                                           |
| AtPMSR1 AtPMSR2 OsMsra5 OsMsrb1 PtMsra2.1 PtMsra4.2             | 1 | AC-type motifs, MYB46/MYB83-responsive elements                                            |
| AtMsra5 AtMsrb6 AtPMSR1 OsMsrb5 PtMsrb1 PtMsrb5                 | 1 | Iron-deficiency-responsive element 1 (IDEF1)                                               |
| AtMsrb2 AtPMSR2 AtPMSR3 OsMsrb1 PtMsra5 PtMsrb3.1               | 1 | DREB and EAR motif protein 3                                                               |
| AtMsrb7 AtMsrb8 AtPMSR2 AtPMSR3 OsMsra2.1 OsMsrb1               | 1 | Flowering bHLH 3                                                                           |
| AtMsra5 AtMsrb3 AtMsrb7 AtPMSR2 OsMsrb5 PtMsra4.1               | 1 | Tomato MADS-box transcription factor MADS-RIN                                              |
| AtMsra5 AtMsrb4 AtMsrb6 AtPMSR2 OsMsrb1 PtMsra2.1               | 1 | Tobacco bHLH transcription factor MYC2                                                     |
| AtMsra5 AtMsrb5 AtMsrb9 AtPMSR2 PtMsrb3.2 PtMsrb5               | 1 | Upstream sequence elements in the promoters of U-snRNA genes of higher plants              |
| AtMsrb1 AtMsrb2 AtPMSR2 OsMsra4 PtMsra5 PtMsrb3.1               | 1 | Cis-acting element conserved in various PAL and 4CL promoters                              |
| AtMsrb1 AtMsrb5 AtPMSR2 OsMsra5 OsMsrb3 PtMsrb5                 | 1 | GATA transcription factor 11                                                               |
| AtMsrb4 AtMsrb7 AtPMSR2 OsMsra2.1 PtMsra2.1 PtMsra5             | 1 | Elicitor response element                                                                  |
| AtPMSR2 OsMsra2.1 OsMsra2.2 OsMsra4 PtMsra4.1 PtMsrb1           | 1 | Far-red elongated hypocotyls 3 protein                                                     |
| AtMsrb5 AtPMSR3 AtPMSR4 OsMsra5 PtMsra4.1 PtMsrb3.1             | 1 | Myb domain protein 101 (ATM1)                                                              |
| AtMsra5 AtMsrb1 AtMsrb9 AtPMSR3 OsMsra5 OsMsrb3                 | 1 | ETTIN (secondary DNA binding preference)                                                   |
| AtMsra5 AtPMSR3 OsMsra2.2 OsMsra4 OsMsrb1 OsMsrb3               | 1 | GCC-box, ethylene-responsive element (ERE)                                                 |
| AtPMSR3 OsMsra2.2 OsMsra5 OsMsrb3 OsMsrb5 PtMsra2.1             | 1 | Dwarf and Delayed Flowering 1                                                              |

|                                                     |   |                                                                                               |
|-----------------------------------------------------|---|-----------------------------------------------------------------------------------------------|
| AtMsrB1 AtMsrB2 AtMsrB9 AtPMSR4 PtMsrA5 PtMsrB1     | 1 | Phytochrome B-regulated transcription factor PIF3 (nuclear-localized bHLH-protein)            |
| AtMsrB1 AtMsrB2 AtPMSR4 PtMsrA5 PtMsrB3.1 PtMsrB3.2 | 1 | Promoter motif enriched in a cluster of Arabidopsis genes co-expressed during immune response |
| AtMsrB3 AtMsrB9 AtPMSR4 OsMsrA4 OsMsrB3 PtMsrB3.1   | 1 | DIVARICATA 6 (myb/SANT-like DNA-binding domain-containing protein AT5G05790)                  |
| AtMsrA5 AtMsrB2 AtMsrB3 AtMsrB7 AtMsrB8 PtMsrB3.1   | 1 | Myb domain protein 3R-5                                                                       |
| AtMsrA5 AtMsrB2 AtMsrB3 OsMsrA4 OsMsrB1 PtMsrA2.1   | 1 | SHI related sequence 1 (STYLISH 1)                                                            |
| AtMsrB2 AtMsrB5 AtMsrB7 OsMsrA2.2 OsMsrA4 PtMsrA2.1 | 1 | FAR1-related sequence 9                                                                       |
| OsMsrA2.1 OsMsrA2.2 OsMsrA4 OsMsrA5 OsMsrB3 OsMsrB5 | 1 | LOB domain-containing protein 13                                                              |
| AtMsrB7 AtPMSR1 AtPMSR2 AtPMSR3 PtMsrA4.2           | 1 | NAC domain containing protein 92 (NAC6)                                                       |
| AtMsrB6 AtMsrB7 AtPMSR1 AtPMSR2 PtMsrB3.1           | 1 | Myb-like HTH transcriptional regulator-like protein (G2-like family protein)                  |
| AtPMSR1 AtPMSR2 OsMsrA4 OsMsrA5 PtMsrA4.1           | 1 | Putative cis-acting element on various PAL and 4CL gene promoters                             |
| AtPMSR1 AtPMSR3 AtPMSR4 OsMsrB1 PtMsrB3.2           | 1 | Myb/SANT-like DNA-binding domain-containing protein MYBS1                                     |
| AtMsrB4 AtMsrB5 AtMsrB7 AtPMSR1 AtPMSR4             | 1 | Dwarf and Delayed Flowering 2                                                                 |
| AtMsrB1 AtMsrB3 AtMsrB8 AtPMSR1 PtMsrA4.1           | 1 | Short Vegetative Phase                                                                        |
| AtMsrB4 AtPMSR1 OsMsrA2.2 OsMsrA4 OsMsrA5           | 1 | Squamosa promoter-binding-like protein 1 (secondary DNA binding preference)                   |
| AtMsrB5 AtMsrB7 AtPMSR1 OsMsrA2.2 PtMsrA2.1         | 1 | Basic Pentacysteine 1                                                                         |
| AtMsrB2 AtMsrB6 AtPMSR2 PtMsrA4.2 PtMsrB3.2         | 1 | Myb family transcription factor AT1G19000                                                     |
| AtMsrB4 AtMsrB8 AtPMSR2 OsMsrA2.1 OsMsrB5           | 1 | WRKY transcription factor 7                                                                   |
| AtMsrB5 AtMsrB7 AtMsrB8 AtPMSR2 OsMsrA2.2           | 1 | bZIP transcription factor Elongated Hypocotyl 5                                               |
| AtMsrB6 AtMsrB8 AtPMSR2 OsMsrA4 OsMsrB5             | 1 | Floral homeotic protein APETALA1                                                              |
| AtPMSR2 OsMsrA4 OsMsrB1 PtMsrA2.2 PtMsrB3.1         | 1 | DOF Affecting Germination 2                                                                   |
| AtMsrB5 AtMsrB9 AtPMSR3 AtPMSR4 PtMsrA4.2           | 1 | Auxin Response Element                                                                        |
| AtPMSR3 OsMsrA2.1 OsMsrA2.2 OsMsrA5 OsMsrB5         | 1 | Myb related transcriptional activator, direct ortholog of S.pombe CDC5 protein                |
| AtMsrA5 AtMsrB4 AtMsrB6 PtMsrA5 PtMsrB3.1           | 1 | Zinc finger CCCH domain-containing protein 67 (AT5G63260)                                     |
| AtMsrA5 AtMsrB8 OsMsrA2.1 OsMsrB1 PtMsrB1           | 1 | TCP domain protein 16                                                                         |
| AtMsrA5 OsMsrA2.2 OsMsrA4 PtMsrA4.1 PtMsrB1         | 1 | Myb domain protein 61                                                                         |
| AtMsrB1 AtMsrB2 AtMsrB6 AtMsrB7 PtMsrA5             | 1 | Trihelix transcription factor GT-2                                                            |
| AtMsrB1 AtMsrB3 AtMsrB6 PtMsrB1 PtMsrB5             | 1 | Homeobox-leucine zipper protein HAT2                                                          |
| AtMsrB1 AtMsrB3 OsMsrA2.2 OsMsrA5 PtMsrA2.2         | 1 | myb domain protein 58                                                                         |
| AtMsrB1 AtMsrB7 AtMsrB8 AtMsrB9 OsMsrB5             | 1 | OCS-like elements                                                                             |
| AtMsrB2 AtMsrB6 OsMsrA2.2 OsMsrA5 OsMsrB1           | 1 | Rice iron-related transcription factor 2                                                      |
| AtMsrB3 AtMsrB4 AtMsrB7 OsMsrA2.2 PtMsrB1           | 1 | Transcription factor DYSFUNCTIONAL TAPETUM 1                                                  |
| AtMsrB3 AtMsrB5 PtMsrA4.1 PtMsrA5 PtMsrB1           | 1 | Dof2 - single zinc finger transcription factor                                                |
| AtMsrB3 AtMsrB7 OsMsrA4 PtMsrA2.1 PtMsrA4.2         | 1 | Myb domain protein 27                                                                         |



|                                               |   |                                                                                                                  |
|-----------------------------------------------|---|------------------------------------------------------------------------------------------------------------------|
| AtMsrb3 OsMsra5 PtMsra4.1 PtMsra4.2 PtMsrb5   | 1 | Heat stress transcription factor B-2a (HSF6)                                                                     |
| AtMsrb4 AtMsrb6 OsMsra4 PtMsrb3.1 PtMsrb3.2   | 1 | Myb family transcription factor At5g61620                                                                        |
| AtMsrb5 AtMsrb6 AtMsrb9 OsMsra4 PtMsrb1       | 1 | Myb hypocotyl elongation-related (AT5G47390, KUODA1)                                                             |
| AtMsrb6 AtMsrb7 PtMsra4.1 PtMsra4.2 PtMsrb3.2 | 1 | Suppressor of overexpression of CO 1 (AGL20)                                                                     |
| AtMsrb6 AtMsrb9 OsMsra2.1 OsMsra5 OsMsrb1     | 1 | Zinc finger and SCAN domain containing 4                                                                         |
| AtMsrb6 OsMsrb3 PtMsra4.2 PtMsrb3.1 PtMsrb3.2 | 1 | B-box domain protein 31                                                                                          |
| AtMsrb7 AtMsrb8 PtMsra2.1 PtMsra4.2 PtMsrb1   | 1 | Squamosa promoter-binding-like protein 13                                                                        |
| OsMsra2.1 OsMsra2.2 OsMsra4 OsMsra5 OsMsrb3   | 2 | Ethylene-responsive transcription factor ERF057 (AT5G65130) Ethylene and salt inducible 3                        |
| OsMsra2.2 OsMsra4 OsMsra5 OsMsrb1 OsMsrb5     | 1 | Dehydration-responsive element-binding protein 2C                                                                |
| AtMsrb3 AtPMSR1 AtPMSR4 PtMsrb3.2             | 1 | Telomere repeat-binding protein 1                                                                                |
| AtMsrb3 AtPMSR1 OsMsra5 OsMsrb1               | 1 | Ethylene-responsive elements (ERE) and jasmonate- and elicitor-responsive elements (JERE)                        |
| AtMsrb4 AtMsrb5 AtPMSR1 PtMsra5               | 1 | Transcription factor Big Petal (AT1G59640)                                                                       |
| AtMsrb9 AtPMSR2 AtPMSR3 PtMsra5               | 1 | Myb domain protein 96                                                                                            |
| AtMsrb1 AtPMSR2 OsMsrb3 OsMsrb5               | 1 | Arabidopsis NAC domain containing protein 92 (ATNAC2/ATNAC6)                                                     |
| AtMsrb3 AtMsrb9 AtPMSR2 PtMsra2.2             | 1 | WRKY transcription factor 70                                                                                     |
| AtMsrb4 AtMsrb9 AtPMSR2 PtMsrb3.1             | 1 | R2R3-MYB transcription factor AtMYB77                                                                            |
| AtMsrb5 AtPMSR2 OsMsrb5 PtMsrb1               | 1 | Transcription factor TGA4 (OBF4)                                                                                 |
| AtMsrb6 AtMsrb9 AtPMSR2 OsMsra4               | 1 | Brassinazole-resistant 1 protein                                                                                 |
| AtMsrb2 AtPMSR3 OsMsra2.1 PtMsra4.1           | 1 | Maize C1 myb-domain protein                                                                                      |
| AtMsrb9 AtPMSR3 PtMsra2.1 PtMsrb3.2           | 1 | WRKY transcription factor 22                                                                                     |
| AtMsrb2 AtPMSR4 OsMsra2.1 PtMsrb5             | 1 | DREB and EAR motif protein 4 (RAP2.10)                                                                           |
| AtPMSR4 OsMsra2.2 OsMsra5 OsMsrb1             | 1 | Tobacco bZip transcription activator (TAF-1)                                                                     |
| AtMsra5 OsMsra5 OsMsrb1 PtMsra2.1             | 1 | Ethylene-responsive transcription factor ERF043 (AT4G32800)                                                      |
| AtMsrb2 AtMsrb7 PtMsra5 PtMsrb1               | 1 | Dof zinc finger protein DOF4.2                                                                                   |
| AtMsrb2 PtMsrb3.1 PtMsrb3.2 PtMsrb5           | 1 | Homeobox-leucine zipper protein ATHB-20                                                                          |
| OsMsra4 OsMsrb1 OsMsrb3 PtMsra2.2             | 1 | Transcription factor TGA2 (secondary DNA binding preference)                                                     |
| OsMsra2.1 OsMsra2.2 OsMsra4 OsMsra5           | 1 | Ethylene-responsive transcription factor ERF017 (AT1G19210)                                                      |
| OsMsra2.2 OsMsra5 OsMsrb1 OsMsrb3             | 3 | Ethylene-responsive transcription factor 1A (AT4G17500) TCP class I transcription factor Human motif ten element |
| OsMsra2.2 OsMsra4 OsMsra5 OsMsrb3             | 2 | Dehydration-responsive element-binding protein 2G (AT5G18450) FAR-RED Impaired Response 1                        |
| OsMsra2.2 OsMsra4 OsMsrb1 OsMsrb3             | 1 | Ethylene-responsive transcription factor 1B (AT3G23240)                                                          |
| OsMsra2.2 OsMsra4 OsMsrb3 OsMsrb5             | 1 | Ethylene-responsive transcription factor RAP2-6                                                                  |
| AtMsrb3 AtPMSR1 OsMsrb5                       | 1 | Ethylene-responsive transcription factor ERF055 (AT1G36060)                                                      |
| AtPMSR1 OsMsrb5 PtMsra5                       | 1 | Dehydration response element-binding protein 19                                                                  |

|                             |   |                                                                                                                              |
|-----------------------------|---|------------------------------------------------------------------------------------------------------------------------------|
| AtPMSR1 OsMsrB3 PtMsrB1     | 1 | DREB and EAR motif protein 4 (RAP2.10) (secondary DNA binding preference)                                                    |
| AtMsrA5 AtPMSR2 AtPMSR3     | 1 | NAC (No Apical Meristem) domain transcriptional regulator superfamily protein                                                |
| AtPMSR2 AtPMSR4 PtMsrA2.1   | 1 | Myb domain protein 74                                                                                                        |
| AtMsrB7 AtPMSR2 OsMsrA2.2   | 1 | Wheat NAC-domain DNA binding factor                                                                                          |
| AtMsrB6 AtPMSR3 OsMsrA4     | 1 | LHY/CCA1-like 1 (REVEILLE 4)                                                                                                 |
| AtPMSR3 PtMsrA2.1 PtMsrA5   | 1 | Sugar responsive elements                                                                                                    |
| AtPMSR3 OsMsrA4 PtMsrB3.1   | 1 | Dof zinc finger protein DOF5.4 (OBF binding protein 4)                                                                       |
| AtMsrB1 AtPMSR4 PtMsrA4.2   | 1 | NAC domain containing protein 17                                                                                             |
| AtMsrB6 AtPMSR4 PtMsrA4.1   | 1 | Transcription factor TCP22 (AT1G72010)                                                                                       |
| AtMsrA5 AtMsrB8 PtMsrA5     | 1 | Homeobox-leucine zipper protein ATHB-13                                                                                      |
| AtMsrA5 OsMsrB3 PtMsrA5     | 1 | Dof zinc finger protein DOF3.5 (AT3G52440)                                                                                   |
| AtMsrB1 AtMsrB2 PtMsrB5     | 1 | HRS1 Homolog 3 (AT1G25550)                                                                                                   |
| AtMsrB2 OsMsrA2.1 OsMsrA4   | 1 | Abscisic acid insensitive 5 (bZIP12, EEL)                                                                                    |
| AtMsrB3 OsMsrB1 OsMsrB3     | 1 | Myb domain protein 119                                                                                                       |
| AtMsrB3 OsMsrA5 PtMsrA2.1   | 1 | Homeobox-leucine zipper protein ATHB-21                                                                                      |
| AtMsrB3 PtMsrA2.2 PtMsrB1   | 1 | Homeobox-leucine zipper protein ATHB-18                                                                                      |
| AtMsrB3 OsMsrB1 PtMsrB3.2   | 1 | Silencing element binding factor - transcriptional repressor                                                                 |
| AtMsrB4 OsMsrA2.1 OsMsrB5   | 1 | Duplicated SANT DNA-binding domain-containing protein MYBS2                                                                  |
| AtMsrB5 OsMsrA2.2 OsMsrA4   | 1 | Ethylene-responsive transcription factor RAP2-3                                                                              |
| AtMsrB6 PtMsrA4.2 PtMsrB3.2 | 1 | Dof zinc finger protein DOF4.5                                                                                               |
| AtMsrB7 OsMsrA2.2 OsMsrA5   | 1 | Ethylene-responsive transcription factor ERF018                                                                              |
| AtMsrB9 OsMsrA5 PtMsrA4.1   | 1 | Heat stress transcription factor A-4a (HSF21)                                                                                |
| OsMsrA2.1 OsMsrA5 OsMsrB1   | 1 | Wheat NAC-domain DNA binding factor (DNA binding site I)                                                                     |
| OsMsrA2.1 OsMsrA5 OsMsrB3   | 1 | FYF Up-regulating 321 Factor 1 (AT1G71450)                                                                                   |
| OsMsrA2.2 OsMsrA5 OsMsrB1   | 1 | Ethylene-responsive transcription factor RAP2-11                                                                             |
| OsMsrA2.2 OsMsrA5 OsMsrB3   | 3 | Redox responsive transcription factor 1 Ethylene-responsive transcription factor 8 X gene core promoter element 1            |
| OsMsrA2.2 OsMsrB1 OsMsrB3   | 2 | Ethylene-responsive transcription factor RAP2-3 (secondary DNA binding preference) Target of early activation tagged (EAT) 2 |
| OsMsrA2.2 OsMsrA4 OsMsrA5   | 1 | Ethylene-responsive transcription factor 15 (AT2G31230)                                                                      |
| OsMsrA2.2 OsMsrA4 OsMsrB5   | 1 | Transcription factor TGA2                                                                                                    |
| OsMsrA5 OsMsrB1             | 1 | Phytochrome B-regulated transcription factor PIF3                                                                            |
| AtPMSR1 AtPMSR4             | 2 | NAM-like protein CUP-SHAPED COTYLEDON 1 BES1-interacting Myc-like protein 2                                                  |

|                     |   |                                                                                                                                                        |
|---------------------|---|--------------------------------------------------------------------------------------------------------------------------------------------------------|
| AtPMSR1 PtMsra2.2   | 1 | KNOTTED1 (KN1) and KNOTTED interacting protein (KIP) are TALE class homeodomain proteins. The KN1-KIP complex binds this DNA motif with high affinity. |
| AtMsrb8 AtPMSR2     | 1 | NAC domain containing protein 2                                                                                                                        |
| AtPMSR2 PtMsra4.1   | 1 | BES1-interacting Myc-like protein 1                                                                                                                    |
| AtPMSR2 PtMsra5     | 1 | WRKY DNA-binding protein 40                                                                                                                            |
| AtPMSR3 OsMsra5     | 1 | Ethylene-responsive transcription factor ERF112 (AT2G33710)                                                                                            |
| AtMsrb2 AtPMSR3     | 1 | HBP-1a, suggested to be involved in the cell cycle-dependent expression                                                                                |
| AtMsrb3 AtPMSR3     | 1 | CUP-SHAPED COTYLEDON 3                                                                                                                                 |
| AtPMSR4 OsMsra5     | 1 | TCP domain protein 7                                                                                                                                   |
| AtPMSR4 OsMsrb5     | 2 | LOB domain-containing protein 18 Initiator (INR) and downstream promoter element (DPE) with strictly maintained spacing                                |
| AtMsra5 AtPMSR4     | 1 | RNA polymerase III transcription initiation factor complex (TFIIIC)                                                                                    |
| AtMsrb2 AtPMSR4     | 1 | DNA-binding protein S1FA3                                                                                                                              |
| AtPMSR4 PtMsrb5     | 1 | bZIP transcription factor TGA1 (bZIP47)                                                                                                                |
| AtPMSR4 OsMsra2.1   | 1 | VIRE2-interacting protein 1                                                                                                                            |
| AtMsra5 OsMsrb3     | 1 | Ethylene-responsive transcription factor ERF039 (AT4G16750)                                                                                            |
| AtMsra5 AtMsrb2     | 1 | WRKY DNA-binding protein 18                                                                                                                            |
| AtMsra5 AtMsrb5     | 1 | ANT (Arabidopsis protein AINTEGUMENTA), member of the plant-specific family of AP2/EREBP-transcription factors                                         |
| AtMsra5 OsMsra2.1   | 1 | Mitochondrial dysfunction motif                                                                                                                        |
| AtMsrb1 OsMsra2.1   | 1 | Basic region/leucine zipper transcription factor 68                                                                                                    |
| AtMsrb2 OsMsrb1     | 1 | Vascular related NAC-domain protein 1                                                                                                                  |
| AtMsrb2 PtMsra4.1   | 1 | Basic leucine-zipper 28                                                                                                                                |
| AtMsrb3 OsMsrb1     | 1 | Homeodomain protein of the Knotted class1                                                                                                              |
| AtMsrb3 PtMsrb3.1   | 1 | Myb domain protein 55                                                                                                                                  |
| AtMsrb4 OsMsra5     | 1 | PHR1-like 1 (AT5G29000)                                                                                                                                |
| AtMsrb4 AtMsrb5     | 1 | BES1/BZR1 homolog 4 (AT1G78700)                                                                                                                        |
| AtMsrb4 AtMsrb9     | 1 | CUP-SHAPED COTYLEDON 2                                                                                                                                 |
| AtMsrb5 PtMsra2.1   | 1 | DIVARICATA 5 (VHA-B1-interacting transcription factor AT3G11280)                                                                                       |
| AtMsrb5 PtMsra5     | 1 | UPRE (unfolded protein response element) like motif                                                                                                    |
| AtMsrb6 PtMsra4.1   | 1 | TCP domain protein 2 (Teosinte branched 1)                                                                                                             |
| AtMsrb8 OsMsrb3     | 1 | WRKY DNA binding protein 12                                                                                                                            |
| AtMsrb9 PtMsrb3.2   | 1 | WRKY DNA binding protein 38                                                                                                                            |
| OsMsrb1 PtMsra2.2   | 1 | NAC domain containing protein 13                                                                                                                       |
| PtMsra4.1 PtMsra4.2 | 1 | Ethylene-responsive transcription factor ERF014 (AT1G44830)                                                                                            |
| OsMsra5 PtMsrb3.1   | 1 | Squamosa promoter-binding-like protein 14                                                                                                              |

|                     |   |                                                                                                                                                                                                                                                                                                    |
|---------------------|---|----------------------------------------------------------------------------------------------------------------------------------------------------------------------------------------------------------------------------------------------------------------------------------------------------|
| OsMsrA2.1 PtMsrB3.2 | 1 | CCHC-type zinc knuckle protein                                                                                                                                                                                                                                                                     |
| OsMsrA2.1 PtMsrB5   | 1 | TCP domain protein 24                                                                                                                                                                                                                                                                              |
| OsMsrA2.2 PtMsrB5   | 1 | Myb domain protein 55 (secondary DNA binding preference)                                                                                                                                                                                                                                           |
| OsMsrA2.2 OsMsrA5   | 4 | Cytokinin Response Factor 10 Transcription factor TCP23 Ethylene-responsive transcription factor ERF019 (AT1G22810) Ethylene-responsive transcription factor ERF018 (secondary DNA binding preference)                                                                                             |
| OsMsrA2.2 OsMsrB3   | 1 | Transcription factor II B (TFIIB) recognition element                                                                                                                                                                                                                                              |
| OsMsrA5             | 8 | Ethylene-responsive transcription factor 2 Rice bHLH protein Ethylene-responsive transcription factor 10 Nodulin consensus sequence 3 Ethylene-responsive transcription factor 115 C-repeat-binding factor 2 (DREB1B) Ethylene-responsive transcription factor 5 TCP domain protein 21 (AT5G08330) |
| OsMsrB1             | 4 | Dehydration-responsive element-binding protein 2C (secondary DNA binding preference) LIM domain protein binding to a PAL-box like sequence E2F transcription factor 3 BBES1/BZR1-like protein 2 (AT4G36780)                                                                                        |
| OsMsrB3             | 1 | Transcription factor TCP15 (AT1G69690)                                                                                                                                                                                                                                                             |
| OsMsrB5             | 1 | Heat stress transcription factor A-1b (HSF3)                                                                                                                                                                                                                                                       |
| AtPMSR1             | 1 | NAC domain containing protein 3 (ORE1 SISTER1)                                                                                                                                                                                                                                                     |
| AtPMSR3             | 3 | WRKY transcription factor 8 R2R3-type myb-like transcription factor (IIG-type binding site) Cooperatively regulated by ethylene and jasmonate 1 (DEAR1)                                                                                                                                            |
| AtPMSR4             | 2 | Myb domain protein 116 RY and Sph motifs conserved in seed-specific promoters                                                                                                                                                                                                                      |
| AtMsrA5             | 1 | Heat stress transcription factor C-1                                                                                                                                                                                                                                                               |
| AtMsrB1             | 1 | NAC domain containing protein 45                                                                                                                                                                                                                                                                   |
| AtMsrB2             | 4 | Transcription factor TGA3 Arabidopsis NAC domain containing protein 81; ATAF2 WRKY transcription factor 55 NTM1-LIKE 6 (NAC domain containing protein 62)                                                                                                                                          |
| AtMsrB6             | 1 | Indeterminate(ID)-domain 11 (AtIDD11)                                                                                                                                                                                                                                                              |
| AtMsrB7             | 2 | REVEILLE 5 Dof zinc finger protein DOF4.7 (AT4G38000)                                                                                                                                                                                                                                              |
| AtMsrB8             | 2 | Indeterminate(ID)-domain 5 protein (RAVEN) ABA-responsive element binding protein 3                                                                                                                                                                                                                |
| AtMsrB9             | 1 | Phytochrome-interacting fator 5 (PIL6)                                                                                                                                                                                                                                                             |
| PtMsrA2.1           | 2 | Dof zinc finger protein DOF5.1 (AT5G02460) Dof zinc finger protein DOF2.2 (AT2G28810)                                                                                                                                                                                                              |
| PtMsrA4.1           | 1 | C-repeat-binding factor 3 (DREB1A)                                                                                                                                                                                                                                                                 |
| PtMsrA4.2           | 1 | Myb domain protein 118 (Plant Growth Activator 37, PGA37)                                                                                                                                                                                                                                          |

|           |   |                                                                                                                                                          |
|-----------|---|----------------------------------------------------------------------------------------------------------------------------------------------------------|
| PtMsrA5   | 2 | B3 domain-containing transcription factor NGA4 Myb domain protein 111 (secondary DNA binding preference)                                                 |
| PtMsrB3.1 | 2 | C-repeat-binding factor 2 (DREB1C) Dof zinc finger protein DOF5.8 (AT5G66940)                                                                            |
| OsMsrA2.2 | 2 | Iron-dependent regulatory sequence TCP class II transcription factor                                                                                     |
| OsMsrA4   | 3 | NAC domain containing protein 96 Ethylene-responsive transcription factor 105 Redox responsive transcription factor 1 (secondary DNA binding preference) |

**Table S3** List of (A) TFs and (B) REs sensitive to factors other than proteins. The TFs and REs were predicted to bind to the promoter region of 30 *Msr* gene sequences originating from the *Arabidopsis thaliana*, *Populus trichocarpa*, and *Oryza sativa* genomes. The predictions were made using MatInspector software. The abbreviation and gene identification number (ID) of each gene were derived from the NCBI database (<https://www.ncbi.nlm.nih.gov/>).

A)

| TF NAME                                                                                                          | ABBREVIATION     | ID             |
|------------------------------------------------------------------------------------------------------------------|------------------|----------------|
| Protodermal factor 2                                                                                             | PDF2             | 825828         |
| SBF-1 (Swi4 and Swi6)                                                                                            | SWI6, SWI4, SBF1 | 856847, 850879 |
| Homeodomain protein WUSCHEL                                                                                      | WUSCHEL          | 816305         |
| Homeodomain GLABROUS 1                                                                                           | HDG1             | 825287         |
| TESMIN/TSO1-like CXC 2                                                                                           | TCX2             | 827132         |
| KANADI box                                                                                                       | KAN, KAN1        | 831518         |
| G2-like family protein                                                                                           | GLK1, GLK2       | 816579         |
| Stomatal Carpenter 1 (dof5.7) (secondary DNA binding preference)                                                 | DOF5.7           | 836685         |
| DIVARICATA 1 (myb related R-R-type factor AT5G58900)                                                             | AT5G58900        | 836007         |
| Trihelix transcription factor GT-1                                                                               | GT-1             | 837905         |
| Transcriptional repressor BELLRINGER                                                                             | BLH-9            | 831745         |
| Nodulin consensus sequence 1                                                                                     | ENODL11          | 816933         |
| RAP2.2, involved in carotenoid and tocopherol biosynthesis and in the expression of photosynthesis-related genes | RAP2.2           | 820643         |

|                                                                                                                          |                   |                |
|--------------------------------------------------------------------------------------------------------------------------|-------------------|----------------|
| DNA-binding storekeeper protein-related transcriptional regulator (AT4G00250)                                            | STKL2 , AT4G00250 | 828046         |
| Class I GATA factors                                                                                                     | GATA22            | 828721         |
| Homeobox protein 32                                                                                                      | HB32              | 838033         |
| Myb-like protein of Petunia hybrid (odorant 1)                                                                           | ODO1              |                |
| Heterodimer of NAC-domain transcription factors GmNAC30 and GmNAC81                                                      | NAC030, NAC081    | 843524, 830779 |
| Myb domain protein 96 (MYBCOV1)                                                                                          | MYB96             | 836367         |
| Late elongated hypocotyl 1                                                                                               | LHY               | 839341         |
| Target of early activation tagged 1 (RAP2.7)                                                                             | RAP2-7            | 817403         |
| Yabby transcription factor CRABS CLAW                                                                                    | CRC               | 843249         |
| AS1/AS2 repressor complex binding motif II                                                                               | AS1, AS2          | 842873, 818340 |
| NAC WITH TRANSMEMBRANE MOTIF 1-LIKE 6 (NTL6/NTM1)                                                                        | NAC062            | 824115         |
| Storekeeper (STK), plant specific DNA binding protein important for tuber-specific and sucrose-inducible gene expression | AT4G00238         | 825892         |
| GAAA motif involved in pollen specific transcriptional activation                                                        | DUO1              | 825217         |
| Homeobox protein 34                                                                                                      | HB34              | 822527         |
| bZIP protein G-Box binding factor 1                                                                                      | GBF1              | 829826         |
| Circadian clock associated 1                                                                                             | CCA1              | 819296         |
| Homeobox-leucine zipper protein REVOLUTA (REV, IFL1)                                                                     | REV               | 836190         |
| AT-hook motif nuclear-localized protein 20                                                                               | AHL20             | 827093         |
| MADS-box protein SQUAMOSA                                                                                                | AP1               | 843244         |
| GT2-box and GT3-box motifs                                                                                               | GT2               | 844024         |
| WRKY DNA-binding protein 70                                                                                              | WRKY70            | 824807         |
| Homeobox-leucine zipper protein ATHB-24                                                                                  | HB24              | 816350         |
| HSE                                                                                                                      | HSF1              | 827496         |
| APETALA2                                                                                                                 | AP2               | 829845         |
| LATE ELONGATED HYPOCOTYL                                                                                                 | LHY               | 839341         |
| Zinc finger of Arabidopsis thaliana 6 (Cold induced zinc finger protein 2)                                               | ZAT6              | 830313         |
| Trihelix DNA-binding factor GT-3a                                                                                        | GT-3A, AT5G01380  | 831895         |
| WUSCHEL-related homeobox 13                                                                                              | WOX13             | 829707         |
| S1F, site 1 binding factor of spinach rps1 promoter                                                                      | AT3G53370         | 824505         |
| TESMIN/TSO1-like CXC 6 (At2G20110)                                                                                       | AT2G20110         | 816530         |
| Cis-element involved in SA (salicylic acid) induction of secretion-related genes via NPR1                                | NPR1              | 842733         |
| Secondary wall NAC binding elements                                                                                      | NAC012            | 840171         |
| GAZ-like 3 (AT5G22990)                                                                                                   | AT5G22990         | 832363         |
| Myb domain protein r1 (ATMYB44)                                                                                          | MYBR1             | 836865         |
| KH and zinc finger CCCH domain-containing protein                                                                        | AT5G06770         | 830566         |

|                                                                                                                                       |           |        |
|---------------------------------------------------------------------------------------------------------------------------------------|-----------|--------|
| Soybean embryo factor 4                                                                                                               | AGL15     | 831224 |
| Arabidopsis 6b-interacting protein 1-like 1                                                                                           | ASIL1     | 841844 |
| Evening element                                                                                                                       | RVE8      | 820117 |
| Dof3 - single zinc finger transcription factor                                                                                        | DOF2      | 821681 |
| Zea mays MYB-related protein 1 (transfer cell specific)                                                                               | MYR1      | 831942 |
| Homeobox-leucine zipper protein ATHB-23                                                                                               | HB23      | 833972 |
| Type-B response regulator (ARR10), member of the GARP-family of plant myb-related DNA binding motifs                                  | RR10      | 829322 |
| Myb-related protein 3R-1 (PC-MYB1)                                                                                                    | PC-MYB1   | 829409 |
| Heat stress transcription factor B-3                                                                                                  | HSFB3     | 818767 |
| Maize INDETERMINATE1 zinc finger protein                                                                                              | IDD1      | 836806 |
| Calmodulin-binding NAC protein                                                                                                        | NTL9      | 829710 |
| Myb domain protein 98                                                                                                                 | MYB98     | 827611 |
| NAC with transmembrane motif 1-like 8 (NTL8/NTM1-like 8)                                                                              | NTL8      | 817273 |
| Squamosa promoter-binding-like protein 9                                                                                              | SPL9      | 818820 |
| Myb domain protein 107                                                                                                                | MYB107    | 821178 |
| Telomere repeat-binding protein 5                                                                                                     | TRFL2     | 837268 |
| AGL15, Arabidopsis MADS-domain protein AGAMOUS-like 15                                                                                | AGL15     | 831224 |
| PBF (MPBF)                                                                                                                            | pbf1      | 542353 |
| NAC domain containing protein 103                                                                                                     | NAC103    | 836527 |
| DNA-binding protein of sweet potato that binds to the SP8a (ACTGTGTA) and SP8b (TACTATT) sequences of sporamin and beta-amylase genes | WRKY26    | 830601 |
| Early Flowering MYB Protein (AT2G03500)                                                                                               | AT2G03500 | 814878 |
| ICE (inducer of CBF expression 1), AtMYC2 (rd22BP1)                                                                                   | MYC2      | 840158 |
| Phosphate starvation response 1                                                                                                       | PHR1      | 828979 |
| Homeobox-leucine zipper protein ATHB-6                                                                                                | HB6       | 816775 |
| NAC domain containing protein 5                                                                                                       | NAC005    | 839390 |
| Dof1 / MNB1a - single zinc finger transcription factor                                                                                | OBP2      | 837277 |
| Botrytis-susceptible1 (MYB108)                                                                                                        | MYB108    | 819827 |
| Myb domain protein 3R-4                                                                                                               | MYB3R-4   | 831023 |
| High mobility group I/Y-like proteins                                                                                                 | HMG       | 822505 |
| Transcription factor of rice and barley binding to the iron deficiency-responsive cis-acting element 2 (IDE2)                         | FRU       | 817362 |
| NIN-binding nucleotide sequences                                                                                                      | NLP7      | 828502 |
| Zinc-dependent activator protein-1, WRKY 1                                                                                            | ZAP1      | 815035 |
| WRKY DNA-binding protein 50                                                                                                           | WRKY50    | 832686 |

|                                                                                                    |                    |                  |
|----------------------------------------------------------------------------------------------------|--------------------|------------------|
| NAC with transmembrane motif 1                                                                     | NTM1               | 828149           |
| Opaque-2 regulatory protein                                                                        | BZIP10             | 828219           |
| Trihelix transcription factor GTL1                                                                 | GTL1               | 840218           |
| Myb family transcription factor At3g10113                                                          | At3g10113          | 820173           |
| Recognition site for BZIP transcription factors that belong to the group of Opaque-2 like proteins | BZO2H1             | 828219           |
| Secondary wall MYB-responsive element, MYB46 and MYB83 binding sites                               | MYB46<br>MYB83     | 831127<br>819997 |
| WRKY plant specific zinc-finger-type factor associated with pathogen defence, W box                | WRKY4              | 837956           |
| Myb domain protein 52                                                                              | MYB52              | 838374           |
| Myb domain protein 49                                                                              | MYB49              | 835511           |
| Myb family transcription factor (G2-like family)                                                   | GLK1<br>GLK2       | 816579           |
| B3 domain-containing transcription factor FUS3                                                     | FUS3               | 822293           |
| RWP-RK domain containing 2                                                                         | RKD1               | 838461           |
| Growth-regulating factor 9                                                                         | GRF9               | 819156           |
| NAC domain containing protein 3                                                                    | NAC003             | 839476           |
| NAC domain containing protein 4                                                                    | NAC004             | 837630           |
| NAC domain containing protein 71                                                                   | NAC071             | 827523           |
| Nodulin consensus sequence 2                                                                       | NRP1               | 814873           |
| GT1-Box binding factors with a trihelix DNA-binding domain                                         | GT-3B<br>AT2G38250 | 818404           |
| Brassinazole-resistant 1                                                                           | BES1               | 838518           |
| Arabidopsis NAC domain containing protein 19                                                       | NAC019             | 841722           |
| Tracheary-element-regulating cis-element                                                           | NAC101             | 836359           |
| Homeobox 51, Late Meristem Identity 1                                                              | HB51               | 831723           |
| Basic pentacysteine proteins                                                                       | BPC6               | 834259           |
| Oryza sativa CaM-binding transcription factor                                                      | BAG6               | 819232           |
| Arabidopsis 6B-interacting protein 1-like 2 (AT3G14180)                                            | ASIL2              | 820635           |
| Paired amphipathic helix domain-containing protein                                                 | LOC9319679         | 9319679          |
| Protein ethylene insensitive 3                                                                     | ABI4               | 818614           |
| Telomere binding protein 3 (TRB2)                                                                  | TRB2               | 836894           |
| ETTIN (Auxin Response Factor 3)                                                                    | ARF3               | 817014           |
| Phytochrome interacting factor3-like 5                                                             | PIL5               | 816538           |
| NACL-inducible gene 1                                                                              | NIG1               | 834727           |
| AP2/ERF and B3 domain-containing transcription factor RAV1                                         | RAV1               | 837886           |
| Morning element (sequence motifs enriched in morning-phased genes)                                 | CCA1               | 819296           |



|                                                                                                                                                       |                  |                            |
|-------------------------------------------------------------------------------------------------------------------------------------------------------|------------------|----------------------------|
|                                                                                                                                                       | LHY              | 839341                     |
| Homeobox-leucine zipper protein ATHB-15 (INCURVATA 4)                                                                                                 | ATHB-15          | 841645                     |
| Shoot-apical-meristem arrest 2 (AT5G08750)                                                                                                            | SHA1             | 836498                     |
| Homeobox-leucine zipper protein ATHB-5                                                                                                                | HB5              | 836656                     |
| Myb domain protein 99 (ATMYBCU15)                                                                                                                     | MYB99            | 836353                     |
| PHR1-like 2 (G2-like family)(AT3G24120)                                                                                                               | AT3G24120        | 821998                     |
| Rice transcription activator-1 (RITA), basic leucine zipper protein, highly expressed during seed development                                         | GBF6             | 829611                     |
| Homeodomain glabrous 9                                                                                                                                | HDG9             | 831598                     |
| Myb domain protein 57                                                                                                                                 | MYB57            | 821113                     |
| Arabidopsis thaliana meristem layer 1                                                                                                                 | ATML1            | 828263                     |
| KANADI 4 (Aberrant Testa Shape)                                                                                                                       | ATS              | 834270                     |
| PHAVOLUTA(Homeobox-leucine zipper protein ATHB-9)                                                                                                     | PHV              | 839928                     |
| Binding sites for AP1, AP3-PI and AG dimers                                                                                                           | Ap1<br>NAP<br>AG | 843244<br>843282<br>827631 |
| AG-motif binding protein 1                                                                                                                            | LOC4326175       | 4326175                    |
| Male sterile 188 (MYB103)                                                                                                                             | MYB108           | 819827                     |
| AGL3, MADS Box protein                                                                                                                                | SEP4             | 814898                     |
| Abscisic acid responsive elements-binding factor 2 (AREB-1)                                                                                           | ABF2             | 841095                     |
| R2R3-type myb-like transcription factor (I-type binding site)                                                                                         | MYB0             | 822415                     |
| NAC domain containing protein 87                                                                                                                      | 822415           | 831591                     |
| WRINKLED 1                                                                                                                                            | WRI1             | 824599                     |
| Calmodulin binding WRKY transcription factor 11                                                                                                       | WRKY11           | 829282                     |
| Ethylene-responsive transcription factor SCHLAFMUTZE                                                                                                  | SMZ              | 824664                     |
| Homeobox protein 40                                                                                                                                   | HB40             | 829827                     |
| Ethylene-responsive transcription factor RAP2.1                                                                                                       | RAP2.1           | 841117                     |
| P1BS, PHR1 binding sequences                                                                                                                          | PHR1             | 828979                     |
| Two-component response regulator ARR11                                                                                                                | ARR11            | 843096                     |
| CXC domain containing TSO1-like protein 1 (TCX3)                                                                                                      | TSO1             | 821849                     |
| Heat shock transcription factor C1                                                                                                                    | HSFC1            | 822047                     |
| Heat shock transcription factor B2A                                                                                                                   | HSFB2A           | 836322                     |
| Arabidopsis NAC domain containing protein 92 (ATNAC6)                                                                                                 | NAC6             | 833957                     |
| Homeobox-leucine zipper protein ATHB-7                                                                                                                | HB-7             | 819280                     |
| Arabidopsis thaliana signal-responsive gene1, Ca <sup>2+</sup> / calmodulin binding protein homolog to NtER1 (tobacco early ethylene-responsive gene) | ESR1             | 837856                     |
| NAC secondary wall thickening promoting factor 2                                                                                                      | NAC012           | 840171                     |

|                                                                                                 |                   |           |
|-------------------------------------------------------------------------------------------------|-------------------|-----------|
| bZIP transcription factor binding to OCS-elements                                               | TGA1              | 836646    |
| Salt tolerance zinc finger (ZAT10)                                                              | STZ               | 839666    |
| Wheat bZIP transcription factor HBP1B (histone gene binding protein 1b)                         | AHBP-1B           | 830586    |
| Root hair-specific element with a 2-nucleotid spacer between left part (LP) and right part (RP) | RHS17             | 829996    |
| Reproductive Meristem 1                                                                         | FLR1              | 820391    |
| (GA)n/(CT)n binding proteins (GBP, soybean; BBR, barley)                                        | BPC1              | 814724    |
| NAC domain containing protein 16                                                                | NAC016            | 840317    |
| SEF3, Soybean embryo factor 3                                                                   | AGL15             | 831224    |
| Myb domain protein 65                                                                           | MYB65             | 820317    |
| ARID/BRIGHT DNA-binding domain-containing protein                                               | AT1G76510         | 843984    |
| Squamosa promoter binding protein-like 14                                                       | SPL14             | 838692    |
| LOB domain-containing protein 19                                                                | LBD19             | 819149    |
| Homeobox protein 25                                                                             | HB25              | 836666    |
| Dof zinc finger protein DOF3.4 (OBF binding protein 1)                                          | LOC109223803      | 109223803 |
| Myb domain protein 62 (BW62B)                                                                   | MYB62             | 843161    |
| Lateral organ boundaries                                                                        | LOB               | 836429    |
| Floral homeotic protein AGL15                                                                   | AGL15             | 831224    |
| Arabidopsis thaliana homeo box protein 1                                                        | HB-1              | 821138    |
| Root hair-specific element with a 3-nucleotid spacer between left part (LP) and right part (RP) | RSH2              | 837853    |
| Flowering locus C                                                                               | LOC9309509        | 9309509   |
| GCN4, conserved in cereal seed storage protein gene promoters                                   | ABCF4             | 824619    |
| NAC domain containing protein 79 (AT5G07680)                                                    | NAC080            | 830661    |
| Myb domain protein 56                                                                           | MYB56             | 831648    |
| Myb domain protein 46                                                                           | MYB46             | 831127    |
| Common plant regulatory factor (CPRF) from parsley                                              | APG3              | 825466    |
| SEPALLATA3, transcription factor AGL9                                                           | AGL9              | 18438039  |
| Target of early activation tagged (EAT) 2                                                       | TOE2              | 836134    |
| AGL2, Arabidopsis MADS-domain protein AGAMOUS-like 2                                            | SEP1              | 831436    |
| Dof zinc finger protein DOF1.6 (AT1G47655)                                                      | AT1G47655, DOF1.6 | 841175    |
| Calmodulin-binding transcription activator 1 (AtSR2)                                            | EICBP.B           | 830800    |
| GATA transcription factor 19 (HANABA TARANU LIKE 2, HANL2)                                      | GATA19            | 829814    |
| Myc recognition sequences                                                                       | NDL3              | 816481    |
| Arabidopsis leucine zipper protein TGA1                                                         | TGA1              | 836646    |
| Dehydration-responsive element-binding protein A-4                                              | DREB2A            | 830424    |
| Sunflower homeodomain leucine-zipper protein Hahb-4                                             | HB4               | 819100    |

|                                                                                |           |        |
|--------------------------------------------------------------------------------|-----------|--------|
| E2F class I sites                                                              | E2F1 E2F  | 832283 |
| Trihelix-domain transcription factor VFP5 (AT5G05550)                          | AT5G05550 | 830438 |
| Squamosa promoter-binding-like protein 5                                       | SPL5      | 820758 |
| Agamous, required for normal flower development,                               | AP1       | 843244 |
| Trihelix transcription factor GTL2                                             | At5g28300 | 832914 |
| Phytochrome interacting factor 4                                               | PIF4      | 818903 |
| BBES1/BZR1-like protein 3 (AT4G18890)                                          | BEH3      | 827623 |
| Mycorrhiza transcription factor                                                | SHR       | 829919 |
| Squamosa promoter-binding-like protein 1                                       | SPL1      | 819321 |
| WRKY DNA-binding protein 45                                                    | WRKY45    | 821270 |
| Homeobox protein 33                                                            | HB33      | 843861 |
| Basic region / leucine zipper motif 60                                         | BZIP60    | 840897 |
| Heat stress transcription factor A-6b                                          | HSFA6b    | 821854 |
| Callose Defective Microspore 1 (zinc finger CCCH domain-containing protein 15) | AT2G24830 | 817020 |
| Myb family transcription factor REVEILLE 1                                     | RVE1      | 831595 |
| Basic leucine-zipper 52                                                        | bZIP52    | 837197 |
| Oryza sativa bZIP protein 8                                                    | bZIP1     | 835005 |
| Maize activator P of flavonoid biosynthetic genes                              | P1        | 542272 |
| Late Meristem Identity 1 (AtHB51, LMI1)                                        | HB51      | 831723 |
| Reproductive Meristem 1                                                        | DCL1      | 839574 |
| ABORTED MICROSPORES                                                            | MYB12     | 819359 |
| High mobility group I/Y-like protein isolated from pea                         | HMGB1     | 824351 |
| Myb domain protein 121                                                         | MYB121    | 822714 |
| Ethylene-responsive transcription factor RAP2-6                                | RAP2.6    | 840915 |
| M-phase-specific activators (NtmybA1, NtmybA2, NtmybB)                         | MYB3R-4   | 831023 |
| Myb family transcription factor AT1G74840                                      | AT1G74840 | 843823 |
| HDZip class I protein ATHB5                                                    | HB5       | 836656 |
| Member of the EPF family of zinc finger transcription factors                  | SUP       | 821888 |
| ERSE I (ER stress-response element I)-like motif                               | BZIP60    | 840897 |
| SHI related sequence 1 (STYLISH 1)                                             | STY1      | 824270 |
| FAR-RED ELONGATED HYPOCOTYLS 3 and FAR-RED IMPAIRED RESPONSE 1                 | FHY3      | 821781 |
|                                                                                | HFR1      | 839300 |
| Myb domain protein 67 (ATY53)                                                  | MYB67     | 820454 |
| Myb domain protein R1 (ATMYB44)                                                | MYBR1     | 836865 |
| C-repeat/dehydration response element                                          | DREB1A    | 828652 |
| Two-component response regulator ARR14                                         | RR14      | 814707 |

|                                                                       |           |        |
|-----------------------------------------------------------------------|-----------|--------|
| Asymmetric leaves2-like 18 (LOB domain-containing protein 16)         | LBD16     | 818843 |
| Plant specific floral meristem identity gene LEAFY (LFY)              | LFY       | 836307 |
| Hordeum vulgare Myb-related CAB-promoter-binding protein 1            | CAB1      | 839871 |
| HD-ZIP class III protein ATHB9                                        | PHV       | 839928 |
| Myb-domain transcription factor werewolf                              | MYB66     | 831327 |
| Myb domain protein 31 (AtMYB31)                                       | MYB31     | 843804 |
| AGL1, Arabidopsis MADS-domain protein AGAMOUS-like 1                  | SHF1      | 825047 |
| VirE2-interacting protein 1                                           | VIP1      | 840957 |
| NAC domain containing protein 38                                      | NAC038    | 816979 |
| Homeobox-leucine zipper protein ATHB-53                               | HB53      | 836803 |
| Heat shock transcription factor C1                                    | HSFC1     | 822047 |
| WRKY DNA-binding protein 20                                           | WRKY20    | 828771 |
| Myb domain protein 33                                                 | MYB33     | 830497 |
| Transcription factor NAC2                                             | NAC2      | 830320 |
| Brassinosteroid insensitive 1-EMS suppressor 1                        | BES1      | 838518 |
| Myb domain protein 59                                                 | MYB59     | 836099 |
| ABA (abscisic acid) inducible transcriptional activator               | AIB       | 819262 |
| Myb domain protein 93                                                 | MYB93     | 840371 |
| Myb family transcription factor At5g56840                             | At5g56840 | 835786 |
| High Cambial Activity 2 (AT5G62940, DOF5.6)                           | HCA2      | 836414 |
| NAC domain containing protein 58                                      | NAC058    | 821369 |
| Oriza sativa leaf and tiller angle increased controller               | MAC5B     | 817507 |
| bZIP factors DPBF-1 and 2 (Dc3 promoter binding factor-1 and 2)       | ABI5      | 818199 |
| MADS-box protein GORDITA (AGL63)                                      | GOA       | 839999 |
| Myb domain protein 88                                                 | MYB88     | 814812 |
| Target of early activation tagged 1 (RAP2.7)                          | RAP2.7    | 817403 |
| TCP class I transcription factor (Arabidopsis)                        | TCP4      | 820732 |
| TCP class II transcription factor                                     | BRC1      | 821386 |
| Early-phytochrome-responsive 1 (REVEILLE 7)                           | RVE8      | 820117 |
| GATA transcription factor 4                                           | GATA4     | 825224 |
| Arabidopsis thaliana class A heat shock factor 1a                     | HSF1      | 827496 |
| ULT1 interacting factor 1 (AT4G37180)                                 | AT4G37180 | 829872 |
| Mitochondrial transcription termination factor family protein (mTERF) | BSM       | 828116 |
| Anaerobic basic leucine zipper                                        | abz1      | 544180 |
| H. vulgare dehydration-response factor 1                              | DREB1A    | 828652 |
| ABA insensitive protein 4 (ABI4)                                      | ABI4      | 818614 |

|                                                                                    |            |         |
|------------------------------------------------------------------------------------|------------|---------|
| Iron-deficiency-responsive element 1 (IDEF1)                                       | FRU        | 817362  |
| DREB and EAR motif protein 3                                                       | DEAR3      | 816866  |
| Flowering bHLH 3                                                                   | MYC3       | 834719  |
| Tomato MADS-box transcription factor MADS-RIN                                      | MYC2       | 840158  |
| Tobacco bHLH transcription factor MYC2                                             | MYC2       | 840158  |
| GATA transcription factor 11                                                       | GATA11     | 837316  |
| Elicitor response element                                                          | WRKY33     | 818429  |
| Myb domain protein 101 (ATM1)                                                      | MYB101     | 817807  |
| Dwarf and Delayed Flowering 1                                                      | ddf2       | 842606  |
| Phytochrome B-regulated transcription factor PIF3 (nuclear-localized bHLH-protein) | PIF3       | 837479  |
| DIVARICATA 6 (myb/SANT-like DNA-binding domain-containing protein AT5G05790)       | AT5G05790  | 830464  |
| Myb domain protein 3R-5                                                            | MYB3R-5    | 831802  |
| FAR1-related sequence 9                                                            | FRS3       | 817253  |
| LOB domain-containing protein 13                                                   | LBD13      | 817584  |
| NAC domain containing protein 92 (NAC6)                                            | NAC6       | 833957  |
| Myb-like HTH transcriptional regulator-like protein (G2-like family protein)       | APRR2      | 827527  |
| Myb/SANT-like DNA-binding domain-containing protein MYBS1                          | AT5G08520  | 830751  |
| Short Vegetative Phase                                                             | SVP        | 816787  |
| Myb family transcription factor AT1G19000                                          | AT1G19000  | 838481  |
| WRKY transcription factor 7                                                        | WRKY7      | 828525  |
| bZIP transcription factor Elongated Hypocotyl 5                                    | HY5        | 830996  |
| Floral homeotic protein APETALA1                                                   | AP1        | 843244  |
| DOF Affecting Germination 2                                                        | DAG2       | 819271  |
| Auxin Response Element                                                             | IAA7       | 821879  |
| Myb related transcriptional activator, direct ortholog of S.pombe CDC5 protein     | CDC5       | 837506  |
| Zinc finger CCCH domain-containing protein 67 (AT5G63260)                          | AT5G63260  | 836446  |
| TCP domain protein 16                                                              | TCP16      | 823651  |
| Myb domain protein 61                                                              | MYB61      | 837480  |
| myb domain protein 58                                                              | MYB58      | 838219  |
| Myb domain protein 27                                                              | MYB27      | 824486  |
| Myb family transcription factor At5g61620                                          | AT5G61620  | 836284  |
| Trihelix transcription factor GT-2                                                 | GTL1       | 840218  |
| Homeobox-leucine zipper protein HAT2                                               | HAT2       | 834784  |
| Rice iron-related transcription factor 2                                           | LOC4325750 | 4325750 |
| Transcription factor DYSFUNCTIONAL TAPETUM 1                                       | DYT1       | 827883  |
| Dof2 - single zinc finger transcription factor                                     | DOF2       | 821681  |

|                                                                                           |               |           |
|-------------------------------------------------------------------------------------------|---------------|-----------|
| Myb hypocotyl elongation-related (AT5G47390, KUODA)                                       | AT5G47390     | 834786    |
| Suppressor of overexpression of CO 1 (AGL20)                                              | AGL20         | 819174    |
| Heat stress transcription factor B-2a (HSF6)                                              | <b>HSFB2A</b> | 836322    |
| Squamosa promoter-binding-like protein 13                                                 | SPL13A        | 835126    |
| Ethylene-responsive transcription factor ERF057 (AT5G65130) Ethylene and salt inducible 3 | AT5G65130     | 836637    |
| Dehydration-responsive element-binding protein 2C                                         | DREB2C        | 818627    |
| B-box domain protein 31                                                                   | <b>BBX31</b>  | 821744    |
| Telomere repeat-binding protein 1                                                         | TRB2          | 836894    |
| Transcription factor TGA4 (OBF4)                                                          | TGA4          | 830866    |
| R2R3-MYB transcription factor AtMYB77                                                     | MYB77         | 824168    |
| Brassinazole-resistant 1 protein                                                          | BZR1          | 843845    |
| Arabidopsis NAC domain containing protein 92 (ATNAC2/ATNAC6)                              | LOC109243243  | 109243243 |
| Transcription factor Big Petal (AT1G59640)                                                | BPEp          | 842254    |
| Myb domain protein 96                                                                     | MYB96         | 836367    |
| WRKY transcription factor 22                                                              | WRKY22        | 827896    |
| DREB and EAR motif protein 4 (RAP2.10)                                                    | RAP2.10       | 829843    |
| Tobacco bZip transcription activator (TAF-1)                                              | HAF2          | 821437    |
| Ethylene-responsive transcription factor ERF043 (AT4G32800)                               | AT4G32800     | 829416    |
| Dof zinc finger protein DOF4.2                                                            | 827850        | 827850    |
| Homeobox-leucine zipper protein ATHB-20                                                   | HB20          | 821232    |
| Transcription factor TGA2                                                                 | AHBP-1B       | 830586    |
| Ethylene-responsive transcription factor ERF017 (AT1G19210)                               | AT1G19210     | 838504    |
| Ethylene-responsive transcription factor 1A (AT4G17500)                                   | ERF-1         | 827464    |
| Dehydration-responsive element-binding protein 2G (AT5G18450)                             | AT5G18450,    | 831963,   |
| FAR-RED Impaired Response 1                                                               | AT3G59470     | 825116    |
| Ethylene-responsive transcription factor 1B (AT3G23240)                                   | ERF1          | 821902    |
| Ethylene-responsive transcription factor RAP2-6                                           | RAP2.6        | 840915    |
| Dehydration response element-binding protein 19                                           | DREB19        | 818414    |
| Ethylene-responsive transcription factor ERF055 (AT1G36060)                               | AT1G36060     | 840510    |
| NAC (No Apical Meristem) domain transcriptional regulator superfamily protein             | NAC018        | 100779770 |
| Myb domain protein 74                                                                     | MYB74         | 825855    |
| Dof zinc finger protein DOF5.4 (OBF binding protein 4)                                    | 820929        | 836206    |
| NAC domain containing protein 17                                                          | NAC017        | 840318    |
| Transcription factor TCP22 (AT1G72010)                                                    | AT1G72010     | 843532    |

|                                                                         |               |           |
|-------------------------------------------------------------------------|---------------|-----------|
| Homeobox-leucine zipper protein ATHB-13                                 | ATHB13        | 843314    |
| Dof zinc finger protein DOF3.5 (AT3G52440)                              | AT3G52440     | 824409    |
| HRS1 Homolog 3 (AT1G25550)                                              | AT1G25550     | 839142    |
| Abscisic acid insensitive 5 (bZIP12, EEL)                               | ABI5          | 818199    |
| Myb domain protein 119                                                  | MYB119        | 836002    |
| Homeobox-leucine zipper protein ATHB-21                                 | 820929        | 814784    |
| Homeobox-leucine zipper protein ATHB-18                                 | 820929        | 843431    |
| Silencing element binding factor - transcriptional repressor            | AT2G42940     | 818895    |
| Duplicated SANT DNA-binding domain-containing protein MYBS2             | AT5G08520     | 830751    |
| Ethylene-responsive transcription factor RAP2-3                         | EBP           | 820929    |
| Dof zinc finger protein DOF4.5                                          | DOF4.5        | 827855    |
| Ethylene-responsive transcription factor ERF018                         | ERF018, ORA47 | 843832    |
| Heat stress transcription factor A-4a (HSF21)                           | HSFA4A        | 827622    |
| FYF Up-regulating 321 Factor 1 (AT1G71450)                              | AT1G71450     | 843486    |
| Ethylene-responsive transcription factor RAP2-11                        | RAP2.11       | 832099    |
| Redox responsive transcription factor 1                                 | RRTF1         | 829591    |
| Ethylene-responsive transcription factor 8                              | ERF8          | 841751    |
| Ethylene-responsive transcription factor RAP2-3                         | EBP           | 820929    |
| Target of early activation tagged (EAT) 2                               | TOE2          | 836134    |
| Ethylene-responsive transcription factor 15 (AT2G3123)                  | ERF15         | 817680    |
| Transcription factor TGA2                                               | AHBP-1B       | 830586    |
| Cooperatively regulated by ethylene and jasmonate 1 (DEAR1)             | CEJ1          | 824188    |
| CUP-SHAPED COTYLEDON 3                                                  | CUC3          | 843975    |
| CUP-SHAPED COTYLEDON 2                                                  | CUC2          | 835478    |
| NAM-like protein CUP-SHAPED COTYLEDON 1                                 | CUC1          | 820748    |
| BES1-interacting Myc-like protein 1                                     | BIM3          | 833877    |
| BES1-interacting Myc-like protein 2                                     | BIM2          | 843233    |
| KNOTTED1 (KN1) and KNOTTED interacting protein (KIP)                    | KNAT1         | 826364    |
| NAC domain containing protein 2                                         | NAC2          | 830320    |
| WRKY DNA-binding protein 40                                             | WRKY40        | 844423    |
| WRKY DNA-binding protein 18                                             | WRKY18        | 829308    |
| WRKY DNA binding protein 12                                             | WRKY12        | 819083    |
| WRKY DNA binding protein 38                                             | WRKY38        | 832320    |
| Ethylene-responsive transcription factor ERF112 (AT2G33710)             | AT2G33710     | 817936    |
| HBP-1a, suggested to be involved in the cell cycle-dependent expression | LOC103654950  | 103654950 |
| TCP domain protein 7                                                    | AT5G23280     | 832392    |
| LOB domain-containing protein 18                                        | LBD18         | 819150    |

|                                                                                                                |            |         |
|----------------------------------------------------------------------------------------------------------------|------------|---------|
| DNA-binding protein S1FA3                                                                                      | AT3G09735  | 820131  |
| bZIP transcription factor TGA1 (bZIP47)                                                                        | TGA1       | 836646  |
| VIRE2-interacting protein 1                                                                                    | VIP1       | 840957  |
| Ethylene-responsive transcription factor ERF039 (AT4G16750)                                                    | AT4G16750  | 827379  |
| ANT (Arabidopsis protein AINTEGUMENTA), member of the plant-specific family of AP2/EREBP-transcription factors | ANT        | 829931  |
| Basic region/leucine zipper transcription factor 68                                                            | bZIP68     | 840107  |
| Vascular related NAC-domain protein 1                                                                          | VND1       | 816318  |
| Basic leucine-zipper 28                                                                                        | LOC9318764 | 9318764 |
| Myb domain protein 55                                                                                          | MYB55      | 826853  |
| PHR1-like 1 (AT5G29000)                                                                                        | PHL1       | 833026  |
| BES1/BZR1 homolog 4 (AT1G78700)                                                                                | BEH4       | 844206  |
| DIVARICATA 5 (VHA-B1-interacting transcription factor AT3G11280)                                               | AT3G11280  | 820299  |
| TCP domain protein 2 (Teosinte branched 1)                                                                     | TCP2       | 827568  |
| TCP domain protein 24                                                                                          | TCP24      | 839901  |
| NAC domain containing protein 13                                                                               | NAC13      | 840181  |
| Ethylene-responsive transcription factor ERF014 (AT1G44830)                                                    | AT1G44830  | 841047  |
| Squamosa promoter-binding-like protein 14                                                                      | SPL14      | 838692  |
| CCHC-type zinc knuckle protein                                                                                 | TZP        | 834383  |
| Cytokinin Response Factor 10                                                                                   | CRF10      | 843184  |
| Transcription factor TCP23                                                                                     | AT1G35560  | 840452  |
| Ethylene-responsive transcription factor ERF019 (AT1G22810)                                                    | AT1G22810  | 838887  |
| Ethylene-responsive transcription factor 2                                                                     | ERF2       | 834768  |
| Ethylene-responsive transcription factor 10                                                                    | ERF10      | 839173  |
| Rice bHLH protein                                                                                              | bHLH39     | 824865  |
| Ethylene-responsive transcription factor 115                                                                   | AT5G07310  | 830622  |
| Dehydration-responsive element-binding protein 2C                                                              | DREB2C     | 818627  |
| TCP domain protein 21 (AT5G08330)                                                                              | TCP21      | 830730  |
| Ethylene-responsive transcription factor 5                                                                     | ERF5       | 834770  |
| WRKY transcription factor 8                                                                                    | WRKY8      | 834678  |
| C-repeat-binding factor 2 (DREB1B)                                                                             | CBF1       | 828653  |
| C-repeat-binding factor 3 (DREB1A)                                                                             | DREB1A     | 828652  |
| C-repeat-binding factor 2 (DREB1C)                                                                             | CBF2       | 828651  |
| E2F transcription factor 3                                                                                     | E2F3       | 818174  |
| LIM domain protein binding to a PAL-box like sequence                                                          | WLIM1      | 837558  |
| BBES1/BZR1-like protein 2 (AT4G36780)                                                                          | BEH2       | 829831  |
| Transcription factor TCP15 (AT1G69690)                                                                         | TCP15      | 843305  |



|                                                                               |              |           |
|-------------------------------------------------------------------------------|--------------|-----------|
| Heat stress transcription factor A-1b (HSF3)                                  | HSF3         | 831545    |
| NAC domain containing protein 3 (ORE1 SISTER1)                                | NAC3         | 820789    |
| Heat stress transcription factor C-1                                          | HSFC1        | 822047    |
| Myb domain protein 116 RY and Sph motifs conserved in seed-specific promoters | MYB116       | 839118    |
| NAC domain containing protein 45                                              | NAC045       | 821226    |
| Transcription factor TGA3                                                     | TGA3         | 838812    |
| Arabidopsis NAC domain containing protein 81                                  | LOC106396474 | 106396474 |
| ATAF2 WRKY transcription factor 55                                            | WRKY55       | 818669    |
| Indeterminate(ID)-domain 11 (AtIDD11)                                         | IDD11        | 820593    |
| Dof zinc finger protein DOF4.7 (AT4G38000)                                    | DOF4.7       | 829956    |
| Indeterminate(ID)-domain 5 protein (RAVEN)                                    | IDD5         | 814738    |
| ABA-responsive element binding protein 3                                      | AREB3        | 824852    |
| Phytochrome-interacting factor 5 (PIL6)                                       | PIL6         | 825075    |
| Dof zinc finger protein DOF5.1 (AT5G02460)                                    | AT5G02460    | 830976    |
| Dof zinc finger protein DOF2.2 (AT2G28810)                                    | OBP2         | 837277    |
| Myb domain protein 118 (Plant Growth Activator 37, PGA37)                     | MYB118       | 822399    |
| B3 domain-containing transcription factor NGA4                                | NGA4         | 826750    |
| Myb domain protein 111                                                        | MYB111       | 834993    |
| Dof zinc finger protein DOF5.8 (AT5G66940)                                    | AT5G66940    | 836828    |
| NAC domain containing protein 96                                              | NAC096       | 834702    |
| Ethylene-responsive transcription factor 105                                  | AT5G51190    | 835193    |
| REVEILLE 5                                                                    | AT4G01280    | 827903    |

Table S3B

| Responsive element                                                                        | Activating factor     |
|-------------------------------------------------------------------------------------------|-----------------------|
| Iron-dependent regulatory sequence                                                        | iron                  |
| Sugar responsive elements                                                                 | sugar                 |
| Ethylene-responsive elements (ERE) and jasmonate- and elicitor-responsive elements (JERE) | ethylene<br>jasmonate |
| CA-rich element                                                                           | microRNA              |
| Auxin Response Element                                                                    | auxin                 |

|                                                                                                                    |              |
|--------------------------------------------------------------------------------------------------------------------|--------------|
| Promoter elements involved in MgProto (Mg-protoporphyrin IX) and light-mediated induction                          | Mg<br>Light  |
| Sequence motif from the promoters of different sugar-responsive genes                                              | sugar        |
| Coupling element 3 (CE3), non-ACGT ABRE                                                                            | ABA          |
| Sugar and ABA responsive element conserved in several rbcS promoters                                               | sugar, ABA   |
| ABA response elements                                                                                              | ABA          |
| CAACTC regulatory elements, GA-inducible                                                                           | GA           |
| I-Box in rbcS genes and other light regulated genes                                                                | LIGHT        |
| Prolamin box, conserved in cereal seed storage protein gene promoters                                              | prolamin     |
| Hormone up-regulated at dawn element                                                                               | hormones     |
| GA-regulated myb gene from barley                                                                                  | gibberellins |
| Heat shock element                                                                                                 | heat         |
| Motif similar to the conserved 8 bp distal element of the 43 bp pseudo-palindromic nitrogen response element (NRE) | nitrogen     |
| Jasmonate response element JRE                                                                                     | jasmonate    |
| TEF cis acting elements in both RNA polymerase II-dependent promoters and rDNA spacer sequences                    |              |
| Ribosomal protein box, appears unique to plant RP genes and genes associated with gene expression                  |              |
| Plant TATA box                                                                                                     |              |
| Avian C-type LTR TATA box                                                                                          |              |
| Cellular and viral TATA box elements                                                                               |              |
| Mammalian C-type LTR TATA box                                                                                      |              |
